# Supplementary material
Source: publisher figshare collection journal article supplement (https://gsajournals.figshare.com/ndownloader/files/27662634)
Supplement: Supplementary file 1 [file 27662634]

>lcl|Query_10001
------------------------------------------------------------
------------------------------------------------------------
------------------------------------------------------------
------------------------------------------------------------
------------------------------------------------------------
------------------------------------------------------------
------------------------------------------------------------
------------------------------------------------------------
------------------------------------------------------------
------------------------------------------------------------
------------------------------------------------------------
------------------------------------------------------------
------------------------------------------------------------
------------------------------------------------------------
-------------------------------------------------TGG----PTAS
N---------------TNVAN---------------------------------------
------------------------------------------------------------
-----------------------GGSNGSGRTNFTTKQLTELEKEFHYNKYLTRARRIEI
ATALQLNETQVKIWFQNRRMKQKKR------------MK---------------------
---------------------------------E--GL-LV-------------------
------------------------------------------------------------
------------------------------------------------------------
------------------------------------------------------------
------------------------------------------------------------
------------------------------------------------------------
------------------------------------------------------------
------------------------------------------------------------
------------------------------------------------------------
------------------------------------------------------------
------------------------------------------------------------
------------------------------------------------------------
------------------------------------------------------------
------------------------------------------------------------
-------------------------------------------------------
>lcl|Query_10002
------------------------------------------------------------
------------------------------------------------------------
------------------------------------------------------------
------------------------------------------------------------
------------------------------------------------------------
------------------------------------------------------------
------------------------------------------------------------
------------------------------------------------------------
------------------------------------------------------------
------------------------------------------------------------
------------------------------------------------------------
------------------------------------------------------------
------------------------------------------------------------
------------------------------------------------------------
-------------------------DY-------------------NGYNSA----TTNS
S---------------DP------------------------------------------
------------------------------------------------------------
-----------------------NGGPGTGRTNFTTKQLTELEKEFHFNKYLTRARRIEI
ATALNLNETQVKIWFQNRRMKQKKR------------MK---------------------
---------------------------------E--GI-IPA------------------
------------------------------------------------------------
------------------------------------------------------------
------------------------------------------------------------
---------------------D-LS-----------------------------------
------------------------------------------------------------
------------------------------------------SS----GG----------
---------------------------E-------------TGSS---------------
------------------------------------------------------------
--------------------SPSVTASVPVSSSNSV---PSAPVVTSGP-----------
-----------------------------------------------LTSPD--------
------------------------------------------------------------
------------------------------------------------------------
------------------------------------------------------------
-------------------------------------------------------
>lcl|Query_10003
------------------------------------------------------------
------------------------------------------------------------
------------------------------------------------------------
------------------------------------------------------------
------------------------------------------------------------
------------------------------------------------------------
------------------------------------------------------------
------------------------------------------------------------
------------------------------------------------------------
------------------------------------------------------------
------------------------------------------------------------
------------------------------------------------------------
------------------------------------------------------------
------------------------------------------------------------
------------------------------------------------------------
------------------------------------------------------------
----------DNGM---------------------------------P------------
---------------------------RRLRTAYTNTQLLELEKEFHFNKYLCRPRRIEI
AASLDLTERQVKVWFQNRRMKHKRQ-TSVMK----DDDK----D---------------G
VDRSL-------DSGSDIATGGDSNEPDLDSDHGMPS-RTPEH-----SNTSKDLMN---
LDSDAGESCCA--P----------SP-AKSDAIIK------D--SDQPPVTSLKSPPALP
TTV---VCPSMVSPSTMS--------LERRSTPNTQNDV------TPMSMEER-LPVNTM
T-ISLSHSTVCDSIPSQTTV-SRTISTYKQ--NS-DISSN---KVPS---Q---HNVDI-
-----RPTT-TGVVSP-PSTNALYS--KSPSVPFPS----LPQENCTSNHVSPSPNYKRP
--RMYSG--PYPPD---PG--IGAYTPAGPVAASPPNG-PTY---CY-R--NPAPNHHSQ
PVHNQP-IDSSSYSTAI-QQRSYKAQH-QNNMPYYP--PQTSVQ-SSATSNQLPNACHPH
Q-N-----DMYSVPQR-N-SQIPDQSMMPQHQ------HYQQRSTVQ---QQQQ---PQS
S----YAYNSDQSSAHYPVTDY---N--HTRSYDNYH-PQ--QDMSMNSDYI---PPGN-
-----------------QV-SNNVVNNG-------YCY---P-SYRG--ENYS-DNTNMI
SHQQDMHGMYYDMN-----S---ANT--DESNNAYVS--SQP-KTNLSQDSG---YYELQ
NPIQESSAIS-DYA---ESQERFNSHA----E-----DFNYNCFSESECYSS--------
--------------------SNTCGTNDFNFL-NITNDYST-PEYYQLS-----------
------------------------------------------------------------
-------------------------------------------------------
>lcl|Query_10004
------------------------------------------------------------
------------------------------------------------------------
------------------------------------------------------------
------------------------------------------------------------
------------------------------------------------------------
------------------------------------------------------------
------------------------------------------------------------
------------------------------------------------------------
------------------------------------------------------------
------------------------------------------------------------
------------------------------------------------------------
------------------------------------------------------------
------------------------------------------------------------
------------------------------------------------------------
------------------------------------------------------------
------------------------------------------------------------
-------ENNENGM---------------------------------P------------
---------------------------RRLRTAYTNTQLLELEKEFHFNKYLCRPRRIEI
AASLDLTERQVKVWFQNRRMKHKRQ-SMMTK---NGDEK----GELEGGERPTSS-TPTG
GGSTL--------SGNEADTNKTDSADDRSATETSSSVGSPER-PPRGVKKQREMSSDRN
V-AERSPSTTATAA---DGLNEPLSPCSS-ERLLN---LDSD--FSQQPPNRIHSPGSVP
INN-ENLTGVSRKGSPTAA--------DLKSPEHSLSSSPP----T----EPIIHNLNSV
T-SDRSQSMVNSDTKSARSVCSGMTNGH---LNTTTGRNS--RKLPQS------CPMDT-
NIPFCNSPC-N-INCS-PAASNSHC--TSPGSVYQ-----MNSQHCPPNHISPSSSYHRT
--RSYSSTVPYSTD---PN-ALMAYSQNNHRGLSPSVGQSNY---CY-RTPPSTPNQQQS
YQHPSPQRMDNDWISQ---QSSYG-SQVQSPLYYTN---DRS--------------CPPQ
HNS---------MPHSQSQSQMGSAVSMGSHTVHS----APQRNSA-----HHPPV-SRS
P----YPYSVDSIPPQSQ------QH--DSHTHNAYMHDY--RG-DMNSGYSSNRSYSGT
HSNNGYDS-SVGSAGEQYV-PNSINPDG----SVSYCY---P-HHNN--ANSG-YRSDAY
DDNGS-QTIYYDLS-----N---STG--SNNRVPDYS--ATAPKQNFPQTGN---LYEVS
HTVGDTANIP-TY---NQNSENYRGQC----SGEGDISFNY--YDSSDSYSS--------
---------NNNN---GAATNNSCGTTDFNFL-TLASEFSS-PEYYQLS-----------
------------------------------------------------------------
-------------------------------------------------------
>lcl|Query_10005
------------------------------------------------------------
------------------------------------------------------------
------------------------------------------------------------
------------------------------------------------------------
------------------------------------------------------------
------------------------------------------------------------
------------------------------------------------------------
------------------------------------------------------------
------------------------------------------------------------
------------------------------------------------------------
------------------------------------------------------------
------------------------------------------------------------
------------------------------------------------------------
------------------------------------------------------------
------------------------------------------------------------
--------------------------------------FIG-------------------
------------------------------------------------------------
-----------------------EQPAKRARTAYTSAQLVELEKEFHFNRYLCRPRRIEM
ANLLNLSERQIKIWFQNRRMKFKKE------------QKSKG------------------
---------------------------------LYIQQSEKDM--------SSPVGSMA-
------------------------------------------------------------
------------------------------------------------------------
------------------------------------------------------------
--------------------GSSPL-----------------------------------
------------------------------------------------------------
---AS-----------------------------------SPTS----PTITSS--CSLA
SGGAPSVSTD---SS-AQS-ALTYGRQTSSTACSGISSYTVR---------AHSDPLSSS
--------PNKLSTSNPSTYPSPNGNKYFSSSNTSRNIQ-YQNTYSDPTLQSHRH---DF
PFA---QNES-----DKKR-LSSPSASSTPSHCVST------PPSPVSPFQLNIQQPLFS
ESQSNVPFASDSDSNAKNSPYYYNPS--SRIMVPSHANWDQ---HMSFQNNLSSSM--GL
LCTAVDYTTPNNVRSI---VNNTAYPPPLNHGSYYYHH-QQMMNNGQMAHEWLMSSQEAS
KPPKYP-SNASPKLA---------------------------------------------
------------------------------------------------------------
-------------------------------------------------------
>lcl|Query_10006
------------------------------------------------------------
------------------------------------------------------------
------------------------------------------------------------
------------------------------------------------------------
------------------------------------------------------------
------------------------------------------------------------
------------------------------------------------------------
------------------------------------------------------------
------------------------------------------------------------
------------------------------------------------------------
------------------------------------------------------------
------------------------------------------------------------
------------------------------------------------------------
------------------------------------------------------------
----------------------SDTNPGP-------------------------------
------------------------------------------------------------
------------------------------------------------------------
---------------------------KRSRQTYTRYQTLELEKEFHFNQYLTRRRRIEI
AHTLGLTERQIKIWFQNRRMKAKKE------------NK---------------------
---------------------------------FPISSSTSLA--------SPNNQLSN-
------------------------------------------------------------
------------------------------------------------------------
------------------------------------------------------------
--------------------QNSNS-----------------------------------
------------------------------------------------------------
---SD-----------------------------------IPDV----LHTK--------
---DGAMHFNNHQSQHQVPSKDSLLLTHYQRETLIT------------------------
------------------------------------------------------------
------------------------------------------------------------
------------------------------------------------------------
------------------------------------------------------------
------------------------------------------------------------
------------------------------------------------------------
-------------------------------------------------------
>lcl|Query_10007
------------------------------------------------------------
------------------------------------------------------------
------------------------------------------------------------
------------------------------------------------------------
------------------------------------------------------------
------------------------------------------------------------
------------------------------------------------------------
------------------------------------------------------------
------------------------------------------------------------
------------------------------------------------------------
------------------------------------------------------------
------------------------------------------------------------
------------------------------------------------------------
------------------------------------------------------------
-----------------------------TV-----------------------------
-------A----------------------------------------------------
----------ANGN-F-P--------------------------GVEP------------
---------------------------KRQRTAYTRHQILELEKEFHFNRYLTRRRRIEI
AHALCLSERQIKIWFQNRRMKWKKD-NKLPNT-KNVKKKNPN------------------
---------------------------------NANNANNNTN-T--NTTNNSNANNT--
--TNNNN-----------------------------------------------------
------------------------------------------------------------
-------------------------------------------PD-----QQNAN---RI
S------------NPQSQPPSLQSV----------------------VAPPQS-------
--SHHMVG-----------------------------------------PSPHSQ-----
-PNS-----------------------------------LVVD-----------------
-------------------TKTDYGLTEL-------------------------------
------------------------------------------------------------
------------------------------------------------------------
------------------------------------------------------------
------------------------------------------------------------
------------------------------------------------------------
------------------------------------------------------------
-------------------------------------------------------
>lcl|Query_10008
------------------------------------------------------------
------------------------------------------------------------
------------------------------------------------------------
------------------------------------------------------------
------------------------------------------------------------
------------------------------------------------------------
------------------------------------------------------------
------------------------------------------------------------
------------------------------------------------------------
------------------------------------------------------------
------------------------------------------------------------
------------------------------------------------------------
------------------------------------------------------------
------------------------------------------------------------
------------------------------------------------------------
------------------------------------------------------------
----------VNGN-F-P--------------------------GIEP------------
---------------------------KRQRTAYTRHQILELEKEFHFNRYLTRRRRIEI
AHALCLSERQIKIWFQNRRMKWKKD-NKLPNT-KNVKKKQPP------------------
---------------------------------ANNTTSTNSN-S---------TSNA--
--R---------------------------------------------------------
------------------------------------------------------------
------------------------------------------------------------
-------------------PQQPQQ----------------------QPPMVS-------
--LQAGGL-----------------------------------------HTPHMQ-----
-P-C-----------------------------------TPIE-----------------
-------------------PKDEYGLTEL-------------------------------
------------------------------------------------------------
------------------------------------------------------------
------------------------------------------------------------
------------------------------------------------------------
------------------------------------------------------------
------------------------------------------------------------
-------------------------------------------------------
>lcl|Query_10009
------------------------------------------------------------
------------------------------------------------------------
------------------------------------------------------------
------------------------------------------------------------
------------------------------------------------------------
------------------------------------------------------------
------------------------------------------------------------
------------------------------------------------------------
------------------------------------------------------------
------------------------------------------------------------
------------------------------------------------------------
------------------------------------------------------------
------------------------------------------------------------
------------------------------------------------------------
-----------------VFADGVNAMGET-------------------------------
------------------------------------------------------------
------------------------------------------------------------
---------------------------KRQRTSYTRYQTLELEKEFHFNRYLTRRRRIEI
AHALCLSERQIKIWFQNRRMKWKKE------------HK---------------------
----------------------------------LASTMPP-------------------
------------------------------------------------------------
------------------------------------------------------------
------------------------------------------------------------
------------------------------------------------------------
------------------------------------------------------------
------------------------------------------------------------
------------QIPQVMAD----------------------------------------
------------------------------------------------------------
------------------------------------------------------------
------------------------------------------------------------
------------------------------------------------------------
------------------------------------------------------------
------------------------------------------------------------
-------------------------------------------------------
>lcl|Query_10010
------------------------------------------------------------
------------------------------------------------------------
------------------------------------------------------------
------------------------------------------------------------
------------------------------------------------------------
------------------------------------------------------------
------------------------------------------------------------
------------------------------------------------------------
------------------------------------------------------------
------------------------------------------------------------
------------------------------------------------------------
------------------------------------------------------------
------------------------------------------------------------
------------------------------------------------------------
--------------------DGVNSMGET-------------------------------
------------------------------------------------------------
------------------------------------------------------------
---------------------------KRQRTSYTRYQTLELEKEFHFNRYLTRRRRIEI
AHALCLSERQIKIWFQNRRMKWKKE------------HK---------------------
----------------------------------MASPIPS-------------------
------------------------------------------------------------
------------------------------------------------------------
------------------------------------------------------------
------------------------------------------------------------
------------------------------------------------------------
------------------------------------------------------------
------------QIPQVIPDHLPHHMHGETKA----------------------------
------------------------------------------------------------
------------------------------------------------------------
------------------------------------------------------------
------------------------------------------------------------
------------------------------------------------------------
------------------------------------------------------------
-------------------------------------------------------
>lcl|Query_10011
------------------------------------------------------------
------------------------------------------------------------
------------------------------------------------------------
------------------------------------------------------------
------------------------------------------------------------
------------------------------------------------------------
------------------------------------------------------------
------------------------------------------------------------
------------------------------------------------------------
------------------------------------------------------------
------------------------------------------------------------
------------------------------------------------------------
------------------------------------------------------------
------------------------------------------------------------
------------------------------------TGSEAMT----TTNPLEWTGTVTV
------------------------------------------------------------
------------------------------------------------------------
---------------------------RKKRKPYSKFQTLELEKEFLFNAYVSKQKRWEL
ARNLNLTERQVKIWFQNRRMKSKK------------------------------------
------------------------------------------------------------
------------------------------------------------------------
------------------------------------------------------------
------------------------------------------------------------
------------------------------------------------------------
------------------------------------------------------------
------------------------------------------------------------
------------------------------------------------------------
------------------------------------------------------------
------------------------------------------------------------
------------------------------------------------------------
------------------------------------------------------------
------------------------------------------------------------
------------------------------------------------------------
-------------------------------------------------------
>lcl|Query_10012
------------------------------------------------------------
------------------------------------------------------------
------------------------------------------------------------
------------------------------------------------------------
------------------------------------------------------------
------------------------------------------------------------
------------------------------------------------------------
------------------------------------------------------------
------------------------------------------------------------
------------------------------------------------------------
------------------------------------------------------------
-----------------------------------------------------GKP----
------------------------------------------------------------
-------------------------------H-LF-L------------CVSG-------
--------------------------------------------------PN--------
-----------------GCPRRR-------------------------------------
------------------------------------------------------------
-----------------------------GRQTYTRFQTLELEKEFHFNHYLTRRRRIEI
AHALCLTERQIKIWFQNRRMKLKKE------------LR---------------------
---------------------------------AVKEINEQA------------------
------------------------------------------------------------
------------------------------------------------------------
------------------------------------------------------------
---------------------RLEA-----------------------------------
------------------------------------------------------------
------------------------------------------KL----KD----------
----------QDDGKRKN-SSATGNVDK-----------KDSSSIG---KDQHV------
-----------------------------------------------------DKIKHD-
VDG----DSRGRRESIQDEDNDSRNSTN--TDISTT---SVGDIVDTSP----------G
V----------------------------------------------DRLVARPLI----
----------------PSSDEASLP-----------------------------------
------------------------------------------------------------
------------------------------------------------------------
-------------------------------------------------------
>lcl|Query_10013
------------------------------------------------------------
------------------------------------------------------------
------------------------------------------------------------
------------------------------------------------------------
------------------------------------------------------------
------------------------------------------------------------
------------------------------------------------------------
------------------------------------------------------------
------------------------------------------------------------
-----------------------------------------------GN-----------
------------------------------------------------------------
-------------------------------ERLE------------GRLDF-HTA----
------------------------------------------------------------
-------------------------------A-EC-L-----------F-----------
----TVA------------G----------------------------------ANGL-R
------------------------------------------------------------
------------------------------------------------------------
---------------------------RRGRQTYTRYQTLELEKEFHTNHYLTRRRRIEM
AHALCLTERQIKIWFQNRRMKLKKE------------IQ---------------------
---------------------------------AIKELNEQER--------QAQAAKLA-
------------------------------------------------------------
------------------------------------------------------------
------------------------------------------------------------
--------------------AHQK------------------------------------
------------------------------------------------------------
-----------------------------------------SST----------------
------------------------------------------------------------
------------------------------------------------------------
------------------------------------------------------------
------------------------------------------------------------
------------------------------------------------------------
------------------------------------------------------------
------------------------------------------------------------
-------------------------------------------------------
>lcl|Query_10014
------------------------------------------------------------
------------------------------------------------------------
------------------------------------------------------------
------------------------------------------------------------
------------------------------------------------------------
------------------------------------------------------------
------------------------------------------------------------
------------------------------------------------------------
------------------------------------------------------------
------------------------------------------------------------
------------------------------------------------------------
------------------------------------------------------------
------------------------------------------------------------
------------------------------------------------------------
-------------------G----------------------------------ANGV-R
------------------------------------------------------------
------------------------------------------------------------
---------------------------RRGRQTYTRYQTLELEKEFHTNHYLTRRRRIEM
AHTLCLTERQIKIWFQNRRMKLKKE------------AQ---------------------
---------------------------------AIKELNEQER--------QAQAAKTA-
------------------------------------------------------------
------------------------------------------------------------
------------------------------------------------------------
--------------------AAQA------------------------------------
------------------------------------------------------------
-----------------------------------------INS----N----S-----N
S--NTTPTK--DGSTSLSA-T-------KT------------------------------
------------------------------------------------------------
------------------------------------------------------------
------------------------------------------------------------
------------------------------------------------------------
------------------------------------------------------------
------------------------------------------------------------
-------------------------------------------------------
>lcl|Query_10015
------------------------------------------------------------
------------------------------------------------------------
------------------------------------------------------------
------------------------------------------------------------
------------------------------------------------------------
------------------------------------------------------------
------------------------------------------------------------
------------------------------------------------------------
------------------------------------------------------------
------------------------------------------------------------
------------------------------------------------------------
------------------------------------------------------------
------------------------------------------------------------
------------------------------------------------------------
-------------------------LTER-------------------------------
------------------------------------------------------------
------------------------------------------------------------
---------------------------KRGRQTYTRYQTLELEKEFHFNRYLTRRRRIEI
AHALCLTERQIKIWFQNRRMKWKKE------------NK---------------------
-----------------------------------AKLEAG-------------------
------------------------------------------------------------
------------------------------------------------------------
------------------------------------------------------------
------------------------------------------------------------
------------------------------------------------------------
------------------------------------------------------------
------------LAIGPTPPELTH-L----------------------------------
------------------------------------------------------------
------------------------------------------------------------
------------------------------------------------------------
------------------------------------------------------------
------------------------------------------------------------
------------------------------------------------------------
-------------------------------------------------------
>lcl|Query_10016
------------------------------------------------------------
------------------------------------------------------------
------------------------------------------------------------
------------------------------------------------------------
------------------------------------------------------------
------------------------------------------------------------
------------------------------------------------------------
------------------------------------------------------------
------------------------------------------------------------
------------------------------------------------------------
------------------------------------------------------------
------------------------------------------------------------
------------------------------------------------------------
------------------------------------------------------------
-------------SNALIPFFFLSFFLER-------------------------------
------------------------------------------------------------
------------------------------------------------------------
---------------------------KRGRQTYTRYQTLELEKEFHFNRYLTRRRRIEI
AHALCLTERQIKIWFQNRRMKWKKE------------NK---------------------
-----------------------------------AK-EPG-------------------
------------------------------------------------------------
------------------------------------------------------------
------------------------------------------------------------
------------------------------------------------------------
------------------------------------------------------------
------------------------------------------------------------
------------AGFIMGTELVHH-L----------------------------------
------------------------------------------------------------
------------------------------------------------------------
------------------------------------------------------------
------------------------------------------------------------
------------------------------------------------------------
------------------------------------------------------------
-------------------------------------------------------
>lcl|Query_10017
------------------------------------------------------------
------------------------------------------------------------
------------------------------------------------------------
------------------------------------------------------------
------------------------------------------------------------
------------------------------------------------------------
------------------------------------------------------------
------------------------------------------------------------
------------------------------------------------------------
------------------------------------------------------------
------------------------------------------------------------
------------------------------------------------------------
------------------------------------------------------------
------------------------------------------------------------
----------------------------------------------MIALNFAGPNGCPR
------------------------------------------------------------
------------------------------------------------------------
---------------------------RRGRQTYTRFQTLELEKEFHFNHYLTRRRRIEI
AHALCLTERQIKIWFQNRRMKLKKE------------MR---------------------
---------------------------------AVKEINEQAR--------MESKVKE--
------------------------------------------------------------
------------------------------------------------------------
------------------------------------------------------------
--------------------EDKDK-----------------------------------
------------------------------------------------------------
---DN-------------------------------------------------------
---KERKTD----------------IINSPTSIILEDK-------------------IRN
PKP---------------------------------------------------------
------------------------------------------------------------
------------------------------------------------------------
------------------------------------------------------------
------------------------------------------------------------
------------------------------------------------------------
-------------------------------------------------------
>lcl|Query_10018
------------------------------------------------------------
------------------------------------------------------------
------------------------------------------------MN---GSLY-ED
TSN-SRS----------------------------------SLDVVQP----PQ-QPTAL
QP----GPLHI----------------PAKR----------------VAATT---LAVS-
-YAHP-------------DCG--V--DPS-GT----------------------------
-----------GVIR-HGH-A---GQPWG-------------------------------
YA------DA---A--AA-----------FDGH------S-QYNQ----------T-LCN
V---R--E----------------GM-TSGYYYNDHAARTAVA-AAA-----------AV
DRKPP--IKFWPNT-YELPS--AGP---S-TVATT-------DT-C-QS-FAPQT--WCN
YSPYS--GRVP-GHM------------------EP--HA-PQP---V-----AYLS-GDD
--RTRPPMD--------------G---FPHTDS--YTI---RT--FA--AEP-HVA----
------------------------------------------------------------
-------------------------------P-TY-V-----------PAGA--------
--------------------------------------------DPLNGNPLEWTGNVTV
------------------------------------------------------------
------------------------------------------------------------
---------------------------RKKRKPYSKFQTLELEKEFLFNAYVSKQKRWEL
ARNLNLTERQVKIWFQNRRMKSKKN------------SQ---------------------
----------------------------------RNAENNQNN--------NNTTATLG-
------------------------------------------------------------
------------------------------------------------------------
------------------------------------------------------------
--------------------NAQTN-----------------------------------
------------------------------------------------------------
---AS-----------------------------------GTVA----K-----------
------------------------------------------------------------
------------------------------------------------------------
------------------------------------------------------------
------------------------------------------------------------
------------------------------------------------------------
------------------------------------------------------------
------------------------------------------------------------
-------------------------------------------------------
>lcl|Query_10019
------------------------------------------------------------
------------------------------------------------------------
------------------------------------------------------------
------------------------------------------------------------
------------------------------------------------------------
------------------------------------------------------------
------------------------------------------------------------
------------------------------------------------------------
------------------------------------------------------------
------------------------------------------------------------
---------MHKTDY------------------EPFASDRNPC---F-----ATGNGFLA
IRSRDGPLH--------------NG--FCGENKQTPPP---RS----LQNQA-PLI----
------------------------------------------------------------
-------------------------------G-PT-QAISYRDAPSMRQTGAF-------
-----------------CVGRAPQTGNLPCL--------------------LVTSEDGTP
VCEEDEKPTF--GYVGPDCQTS------------------------VYPWMQN---SRHD
FKQKELSCHLKNQQ-----------------VSCLK------------------------
---------------------EGEELTKRVRTSYTQAQLVELEKEFHFNRYLCRPRRVEM
AAMLRLTERQIKIWFQNRRMKYKKD------------NRP--------------------
-----------------------------------KGYLTTNE------TPSPMTDNSS-
------------------------------------------------------------
------------------------------------------------------------
------------------------------------------------------------
--------------------PSVSS-----------------------------------
------------------------------------------------------------
---SS-----------------------------------PSI-----------------
--------------------DPASPSLYQPPPIIANINGATVPGSQENG-----------
--LTELSKFVTNRPISFKEYKLRGQKEISSMHGGHSP---SHGLIRDSSATLY--HSLDR
--------NT--PIDYGYC-------------AAKLRHFKNEAE-------GTTTEESDS
N-RVHQGSSFATHSQLNQEFHSVWPSDYKYTSSCIGNLSEINSTSVSSAVQSWNKR--KN
GDKFTLASEENENIPSKGNVSLPASSQSPLSSYQGYSQYCHFP-----NYGIFRETLGQG
CKSEDQDVKPLSSFHFTHL-----------------------------------------
------------------------------------------------------------
-------------------------------------------------------
>lcl|Query_10020
------------------------------------------------------------
--------------------------------------------MMNSYFDQ-SGFYN--
-SQGSA-----------------------EQPYR-FPQGLLVPPYP-QPSSARSAHD---
---PSYV--------------------------------------------D-G-GSTTA
SA---------------------------CK----------------LYTS----D-GT-
SV-FK------------AECLS---KDQN-GFNQAVKE----------------------
--------MTT-WPP-STLAGVRP------------------------------------
AG-----ISN---D--PMRS---------FT--------AGD------------------
------------------------------------------------------------
--------------TTSTPR--VSDA--------W-------SQ-CCQN-----------
------------------------------------------------------------
-------------------------------PPA------------VAQAPT-NAF----
------------------------------------------------------------
-------------------------------Y-PW-------------M-----------
----AIA------------GLSGSFG----------------------------ANGL-R
------------------------------------------------------------
------------------------------------------------------------
---------------------------RRGRQTYTRYQTLELEKEFHTNHYLTRRRRIEM
AHALCLTERQIKIWFQNRRMKLKKE------------IQ---------------------
---------------------------------AIKELNEQER--------QAQAAKLA-
------------------------------------------------------------
------------------------------------------------------------
------------------------------------------------------------
--------------------AQQQ------------------------------------
------------------------------------------------------------
---Q------------------------------------QQSQ----QSQQ-------S
QQQGAASVST--STKTTND-TSA---PVKT------------------------------
------------------------------------------------------------
------------------------------------------------------------
------------------------------------------------------------
------------------------------------------------------------
------------------------------------------------------------
------------------------------------------------------------
-------------------------------------------------------
>lcl|Query_10021
------------------------------------------------------------
------------------------------------------------------------
------------------------------------------------------------
------------------------------------------------------------
------------------------------------------------------------
------------------------------------------------------------
------------MIMSSFLMNSPPY---------------VDPKFPPTEEYSQGNYIPSH
G-G--DYYA----------------------------PQH-H---------PY---GYS-
V---NGP--HAGVNYG--Q--ENGGP---GYTNHGGSP---HY---------YQHSCSLT
QNT---VTPLSRPNTLT-AIDHV-PP--NHSPGPM-------L-TGPPQH----------
---------RSPV----------------SSP--------PPG--AV-LSRHPMHHPPLP
----HHPPHPH-----------------QPP---QQQTG-PNSNCNLS-GSG--Q-----
------------------------------------------------------------
----------------------------PVIY-PW-MK----------------------
-------KVHINAA----------------------------------------------
------------------------------------------------------------
-----------NGS-FT---------------------------GIEP------------
---------------------------KRQRTAYTRHQILELEKEFHFNRYLTRRRRIEI
AHALCLSERQIKIWFQNRRMKWKKD-NKLPNT-KNVKKKQQN------------------
---------------------------------NQSSANHAQQ-Q---------QQQP--
--PTGPPP----------------------------------------------------
------------------------------------------------------------
-------------------------------------------P----------------
-------------------PPPPQQ----------------------PPPQQQPP-----
-----Q--------------------------------------------PPHMM-----
-PPHP-Q-----------------------------------------------------
-------------PPPPIDPKDDYGLTEL-------------------------------
------------------------------------------------------------
------------------------------------------------------------
------------------------------------------------------------
------------------------------------------------------------
------------------------------------------------------------
------------------------------------------------------------
-------------------------------------------------------
>lcl|Query_10022
------------------------------------------------------------
------------------------------------------------------------
------------------------------------------------------------
------------------------------------------------------------
------------------------------------------------------------
------------------------------------------------------------
--------------------------MS----------SYYT--NSYLPDLRNNGDHYA-
-------VNG--QPVQS-------QPNGEI-----CDQSQRQFI-Q--PQYA-S-SPAQG
A-TYPRFPPYDRLEIRPITS-APTTPSPPGAYYGNPCSQQPPG--S-L----PQPAHQPP
P-HPP------------LNHPNAYVPQ-DG-------Q-NCRGSP--NDPSAPQ-HPNMS
PAPYP-SCKMQPQQ--------PHPQQQMGHDPNG-IHRPINS-EC-------PSSM--P
P-----------CQSP--VQSPP-----QQ-MYTP---------NHPAPPN-----QANP
VQQHPVQPPPAGSLPSP------------LY-----------------------------
---------------------------------PW-MRSQ--------------------
------------------------------------------------------------
------------------------------------------------------------
---------------------------------------------FER------------
---------------------------KRGRQTYTRYQTLELEKEFHFNRYLTRRRRIEI
AHALCLTERQIKIWFQNRRMKWKKE-NKAKLE-AGLTMG-TPP-ELTHL-PEHPSQ----
------------------------------------------------------------
------------------------------------------------------------
------------------------------------------------------------
------------------------------------------------------------
------------------------------------------------------------
------------------------------------------------------------
------------------------------------------------------------
------------------------------------------------------------
------------------------------------------------------------
------------------------------------------------------------
------------------------------------------------------------
------------------------------------------------------------
------------------------------------------------------------
------------------------------------------------------------
-------------------------------------------------------
>lcl|Query_10023
------------------------------------------------------------
------------------------------------------------------------
------------------------------------------------------------
----------------------------------------------------MS-----S
YQFVNSLT-S-------------------CY----------GQRGQDTTGQDYYTPQVQ-
TYG---------------SCYS--------GPGS--PV-------------QQ-------
---YGP-YPQHNVQ---HL--Q-----------NG-----------DHH-FNSCS-----
-------------------------------------------------------Q--RL
-----------------------SHP------NPSQSPRTPTP-----SAT-PVPSCKY-
----------A-EPS--ASS-----------PQDL-----STSASHPPPAGSP-------
------------E-------------SR-SSPQPPRHT--PQP-QQPPPHHQQQ------
---SPNQSQSQQ----------HSP---QHQQPQQSQSPHTPQPGQ-----QN-Q-----
--------------QKATFPQGNPPQ----------------------------------
------------------------------IY-PW-MR----------------------
-------KVHVGQN----------------------------------------------
------------G-----------------------------------------------
----------VNAM-------------------------------GET------------
---------------------------KRQRTSYTRYQTLELEKEFHFNRYLTRRRRIEI
AHALCLSERQIKIWFQNRRMKWKKE-----------------------------------
------------------------------------------H----------KMAST--
MPPQI-------------------------------------------------------
------------------------------------------------------------
-------------------------------------------PQVM--PDHH---HH--
--------------PH------LHG----------------------ETKA---------
------------------------------------------------------------
------------------------------------------------------------
------------------------------------------------------------
------------------------------------------------------------
------------------------------------------------------------
------------------------------------------------------------
------------------------------------------------------------
------------------------------------------------------------
------------------------------------------------------------
-------------------------------------------------------
>lcl|Query_10024
------------------------------------------------------------
------------------------------------------------------------
------------------------------------------------------------
------------------------------------------------------------
------------------------------------------------------------
------------------------------------------------------------
------------------------------------------------------------
------------------------------------------------------------
------------------------------------------------------------
------------------------------------------------------------
------------------------------------------------------------
------------------------------------------------------------
------------------------------------------------------------
------------------------------------------------------------
----------------------------------------------------------MP
------------------------------------------------------------
------------------------------------------------------------
---------------------------RRLRTAYTNTQLLELEKEFHFNKYLCRPRRIEI
AASLDLSERQVKVWFQNRRMKHKRQ------------TM---------------------
---------------------------------MNKNGGDEKN--------GSTSNGEE-
------------------------------------------------------------
------------------------------------------------------------
------------------------------------------------------------
--------------------SSRGD-----------------------------------
------------------------------------------------------------
---GG-----------------------------------TPNA----AGGEAE-----N
KDPNADDRSATETSSSVGSPAEQPLRTKELGKATSSSDAGDACCRQPASPVSSESV----
------------------------------------------------------------
------------------------------------------------------------
------------------------------------------------------------
------------------------------------------------------------
------------------------------------------------------------
------------------------------------------------------------
-------------------------------------------------------
>lcl|Query_10025
------------------------------------------------------------
------------------------------------------------------------
------------------------------------------------------------
------------------------------------------------------------
------------------------------------------------------------
------------------------------------------------------------
------------------------------------------------------------
------------------------------------------------------------
------------------------------------------------------------
------------------------------------------------------------
------------------------------------------M---T-----DCCQE-VN
YAGRHNMQK--------------TC--Y---EPHSVLA-YMNGYDPKMVASTGNAY----
------------------------------------------------------------
-------------------------------G-SP-----------HECSNHNGYQPPVI
LQQRTPCLLDGQLGTPESRQMIPLLAGHPYTP---SPQLSAESTPSLSRPSSQENGEFFP
SFHGALHPPD-DGLQQHISDRDD-------------------GSKTPFLWVRD-SRPVAS
TVRQYP---VSSQA-----------------AMLGA------------------------
---------------------GDQQPVKRARTAYTSAQLVELEKEFHFNRYLCRPRRVEM
ASLLNLTERQIKIWFQNRRMKFKKE------------QKA--------------------
-----------------------------------KGFLPD-K------TPSPPIASHS-
------------------------------------------------------------
------------------------------------------------------------
------------------------------------------------------------
--------------------SS--P-----------------------------------
------------------------------------------------------------
---LS-----------------------------------QPTS----PATA-------T
PAPTSAT-SVTSPVSASIPGSGTPSPCVPNH-LLTDPQGAVLLGQPPRADPTCHRSLMEN
------TSGHLTHG-CLV-TDSH--PPPF----------QQRLLSTSSPA--------CH
QQHQPMHSMGTP------PVHH-QP--------PPLYHPDGSISQEA-PQHPYVFPQSAM
VPENPTQYSNSHPHYQHH--SEYSVSDK-RQEDYLPHAVNNPPHCMDNTVCLDSKGQLAS
DISVNE---------LSDTNAYAVPSVV--PFRGHSMCYDQ--IASEWDLVRSRVRDDNT
RYHP----PPRLTHL---------------------------------------------
------------------------------------------------------------
-------------------------------------------------------
>lcl|Query_10026
------------------------------------------------------------
------------------------------------------------------------
------------------------------------------------------------
--------MTSN-FMDGVLGTKF-------------AAD--PTS----------------
------SASAL----------------PGYG----------------HT------QH---
----------------------RMYPYVSLSPQSSMSV----------------------
--------TGNLYYTSN-------------------------------------------
A-D----FA-----------------------K------SCRYSGA---------QS-NG
L---D-GA----------------GT--G-YSFNLQ--NCAA----A-------------
--VAV--------SGPTSN-PTMMAPS-QFFPHPA-------SAADLGSPLTS-------
----------------------------------------CSQ---L-------------
-----------------------GM---RQLEPI----------------P-DVPR----
------------------------------------------------------------
-------------------------------Y-PW-M------------SIAG-------
-----------------------FAENAS------------------IKCPN--------
-----------------GCPRRR-------------------------------------
------------------------------------------------------------
-----------------------------GRQTYTRFQTLELEKEFHFNHYLTRRRRIEI
AHALCLTERQIKIWFQNRRMKLKKE------------LR---------------------
---------------------------------AVKEINEQA------------------
------------------------------------------------------------
------------------------------------------------------------
------------------------------------------------------------
---------------------RLEA-----------------------------------
------------------------------------------------------------
-------------------------------------------K----LK----------
----------DQQSSSKE----NK--ER-----------DEGGEQE--------------
--------------------------------------------------------KSV-
------------------SK---------QTSAASE---KDK-PAVDAA----------V
A----------------------------------------------APEDSKSRS----
----------------P------HP-----------------------------------
------------------------------------------------------------
------------------------------------------------------------
-------------------------------------------------------
>lcl|Query_10027
------------------------------------------------------------
------------------------------------------------------------
------------------------------------------------MN---GHLY-ED
TSP-SRS----------------------------------GLDVV------GS-IQPSL
Q------PLHI----------------PAKR----------------VTPTL----TVT-
-YGPP-------------DCGG-----------D---A----------------------
---------SAGVIR-QGH----NGQPWG-------------------------------
YST----AET---H--SAF----------DS--------HSQFNQ----------S-LCA
V---R--E----------------GM-APTYYYNEHATRA------------------TP
DRKTP--LKFWTNS-YELTS--AGTSN-V-SSV-V-------DT-C-QT-FAPQT--LCS
YSPYP-GTRVS-GHM------------------DP--HV-PPP---A-----TYFA-ADD
RARA--PID--------------S---FPHVDG--YAL---RS--YAT-PET-HVS----
------------------------------------------------------------
-------------------------------T-PY-L-----------PQGTV-------
------------------------------------------IESAAAVNPVEWSGGVTI
------------------------------------------------------------
------------------------------------------------------------
---------------------------RKKRKPYSKFQTLELEKEFLFSAYVSKQKRWEL
ARNLNLTERQVKIWFQNRRMKSKKT------------TQ---------------------
----------------------------------RNRENNQNN--------TNTGNSSQ-
------------------------------------------------------------
------------------------------------------------------------
------------------------------------------------------------
--------------------SNNSA-----------------------------------
------------------------------------------------------------
---SV-----------------------------------K-------------------
------------------------------------------------------------
------------------------------------------------------------
------------------------------------------------------------
------------------------------------------------------------
------------------------------------------------------------
------------------------------------------------------------
------------------------------------------------------------
-------------------------------------------------------
>lcl|Query_10028
------------------------------------------------------------
------------------------------------------------------------
------------------------------------------------------------
------------------------------------------------------------
------------------------------------------------------------
------------------------------------------------------------
------------MIMSAYLMNSPAY---------------GDPKFPPSEEYSQGNYIPSH
G-G--DYYT----------------------------PQQQH---------PY---GY--
V---NSP--HGGVNYG--Q--ENGGP---TYTDHGGSP---HY---------YRHPCGMA
PNP---V-SMSRPPGLPPTLEHM-PT--SHSPLPI-------L----PQHQQ--------
---------RSPV----------------SSPGLSRVQHPPPS--IQ-LSQH--HQPPLP
PPHHHHPPPPHHHHHH----HNQTQ----QPPQPQQPPGHPSPDCVASTGGG--P-----
------------------------------------------------------------
----------------------------PVIY-PW-MK----------------------
-------KVHVGTV----------------------------------------------
------------------------------------------------------------
-----------NGN-FA---------------------------GVEP------------
---------------------------KRQRTAYTRHQILELEKEFHFNRYLTRRRRIEI
AHSLCLSERQIKIWFQNRRMKWKKD-NKLPNT-KNVKKKNQQ------------------
---------------------------------NQN-QNQNQN-T---------ANQR--
--NQPPPP----------------------------------------------------
------------------------------------------------------------
-------------------------------------------P----------------
-------------------APPAPP----------------------PPPLPPPL-----
-----QQM-----------------------------------------LPPQSQ-----
-PS---------------------------------------------------------
----------------PID-KSDYGLTEL-------------------------------
------------------------------------------------------------
------------------------------------------------------------
------------------------------------------------------------
------------------------------------------------------------
------------------------------------------------------------
------------------------------------------------------------
-------------------------------------------------------
>lcl|Query_10029
------------------------------------------------------------
------------------------------------------------------------
------------------------------------------------------------
------------------------------------------------------------
------------------------------------------------------------
------------------------------------------------------------
------------------------------------------------------------
------------------------------------------------------------
------------------------------------------------------------
------------------------------------------------------------
------------------------------------------------------------
------------------------------------------------------------
------------------------------------------------------------
------------------------------------------------------------
------------------MKSYTDSGPGP-------------------------------
------------------------------------------------------------
------------------------------------------------------------
---------------------------KRTRQTYTRYQTLELEKEFHFNKYLTRRRRIEI
AHALGLTERQIKIWFQNRRMKAKKE------------NK---------------------
-----------------------------------GQDEAG-------------------
------------------------------------------------------------
------------------------------------------------------------
------------------------------------------------------------
------------------------------------------------------------
------------------------------------------------------------
------------------------------------------------------------
------------QPTMEVSHAINPIKDVNPHETVVIS-----------------------
------------------------------------------------------------
------------------------------------------------------------
------------------------------------------------------------
------------------------------------------------------------
------------------------------------------------------------
------------------------------------------------------------
-------------------------------------------------------
>lcl|Query_10030
------------------------------------------------------------
--------------------------------------------MMNSYFEQ-SGFYN--
-GQGTT-----------------------EQSYR-FPQGLLVPPYP-QPSSARAAHE---
------------------------------------------------PGYG-D-GSTPT
SS--------------------------GCK----------------LYTTAVGDS--S-
AI-FK------------PECLT---KEQN-GFNQAVKD----------------------
--------MAS-WPS-TSLTGVRP------------------------------------
AT-----MSA---D--AMRS---------FP--------S-D------------------
------------------------------------------------------------
--------------NPATPR--VTDA--------W-------ST-CCQN-----------
------------------------------------------------------------
-------------------------------PPA------------MAQSPA-NAF----
------------------------------------------------------------
-------------------------------Y-PW-------------M-----------
----AIA------------G----WC----------------------------ANGL-R
------------------------------------------------------------
------------------------------------------------------------
---------------------------RRGRQTYTRYQTLELEKEFHTNHYLTRRRRIEM
AHALCLTERQIKIWFQNRRMKLKKE------------IQ---------------------
---------------------------------AIKELNEQER--------QAQAAKIA-
------------------------------------------------------------
------------------------------------------------------------
------------------------------------------------------------
--------------------TQPQG-----------------------------------
------------------------------------------------------------
---QS-----------------------------------QQTQ----QSQQ-Q-----Q
QAKGQQPSST--SATPVTD-SGSN-APGKT------------------------------
------------------------------------------------------------
------------------------------------------------------------
------------------------------------------------------------
------------------------------------------------------------
------------------------------------------------------------
------------------------------------------------------------
-------------------------------------------------------
>lcl|Query_10031
------------------------------------------------------------
---------------------------------------------MSSHF----------
------------------------------------------------------------
-----------------------------------------------------------G
NI----SANNW----------------TNSN----------------QEQFYAQS---A-
KYAMN------------YS---DNHYGQ---YTPSSPF----------------------
--------AA-RYS------------P-Y------------------------------N
RID----GPN---I--P--------------AK------TPPYDHS---------A----
I---S--Y----------------DI-SHQNFYGTPLASRPD----------------AT
PTVPTD-SAEFS-------------------------------S-CKLASFG--------
------------------------------------------T---T-----CNN--QFD
NSPT---TT---------------Q--IYGNRPL--QT---SS--PVQTAPKP-NI----
------------------------------------------------------------
-------------------------------Y-PW-M-----------KSYTD-------
------------------------------------------------------S-GQGP
------------------------------------------------------------
------------------------------------------------------------
---------------------------KRTRQTYTRYQTLELEKEFHFNRYLTRRRRIEI
AHALGLTERQIKIWFQNRRMKAKKE------------NK---------------------
----------------------------------LQ-ATLP-------------------
------------------------------------------------------------
------------------------------------------------------------
------------------------------------------------------------
------------------------------------------------------------
------------------------------------------------------------
------------------------------------------------------------
------------------------------------------------------------
------------------------------------------------------------
------------------------------------------------------------
------------------------------------------------------------
------------------------------------------------------------
------------------------------------------------------------
------------------------------------------------------------
-------------------------------------------------------
>lcl|Query_10032
------------------------------------------------------------
------------------------------------------------------------
------------------------------------------------------------
------------------------------------------------------------
------------------------------------------------------------
------------------------------------------------------------
------------------------------------------------------------
------------------------------------------------------------
------------------------------------------------------------
------------------------------------------------------------
------------------------------------------------------------
--------------------------------------------------M--QVK----
------------------------------------------------------------
----------------------------------------------------RS------
-------LPKP-VTK---Q------DY-------------------GLTSND--------
--------------------A---------------------------------------
------------------------------------------------------------
-----------------------AGGPGSGRTNFTTKQLTELEKEFHFNKYLTRARRIEI
ATALQLNETQVKIWFQNRRMKQKKR------------MK---------------------
---------------------------------E--GL-VPT------------------
------------------------------------------------------------
------------------------------------------------------------
------------------------------------------------------------
---------------------D-SP-----------------------------------
------------------------------------------------------------
-------------------------------------------P----EG----------
---------------------------G-------------ASTP---------------
------------------------------------------------------------
--------------------APSSAPAPP----------PSAV---SSA-----------
-----------------------------------------------LTTSD--------
------------------------------------------------------------
------------------------------------------------------------
------------------------------------------------------------
-------------------------------------------------------
>lcl|Query_10033
------------------------------------------------------------
------------------------------------------------------------
------------------------------------------------------------
------------------------------------------------------------
------------------------------------------------------------
------------------------------------------------------------
------------------------------------------------------------
------------------------------------------------------------
------------------------------------------------------------
------------------------------------------------------------
------------------------------------------------------------
------------------------------------------------------------
------------------------------------------------------------
------------------------------------------------------------
------------MRKVHVGQNGVNAMGET-------------------------------
------------------------------------------------------------
------------------------------------------------------------
---------------------------KRQRTSYTRYQTLELEKEFHFNRYLTRRRRIEI
AHALCLSERQIKIWFQNRRMKWKKE------------HK---------------------
----------------------------------MANTLPP-------------------
------------------------------------------------------------
------------------------------------------------------------
------------------------------------------------------------
------------------------------------------------------------
------------------------------------------------------------
------------------------------------------------------------
------------QIPQVMPDHHPH-LHSETKA----------------------------
------------------------------------------------------------
------------------------------------------------------------
------------------------------------------------------------
------------------------------------------------------------
------------------------------------------------------------
------------------------------------------------------------
-------------------------------------------------------
>lcl|Query_10034
------------------------------------------------------------
------------------------------------------------------------
------------------------------------------------------------
--------MSSN-FMDSFLANKY-------------TPDA--VS----------------
------SAA-L----------------QGYG----------------H-P-----QH---
----------------------RLYPYASLSPSSSVAV----------------------
--------SGTLYYTSN-------------------------------------------
A-D----LA-----------------------K------SCRY-ST---------GQTNG
L---D-VP----------------GA--G-YAFNLQ--NCGV--S---------------
-------------SPTGAP--AIMPPS-QFLAHPA-------AD--LSSPLTS-------
----------------------------------------CSQ---L-------------
-----------------------GY---RQLDPI----------------P-DIPR----
------------------------------------------------------------
-------------------------------Y-PW-M------------TLAG-------
--------------------------------------------------PN--------
-----------------GCPRRR-------------------------------------
------------------------------------------------------------
-----------------------------GRQTYTRFQTLELEKEFHFNHYLTRRRRIEI
AHALCLTERQIKIWFQNRRMKLKKE------------LR---------------------
---------------------------------AVKEINEQA------------------
------------------------------------------------------------
------------------------------------------------------------
------------------------------------------------------------
---------------------RNEA-----------------------------------
------------------------------------------------------------
------------------------------------------RS----KD----------
----------TDDDPKRKRQEGKHFQEK-----------SKKDSPQ--------------
--------------------------------------------------------KEE-
-------------EDLPPQM--SPRSDN-GETPSPR---KEKDIVVTE------------
-----------------------------------------------ESLSPSSDT----
----------------PPSESNTRP-----------------------------------
------------------------------------------------------------
------------------------------------------------------------
-------------------------------------------------------
>lcl|Query_10035
------------------------------------------------------------
------------------------------------------------------------
------------------------------------------------------------
------------------------------------------------------------
------------------------------------------------------------
------------------------------------------------------------
--------------------------MS----------SYFT--GPYLTDIRSGSG-EH-
-------YNG--QPVHT-------QPNGEP-----CDQTQRQYI-Q--PQYA-S-SPAQG
A-TYPRFPPYDRLEIRPITS-TPNSPSPPGPYYGNQCAQQHQP--PP-----PQPAHQP-
Q-HAP------------LSHPNAYVPQ-DG-------Q-NCRGSP---NDHGSQ-HQNMA
PVQYP-SCKMQ------------QPPQQMTHDPNG-VHRTVAS-DC---PTNMHHQQ--Q
P-----------CQSP--VH-SP-----PQ-MYTA---------NHVAPTN-------QP
NAVSQVQTPSSGALPSP------------LY-----------------------------
---------------------------------PW-MRSQ--------------------
------------------------------------------------------------
------------------------------------------------------------
---------------------------------------------FER------------
---------------------------KRGRQTYTRYQTLELEKEFHFNRYLTRRRRIEI
AHALCLTERQIKIWFQNRRMKWKKE-NKAKLE-AGLVMGATAP-ELTHH-PDRPPQ----
------------------------------------------------------------
------------------------------------------------------------
------------------------------------------------------------
------------------------------------------------------------
------------------------------------------------------------
------------------------------------------------------------
------------------------------------------------------------
------------------------------------------------------------
------------------------------------------------------------
------------------------------------------------------------
------------------------------------------------------------
------------------------------------------------------------
------------------------------------------------------------
------------------------------------------------------------
-------------------------------------------------------
>lcl|Query_10036
------------------------------------------------------------
-MNSNVVYST---------MCHSNDPT---G--YATEPYG-AD---------LATQVY--
-YPQTPDPL-------SNAGNHYLS--------S-----GLVSSYPSASDPRTPPLHGDA
TNGHHP--HQ--IINDSN-GLSYTNL-DPSPFG---------------------------
------------------------------------------------------------
-----------------------------------HQT----------------------
--------RVPN--LGPPHHAGNPGLQAG-------------------------------
-------YGP---T--AELG-----------PR-------STFSY----------R---S
L---D-Y------------------E-VNH---PLHDHHGSV------------------
-------NLATDCGRV--SS---GLGS-AY-PYLD-------PL---GLPRRNGY-GYH-
-DGFD-----------------------------PSMRDSCQL-----------------
---------------------NGGY--PN-SPPLVR------Q---ASATS--VPT----
------------------------------------------------------------
-------------------------------Y-KW-M------------QVKRS------
-------VPKP-ATK---T------DY-------------------GFSGGGAAIATNGG
G---------------GGGGG---------------------------------------
------------------------------------------------------------
--------------------------PGSGRTNFTTKQLTELEKEFHFNKYLTRARRIEI
ATALQLNETQVKIWFQNRRMKQKKR------------MK---------------------
---------------------------------E--GL-IPS------------------
------------------------------------------------------------
------------------------------------------------------------
------------------------------------------------------------
---------------------E-PT-----------------------------------
------------------------------------------------------------
------------------------------------------AK----EN----------
---------------------------S-----------PTAASG---------------
------------------------------------------------------------
--------------------NTANPTVPP--------------SVGTTP-----------
-----------------------------------------------LASKDSNQ-----
------------------------------------------------------------
------------------------------------------------------------
------------------------------------------------------------
-------------------------------------------------------
>lcl|Query_10037
------------------------------------------------------------
------------------------------------------------------------
------------------------------------------------------------
--------MTSS-FMDGVLGTKF-------------ATD--PTS----------------
------SPGAL----------------PGYG----------------HT------QH---
----------------------RMYPYVSLSPQSSMSV----------------------
--------TGNLYYTSN-------------------------------------------
A-D----FA-----------------------K------SCRYTSA---------QS-NG
L---D-GT----------------SA--G-YSFNLQ--NCAA----A-----------AA
AAVAV--------SGPAST-PTMMAPS-QFFPHPA-------SA-DLGSPITS-------
----------------------------------------CAQ---L-------------
-----------------------GM---RQLEPL----------------P-DVPR----
------------------------------------------------------------
-------------------------------Y-PW-M------------SIAG-------
-----------------------FAENAS------------------IKCPN--------
-----------------GCPRRR-------------------------------------
------------------------------------------------------------
-----------------------------GRQTYTRFQTLELEKEFHFNHYLTRRRRIEI
AHALCLTERQIKIWFQNRRMKLKKE------------LR---------------------
---------------------------------AVKEINEQA------------------
------------------------------------------------------------
------------------------------------------------------------
------------------------------------------------------------
---------------------RLEA-----------------------------------
------------------------------------------------------------
-------------------------------------------K----LK----------
----------DQHGSSKE----NK--DR-----------EESTDHE--------------
--------------------------------------------------------KSA-
------------------PK---------TGDTERE---KET-GPSDVT----------V
A----------------------------------------------A-EDSKSRS----
----------------P------HP-----------------------------------
------------------------------------------------------------
------------------------------------------------------------
-------------------------------------------------------
>lcl|Query_10038
------------------------------------------------------------
--------------------------------------------MMNSYFDQ-SGFYN--
-SQGSA-----------------------EQPYR-FPQGLLVPPYP-QPSAARTAHD---
---PSYV--------------------------------------------D-G-SSSTA
SA---------------------------CK----------------LYTS----D-GT-
SV-FK------------AECLT---KEQN-GFNQAVKE----------------------
--------MAT-WSP-SALAGVRP------------------------------------
AA-----MSN---D--PMRS---------FP--------TGD------------------
------------------------------------------------------------
--------------TSATPR--VSDA--------W-------SQ-CCQN-----------
------------------------------------------------------------
-------------------------------PPA------------VAQAPT-NAF----
------------------------------------------------------------
-------------------------------Y-PW-------------M-----------
----AIA------------G---SFG----------------------------ANGL-R
------------------------------------------------------------
------------------------------------------------------------
---------------------------RRGRQTYTRYQTLELEKEFHTNHYLTRRRRIEM
AHALCLTERQIKIWFQNRRMKLKKE------------IQ---------------------
---------------------------------AIKELNEQER--------QAQAAKLA-
------------------------------------------------------------
------------------------------------------------------------
------------------------------------------------------------
--------------------AQQS------------------------------------
------------------------------------------------------------
---QT-----------------------------------QQSQ----KSQQ-------S
QQQGPPPASA--TTKASND-TSA---TVKT------------------------------
------------------------------------------------------------
------------------------------------------------------------
------------------------------------------------------------
------------------------------------------------------------
------------------------------------------------------------
------------------------------------------------------------
-------------------------------------------------------
>lcl|Query_10039
------------------------------------------------------------
------------------------------------------------------------
----MAKRRCHGGSR-----RWIIVERNVAVIGHTLVNQRRRSRKRIKMN---GSLY-ED
TSN-SRS----------------------------------SLDVVQP----TQ-P--AL
QP----GPLHI----------------PAKR----------------VA-TT---LAVS-
-YAHP-------------DCG--V--DPS-G-----------------------------
-----------GVIR-HSH-S---GQPWG-------------------------------
YT------DT---A---------------FDGH------T-QYNQ----------S-LCN
V---R--E----------------GM-TSGYYYNDHAAR---A-AAA-----------AA
DRKPP--IKFWPNT-YELPS--AGP---S-TVAPT-------DT-C-QS-FAPQT--WCN
YSPYS--GRVP-SHM------------------EP--HA-PQP---V-----AYLP-GDD
--RTRAPMD--------------G---FPHADG--YTI---RT--FA--TEP-HSV----
------------------------------------------------------------
-------------------------------P-TY-V-----------PAGTV-------
-------------------------------------------GDVMTTNPLEWTGNVTV
------------------------------------------------------------
------------------------------------------------------------
---------------------------RKKRKPYSKFQTLELEKEFLFNAYVSKQKRWEL
ARNLNLTERQVKIWFQNRRMKSKKN------------SQ---------------------
----------------------------------RNAENNQNN--------NNTTSGSG-
------------------------------------------------------------
------------------------------------------------------------
------------------------------------------------------------
--------------------AVQNN-----------------------------------
------------------------------------------------------------
---VS-----------------------------------GPVT----K-----------
------------------------------------------------------------
------------------------------------------------------------
------------------------------------------------------------
------------------------------------------------------------
------------------------------------------------------------
------------------------------------------------------------
------------------------------------------------------------
-------------------------------------------------------
>lcl|Query_10040
------------------------------------------------------------
------------------------------------------------------------
-----------------------------------------------MMN---GNLY-ED
TSP-GRS----------------------------------SLDVV------GS-IQPSL
Q------PLHI----------------PAKR----------------VTPTL----TVT-
-YGPP-------------DCGV-----------D---A----------------------
--------GTTGVIR-QGH----NGQPWG-------------------------------
YAS----AES---H--SAF----------DS--------HPQFSQ----------T-LCG
V---R--D----------------GM-APTYYYNDHATRT------------------TA
DRKTP--LKFWTNS-YELPG--TGSTN-V-SPV---------DT-C-QS-FASQT--LCS
YTPY--ASRVH-GQT------------------DP--HA-PQP---V-----TYFT-ADD
RPRA--PID--------------G---FSHVEG--YAL---RS--YST-SET-HVS----
------------------------------------------------------------
-------------------------------T-PY-M-----------PPGTV-------
------------------------------------------IESAAAPNPLEWTGGVTI
------------------------------------------------------------
------------------------------------------------------------
---------------------------RKKRKPYSKFQTLELEKEFLFNAYVSKQKRWEL
ARNLNLTERQVKIWFQNRRMKSKKT------------SQ---------------------
----------------------------------KNSENNQNN--------NNTTSSIQ-
------------------------------------------------------------
------------------------------------------------------------
------------------------------------------------------------
--------------------NGNSG-----------------------------------
------------------------------------------------------------
---SV-----------------------------------K-------------------
------------------------------------------------------------
------------------------------------------------------------
------------------------------------------------------------
------------------------------------------------------------
------------------------------------------------------------
------------------------------------------------------------
------------------------------------------------------------
-------------------------------------------------------
>lcl|Query_10041
------------------------------------------------------------
------------------------------------------------------------
------------------------------------------------------------
------------------------------------------------------------
------------------------------------------------------------
------------------------------------------------------------
--------------------------MS----------SYFT--GPYVTDIRSGTG-EH-
-------YNG--QPVHT-------QPNGEP-----CDQAQRQYI-Q--PQYA-S-SPAQG
A-TYPRFPPYDRLEIRPITS-TPNSPSPPGPYYGNQ---QHQP--PP-----PQPQ----
Q-HAP------------LNHPNAYVPQ-DG-------Q-NCRGSP---NDHGSQ-HQNMA
PVQYP-SCKMQ------------QMP----HDPNG-VHRTVTS-DC---PANMHHQQ--Q
P-----------CQSP--VH-SP-----QQ-MYTP---------NHVAPTN-------QP
NAVSQVQPPSSGALPSP------------LY-----------------------------
---------------------------------PW-MRSQ--------------------
------------------------------------------------------------
------------------------------------------------------------
---------------------------------------------FER------------
---------------------------KRGRQTYTRYQTLELEKEFHFNRYLTRRRRIEI
AHALCLTERQIKIWFQNRRMKWKKE-NKAKLE-AGLVMGATAP-ELAHH-PDRPPQ----
------------------------------------------------------------
------------------------------------------------------------
------------------------------------------------------------
------------------------------------------------------------
------------------------------------------------------------
------------------------------------------------------------
------------------------------------------------------------
------------------------------------------------------------
------------------------------------------------------------
------------------------------------------------------------
------------------------------------------------------------
------------------------------------------------------------
------------------------------------------------------------
------------------------------------------------------------
-------------------------------------------------------
>lcl|Query_10042
------------------------------------------------------------
------------------------------------------------------------
------------------------------------------------------------
----------------------------------------------------MS-----S
YQFVNSLT-S-------------------CY----------GQRSQDATGQDYYTPQVQ-
TYG---------------SCYS--------GPGS--PV-------------QQ-------
---YGP-YPQHNVQ---HL--Q-----------NG-----------DHH-YNSCS-----
-------------------------------------------------------Q--RL
-----------------------SHP------NPSQSPRTPTP-----SAT-PVPSCKY-
----------A-EPS--ASS-----------PQDL-----STSGSHPPPAGSP-------
------------E-------------SR-SSPQPPRHT--PQP-QQP--HHQQQQQQQQQ
QQPSPNQSQNQQS--------QHSP---HHQP----QSPHSQQQGQ-----QT-Q-----
--------------QKTSYPAGNPPQ----------------------------------
------------------------------IY-PW-MR----------------------
-------KVHVGQN----------------------------------------------
------------G-----------------------------------------------
----------VNAM-------------------------------GET------------
---------------------------KRQRTSYTRYQTLELEKEFHFNRYLTRRRRIEI
AHALCLSERQIKIWFQNRRMKWKKE-----------------------------------
------------------------------------------H----------KMAST--
MPPQI-------------------------------------------------------
------------------------------------------------------------
-------------------------------------------PQVM--PDHH---HH--
--------------PH------LHG----------------------ETKA---------
------------------------------------------------------------
------------------------------------------------------------
------------------------------------------------------------
------------------------------------------------------------
------------------------------------------------------------
------------------------------------------------------------
------------------------------------------------------------
------------------------------------------------------------
------------------------------------------------------------
-------------------------------------------------------
>lcl|Query_10043
------------------------------------------------------------
------------------------------------------------------------
------------------------------------------------------------
------------------------------------------------------------
------------------------------------------------------------
------------------------------------------------------------
--------------------------MS----------SYYT--NSYLPDLRNNGEHYA-
-------VNG--QTVHS-------QPNGEI-----CDQSQRQYI-Q--PQYA-S-SPAQG
A-TYPRFPPYDRLEIRPITS-APSTPSPPGGYYGNPCNQQPPG--S-L----PQPAHQPP
P-HPP------------LNHPNAYVPQ-DG-------Q-NCRGSP--NDPAAPQ-HPNMS
PASYP-SCKMQPQQ--------PHPPQPMGHDPNG-IHRPINS-EC-------PTSM--P
P-----------CQSP--VQSTP-----QQ-MYTP---------NHPAPPN-----QPNP
VQ-----PPPGGALPSP------------LY-----------------------------
---------------------------------PW-MRSQ--------------------
------------------------------------------------------------
------------------------------------------------------------
---------------------------------------------FER------------
---------------------------KRGRQTYTRYQTLELEKEFHFNRYLTRRRRIEI
AHALCLTERQIKIWFQNRRMKWKKE-NKAKLE-AGLTMG-TPP-ELTHL-PEHPPQ----
------------------------------------------------------------
------------------------------------------------------------
------------------------------------------------------------
------------------------------------------------------------
------------------------------------------------------------
------------------------------------------------------------
------------------------------------------------------------
------------------------------------------------------------
------------------------------------------------------------
------------------------------------------------------------
------------------------------------------------------------
------------------------------------------------------------
------------------------------------------------------------
------------------------------------------------------------
-------------------------------------------------------
>lcl|Query_10044
------------------------------------------------------------
------------------------------------------------------------
------------------------------------------------------------
------------------------------------------------------------
------------------------------------------------------------
------------------------------------------------------------
------------MIMSAYLMNSPAY---------------GDPKFPPSEEYSQGNYIPSH
S-G--EYYT----------------------------PQQ-H---------PY---GY--
V---NSP--HGAVNYG--Q--ENGGP---AYTDHGGSP---HY---------YRHPCGMA
PNP---V-PMSRPPGLPPTIEHI-PP--SHSPLPI-------L----QQHQQ--------
---------RSPV----------------SSPGLPRVQHPPPP--VQ-LPQHPQHQPPLP
P--HHHPHPHHHHHHH----HNQTQ--PQQPPQPQQPPGLSSPDCVASSGGG--P-----
------------------------------------------------------------
----------------------------PVIY-PW-MK----------------------
-------KVHVGTV----------------------------------------------
------------------------------------------------------------
-----------NGT-FA---------------------------GVEP------------
---------------------------KRQRTAYTRHQILELEKEFHFNRYLTRRRRIEI
AHSLCLSERQIKIWFQNRRMKWKKD-NKLPNT-KNVKKKNQQ------------------
---------------------------------NQG-QNQNQN-T---------ANQR--
--NQPPPP----------------------------------------------------
------------------------------------------------------------
-------------------------------------------Q----------------
-------------------APPAPP----------------------PPPLPPPL-----
-----QQM-----------------------------------------LPPQSQ-----
-PS---------------------------------------------------------
----------------PID-KSDYGLTEL-------------------------------
------------------------------------------------------------
------------------------------------------------------------
------------------------------------------------------------
------------------------------------------------------------
------------------------------------------------------------
------------------------------------------------------------
-------------------------------------------------------
>lcl|Query_10045
------------------------------------------------------------
------------------------------------------------------------
------------------------------------------------------------
------------------------------------------------------------
------------------------------------------------------------
------------------------------------------------------------
------------------------------------------------------------
------------------------------------------------------------
------------------------------------------------------------
------------------------------------------------------------
------------------------------------------------------------
------------------------------MES---GCESGFINSQPSMAEFMTAL----
PHINETFHR--RSSIN---QPVMPPPT--------LCQLENTNQLHSAPTVCAATP----
--PSPSPPNKLPSSASS---GF-NVNV--PEY-PW-MKEKK----------TTR------
-------KQHQ-------------------------------------------------
------------------------------------------------------------
-------ETTENGM---------------------------------P------------
---------------------------RRLRTAYTNTQLLELEKEFHFNKYLCRPRRIEI
AASLDLTERQVKVWFQNRRMKHKRQ-TMMNK---NSDEK----GG-GGGSGSSSNASDGG
GPGGVVPQPPPTDSGSDGATGGDSNEPDLDSDHGMSTSRSPFP-DQTGTSKDHSTLTNST
ADSDAGDSCCGPTP----------SP-AKPDVVLTPTALDGG--EKPPGTAPLHSPSV--
GGP----SL-GLTPSPGQS--------ERRSTPSKGT----------TDGGATAPSVSTA
S-VSRSITMCCETVPSIPPSSIGRGMCHIGGGQPTVSTAK----MVPL------CPMEV-
NGPTCQAPC-NPMNCP-PTPPNVQA--TSPTAGYPGG----PHP-CPTGQMVPSPNCQRP
--RMYSG--PYPPD---PGVNVSGYTQPSHPVPSPPMA-PPY---CY-RTPPPH---QQP
PPPQPQQQMDNSYGIHIPQTGGYKMAPSPNSVYYPP---TGQPPGQPHMAQPLTNGCPQP
TSMGPHQSNVYPVQHGPHMQVPQGGGNVPMMNQTP----PMQQRSSLPPQQQQQQQQQRN
A----YHYSNAVDSMGSQAMESPTQT--QQPPSQQYMQDY--RG-P-TPDYTQTRSYNG-
-----YEQDPNAMNGD-Y---MS--PNG-MANNGGYCY---A-PYRN--DGYAVDDGNGL
MPPNNVQNVYYDMN-----S---VHS--DSSRVPDYA--ATAPKQNVQQQQNSGGYYDMN
SSVADTANIP-SY---NGSPDRYNGQC----TAEGDFSYSY--Y-DTDCYSS--------
---------NNTS----------CGTNDFNFL-NIANDYSS-SDYYQLS-----------
------------------------------------------------------------
-------------------------------------------------------
>lcl|Query_10046
------------------------------------------------------------
------------------------------------------------------------
------------------------------------------------------------
------------------------------------------------------------
------------------------------------------------------------
------------------------------------------------------------
------------------------------------------------------------
------------------------------------------------------------
------------------------------------------------------------
------------------------------------------------------------
------------------------------------------------------------
------------------------------------------------------------
------------------------------------------------------------
------------------------------------------------------------
------------------------------------------------------------
------------------------------------------------------------
------------------------------------------------------------
-----------------------------TRQTYTRFQTLELEKEFHYNKYLTRRRRIEI
AHALGLTERQIKIWFQNRRMKAKKE------------NK---------------------
-----------------------------------GHEETG-------------------
------------------------------------------------------------
------------------------------------------------------------
------------------------------------------------------------
------------------------------------------------------------
------------------------------------------------------------
------------------------------------------------------------
------------QPTLPLG--VNPIKDVNHEGAIVIS-----------------------
------------------------------------------------------------
------------------------------------------------------------
------------------------------------------------------------
------------------------------------------------------------
------------------------------------------------------------
------------------------------------------------------------
-------------------------------------------------------
>lcl|Query_10047
------------------------------------------------------------
-MNSSAVYAG---------MCRNGDTA---G--YNSQPYG----------SELAAQVY--
-YQQPGEP-----------AGPYFG--------S-----GIVGTYSAGSTPRTPPLHGDT
PRGHAV--QQ--IINESN-GLSYTNL-DQQAAG---------------------------
------------------------------------------------------------
------------------------------Y----GQQ----------------------
--------RVNHTSSGGTSLHPTYGPVTD-------------------------------
-------VTT---R--PP---------------------HHGTTY-----------HCRN
L---D-YH----------------HD-LNSHSVHQPADHQGI------------------
-------SLGVESARV-VPTFGV-STT-AY-TYLD-------SL---GLPRRNGY----V
YDSFD-----------------------------PTLRDNCQV-----------------
---------------------NGGY--QY-STAVGRPR--VAT---IQPSP--VPT----
------------------------------------------------------------
-------------------------------Y-KW-M------------QVKRS------
-------LPKP-SSK---L------DY-------------------GLNSGD--------
V---------------AGGPG---------------------------------------
------------------------------------------------------------
----------------------------SGRTNFTTKQLTELEKEFHFNKYLTRARRIEI
ATALQLNETQVKIWFQNRRMKQKKR------------MK---------------------
---------------------------------E--GL-VPT------------------
------------------------------------------------------------
------------------------------------------------------------
------------------------------------------------------------
---------------------D--S-----------------------------------
------------------------------------------------------------
------------------------------------------SP----EG----------
---------------------------G-----------ATTPAP---------------
------------------------------------------------------------
--------------------NSASAPPPP--------------SAVSSA-----------
-----------------------------------------------LTTSDSSSQ----
------------------------------------------------------------
------------------------------------------------------------
------------------------------------------------------------
-------------------------------------------------------
>lcl|Query_10048
------------------------------------------------------------
------------------------------------------------------------
------------------------------------------------------------
------------------------------------------------------------
------------------------------------------------------------
------------------------------------------------------------
------------------------------------------------------------
------------------------------------------------------------
------------------------------------------------------------
------------------------------------------------------------
------------------------------------------M---T-----DCCQE-VN
YP---DLPK--------------TC--Y---QLHPALA-YMNSYDPAMVASSGYGY----
------------------------------------------------------------
-------------------------------N-TV-----------QECSQRNGYHPSHV
LQHRAP---EGHLGPAEVRPVIPLLASHPYTL---SPQQPAEMSPCLSRPSSQESVQYFP
SFQDDSSEKN-QLLHQS-SDGDD-------------------GSKTSFLWVRDTSRP---
TARQFP---VQPLS-----------------QQLVA------------------------
---------------------GEQ-PIKRARTAYTSSQLVELEKEFHFNRYLCRPRRVEM
ASLLNLTERQIKIWFQNRRMKFKKE------------QKA--------------------
-----------------------------------KGFLSE-K------TPSPPMGSLS-
------------------------------------------------------------
------------------------------------------------------------
------------------------------------------------------------
--------------------SS--P-----------------------------------
------------------------------------------------------------
---IS-----------------------------------QPTS----PATA-------S
PA----T-SSNTPASVSVPGSGTTSPCVP-----PNPRGAIMPPQPPPSDPTCPWPIMEN
------TSGHLTHG-CLV-TDSQQQPHPF----------HPHLLSTSSPA--------CH
QQHQPMQSVGTP------PHHQEQP--------PRLYHPDASISQEAAPQHQFSFPPSDP
AAQNQLSQNHQFSSYQPRLTPEYRLDNRNRSSEYLIHSVPNPNLCPNDIGDLASKQQRFQ
QSSGPDFSCTGHPLMLADTDSNIITSVESEPPCGPPLYFEQ--MNSDWDIFRSRVREEHL
RFPP----PPRLTHL---------------------------------------------
------------------------------------------------------------
-------------------------------------------------------
>lcl|Query_10049
------------------------------------------------------------
------------------------------------------------------------
------------------------------------------------------------
----------------------------------------------------MS-----S
YQFVNSLT-S-------------------CY----------GQRGQETASPDYYSPPVQ-
AYG---------------SCYN--------GPVS--PV-------------QQ-------
---YGS-YSQSGVP---HL--Q-----------NG-----------DHH-FTSCS-----
-------------------------------------------------------Q--RL
-----------------------THP------NPSQSPRTPTP-----SAT-PVPSCKY-
----------A-ESS--ASS-----------PQDL-----STSGSHPTAPGSP-------
-----------DD-------------SS-SSSPRHVPP--SQQ-NQPKHLSQHQQSTSPQ
QAQQPSPSPPSSQ--------AQQQ---SQPTTQP----ASQQQQQTSSPSQQSQ-----
--------------QKTSFPAANPPQ----------------------------------
------------------------------IY-PW-MR----------------------
-------KVHVGQN----------------------------------------------
------------G-----------------------------------------------
----------VNAM-------------------------------GET------------
---------------------------KRQRTSYTRYQTLELEKEFHFNRYLTRRRRIEI
AHALCLSERQIKIWFQNRRMKWKKE-----------------------------------
------------------------------------------H----------KMANS--
IPPQL-------------------------------------------------------
------------------------------------------------------------
-------------------------------------------PQVL--PDHHPH-----
----------------------LHS----------------------ETKA---------
------------------------------------------------------------
------------------------------------------------------------
------------------------------------------------------------
------------------------------------------------------------
------------------------------------------------------------
------------------------------------------------------------
------------------------------------------------------------
------------------------------------------------------------
------------------------------------------------------------
-------------------------------------------------------
>lcl|Query_10050
------------------------------------------------------------
------------------------------------------------------------
------------------------------------------------------------
--------MTSN-FMDSFLANKY-------------TPDA--VS----------------
------SAA-L----------------QGYG----------------H-P-----QH---
----------------------RLYPYASLSPSSSVAV----------------------
--------SGTLYYTSN-------------------------------------------
A-D----LA-----------------------K------SCRY-ST---------GQTNG
I---D-VP----------------TA--G-YAFNLQ--NCGV--S---------------
-------------APTGAP--AIMPPS-QFLAHPT-------AD--LSSPLTS-------
----------------------------------------CSQ---L-------------
-----------------------GY---RQLDPI----------------P-DIPR----
------------------------------------------------------------
-------------------------------Y-PW-M------------TLAG-------
--------------------------------------------------PN--------
-----------------GCPRRR-------------------------------------
------------------------------------------------------------
-----------------------------GRQTYTRFQTLELEKEFHFNHYLTRRRRIEI
AHALCLTERQIKIWFQNRRMKLKKE------------LR---------------------
---------------------------------AVKEINEQA------------------
------------------------------------------------------------
------------------------------------------------------------
------------------------------------------------------------
---------------------RMEC-----------------------------------
------------------------------------------------------------
------------------------------------------RS----KD----------
----------RDDDPKKKRQEGKQLQEK-----------SKNES-S--------------
--------------------------------------------------------KDD-
-------------EDLQPPLALSPHSEGKGTSPEAL---KEKDIIVTE------------
-----------------------------------------------DSLSPRSDS----
----------------PP-ESNSRP-----------------------------------
------------------------------------------------------------
------------------------------------------------------------
-------------------------------------------------------
>lcl|Query_10051
------------------------------------------------------------
------------------------------------------------------------
------------------------------------------------------------
------------------------------------------------------------
------------------------------------------------------------
------------------------------------------MLIPPSGRSQHTVKRQPQ
RKIISIQFTQKLMIMSSFLMNSPPY---------------VDPKFPPTEEYSQGNYIPSH
G-G--DYYT----------------------------PQH-H---------PY---GYS-
V---NGP--HAGVNYG--Q--ENGGP---GYTNHGSSP---HY---------YQHSCSLT
QNT---VTPLSRPNTLT-AIDHV-PP--NHSPGPM-------L-TGPQQH----------
---------RSPV----------------SSP--------PPG--AV-LARHPMHHAPLP
----HHPSHPH-----------------QQPPPLQQQTG-PNSNCNLS-GSG--H-----
------------------------------------------------------------
----------------------------PVIY-PW-MK----------------------
-------KVHINTA----------------------------------------------
------------------------------------------------------------
-----------NGT-FT---------------------------GIEP------------
---------------------------KRQRTAYTRHQILELEKEFHFNRYLTRRRRIEI
AHSLCLSERQIKIWFQNRRMKWKKD-NKLPNT-KNVKKKQ-N------------------
---------------------------------NQS-ANHAQQ-----------------
------PP----------------------------------------------------
------------------------------------------------------------
-------------------------------------------P----------------
-------------------PPPSQQ----------------------PAPQQQPP-----
-----HMM-----------------------------------------APPHPQ-----
-PP-P-P-----------------------------------------------------
-------------PPPPIDPKDDYGLTEL-------------------------------
------------------------------------------------------------
------------------------------------------------------------
------------------------------------------------------------
------------------------------------------------------------
------------------------------------------------------------
------------------------------------------------------------
-------------------------------------------------------
>lcl|Query_10052
------------------------------------------------------------
-MNSNVVYSS---------MCHSSDPG---G--YGPESYG-AD---------LAAQVY--
-YQQTPDPL-------ASAGNHYLS--------S-----GLVSSYPAAPDPRTPPLHGDA
SNGHIP--HQ--IINDTN-GLSYTNL-DPPPFG---------------------------
------------------------------------------------------------
-----------------------------------HQS----------------------
--------RVPN--LGPPHP--NPGLQAS-------------------------------
-------YGP---A--GDLG-----------PR------GSTFSY----------R---S
L---D-Y------------------E-VNHALHPAHDHHSSV------------------
-------NLATDCGRV--SSVSAGLGS-TY-PYLD-------PL---GLPRRNGY-GYH-
-DGYD-----------------------------PSMRDSCQL-----------------
---------------------NGGY--PS-SPPLAR------Q---APSAA--VPT----
------------------------------------------------------------
-------------------------------Y-KW-M------------QVKRS------
-------VPKP-ANK---T------DY-------------------GFSGGGTTMTTNGG
G---------------G-------------------------------------------
------------------------------------------------------------
--------------------------PGSGRTNFTTKQLTELEKEFHFNKYLTRARRIEI
ATALQLNETQVKIWFQNRRMKQKKR------------MK---------------------
---------------------------------E--GL-IPT------------------
------------------------------------------------------------
------------------------------------------------------------
------------------------------------------------------------
---------------------E-PS-----------------------------------
------------------------------------------------------------
------------------------------------------AK----EN----------
---------------------------S-----------PTAVGS---------------
------------------------------------------------------------
--------------------NAGNPAVPP--------------SVGTTP-----------
-----------------------------------------------LASKDSNQ-----
------------------------------------------------------------
------------------------------------------------------------
------------------------------------------------------------
-------------------------------------------------------
>lcl|Query_10053
------------------------------------------------------------
---------------------------------------------MSSHF----------
------------------------------------------------------------
-----------------------------------------------------------S
NI----SPNNW----------------TNSS----------------QDQFYSQS---A-
KYAMS------------YN---DNHYGQ---YNPSSHF----------------------
--------AA-RYS------------P-Y------------------------------S
RID----GPN---I--P--------------AK------TPPYDQS---------T----
V---P--Y----------------EI-GHQNFYATPLPARPE----------------VS
PTVPVD-SPEFS-------------------------------S-CKLASFG--------
------------------------------------------A---T-----CNSNSQYD
SSPT---IT---------------Q--SYASRPL--ES---TS--PIQSPSKP-NI----
------------------------------------------------------------
-------------------------------Y-PW-M-----------KSYTD-------
------------------------------------------------------S-GQGP
------------------------------------------------------------
------------------------------------------------------------
---------------------------KRTRQTYTRYQTLELEKEFHFNRYLTRRRRIEI
AHALGLTERQIKIWFQNRRMKAKKE------------NK---------------------
----------------------------------LQ-PTLPH------------------
------------------------------------------------------------
------------------------------------------------------------
------------------------------------------------------------
------------------------------------------------------------
------------------------------------------------------------
------------------------------------------------------------
------------------------------------------------------------
----------------------------------------SSDDVLTARDTKDYLSNHKQ
------------------------ETVNS-------------------------------
------------------------------------------------------------
------------------------------------------------------------
------------------------------------------------------------
------------------------------------------------------------
-------------------------------------------------------
>lcl|Query_10054
------------------------------------------------------------
------------------------------------------------------------
------------------------------------------------------------
------------------------------------------------------------
------------------------------------------------------------
------------------------------------------------------------
------------------------------------------------------------
------------------------------------------------------------
------------------------------------------------------------
------------------------------------------------------------
---------MHEVRY------------------DSFKSDQGSE---M-----ELTNDSQV
IYTRH---Q--------------TG--CTSFSENSPPP---CG----SQSQA-PQM----
------------------------------------------------------------
-------------------------------G-PT-QPISYQGVPSTQPPGAV-------
-----------------CVGRPQQTSEFP-L--------------------LVASNGVVG
QKHVGEPAAF--GHFERDNPHC------------------------VFPWMQN---SKMG
SRPRHLSCEVAKHP-----------------TSLFH------------------------
---------------------RADELTKRVRTSYSPAQLVELEKEFHFNRYLCRPRRVEM
ATMLQLTERQIKIWFQNRRMKFKKD------------QKI--------------------
-----------------------------------KGLLP-RE------IPSPHSTGDS-
------------------------------------------------------------
------------------------------------------------------------
------------------------------------------------------------
------------------------------------------------------------
------------------------------------------------------------
---RS-----------------------------------PPT-----------------
--------------------NP-SPLPVILPSTMVDSNGSCIQNFQQESVEKQEIKLQSL
LSLRKISTFHSNCP---NEYK-------PSRENGMSP---TGDNLKNGSNNLYQVHHLSS
ALSRVVYTNV--SHEAGGCMPIT--RLQSVEDATDVQIPTSGIE-------SMSIEESNT
SIKIQQSTLF------NECSHSFSPSNH--TTDPSFPMSDMEASCGSSHKGSKRKQVDES
QDVKPCIFEELHNRKKFTPFTLPPS----ITPQNVYREFPPQP-----NF--FPSGYGQF
IEGWLP------------------------------------------------------
------------------------------------------------------------
-------------------------------------------------------
>lcl|Query_10055
------------------------------------------------------------
------------------------------------------------------------
---------MKINWF-----GAGEEEPFPSGATA------------EAMNGGTG--Y-ED
SAT-RNG----------------------------------SEAT-------GS-TL---
Q------PLHI----------------PAKR----------------PTPTD---LAVT-
-Y----------------DC-D-----------P--------------------------
-----------GVIR-HGGPH--NGQTG--------WG---------------------Q
SYT----PET---H--SAFV---------D--H------VPQYNH----------QQLCN
V---R--D----------------GV--TSYYY----DRK------------------PP
QTSS---IKFWSNS-YD-----AGPST-V-TPVPT-------DA-C-QS-FGSQS--WCN
YPPYP-GTRVH---M------------------EP--HT-PQP---V-----TYF--TED
RPRVPGPMD--------------TV--YPQTDT--YGL---RS--FPT--DV-HCP----
------------------------------------------------------------
-------------------------------T-TY-V-----------QTASG-------
------------------------------------------SEAMTTTNPLEWTGTVTV
------------------------------------------------------------
------------------------------------------------------------
---------------------------RKKRKPYSKFQTLELEKEFLFNAYVSKQKRWEL
ARNLNLTERQVKIWFQNRRMKSKKT------------SQ---------------------
----------------------------------RNAENNQNN--------TNTANNSS-
------------------------------------------------------------
------------------------------------------------------------
------------------------------------------------------------
--------------------NSQQH-----------------------------------
------------------------------------------------------------
---SA-----------------------------------AAKL----SA----------
------------------------------------------------------------
------------------------------------------------------------
------------------------------------------------------------
------------------------------------------------------------
------------------------------------------------------------
------------------------------------------------------------
------------------------------------------------------------
-------------------------------------------------------
>lcl|Query_10056
------------------------------------------------------------
------------------------------------------------------------
------------------------------------------------------------
------------------------------------------------------------
------------------------------------------------------------
------------------------------------------------------------
--------------------------MS----------SYYT--NSYMHDLRSPGGVEQ-
-------YNG--QPIHN-------QPNGDM-----CDQGQRQYI-Q--PQYA-S-SPVQG
N-THPRFPPYDRLEIRPITS-SPNSPSPPNQYYGNPCNLAPPG--PPL----PQPAHQPP
Q-HPQ------------MSHPNAYVPQ-DG-------QNNCRGSPQHHDPQ---------
--QYP-SCKMQPQPVPHG---P-HPPQPMGHDPNGAVHG--------------PNAM--P
P-----------CQSP--VQQSP-----QQ-PPQPPPQQPPMYQNHGGPPP--NQQQVQQ
QQQQQVQPPQPGNMPSP------------LY-----------------------------
---------------------------------PW-MRSQ--------------------
------------------------------------------------------------
------------------------------------------------------------
---------------------------------------------FER------------
---------------------------KRGRQTYTRYQTLELEKEFHFNRYLTRRRRIEI
AHALCLTERQIKIWFQNRRMKWKKE-NKAKLE-AGLAIGPTPP-ELTHL-GEHPPQ----
------------------------------------------------------------
------------------------------------------------------------
------------------------------------------------------------
------------------------------------------------------------
------------------------------------------------------------
------------------------------------------------------------
------------------------------------------------------------
------------------------------------------------------------
------------------------------------------------------------
------------------------------------------------------------
------------------------------------------------------------
------------------------------------------------------------
------------------------------------------------------------
------------------------------------------------------------
-------------------------------------------------------
>lcl|Query_10057
------------------------------------------------------------
------------------------------------------------------------
------------------------------------------------------------
------------------------------------------------------------
------------------------------------------------------------
------------------------------------------------------------
------------------------------------------------------------
------------------------------------------------------------
------------------------------------------------------------
------------------------------------------------------------
------------------------------------------------------------
------------------------------MEA-A-AMESGFINSQPSMAEFMTAL----
PHINESFR--GGSSITGAA---AVTPAP---P--------Q---RAPAA--ESPPE-A--
--PKHA-----------NGYSPAGVAV--PEY-PW-MKEKK----------TTR------
-------KQQQ-------------------------------------------------
------------------------------------------------------------
-------ETTDNGM---------------------------------P------------
---------------------------RRLRTAYTNTQLLELEKEFHFNKYLCRPRRIEI
AASLDLTERQVKVWFQNRRMKHKRQ-TSVMK----DDDK----D---------------G
VDRSL-------DSGSDIATGGDSNEPDLDSDHGMPS-RTPEH-----SNTSKDLMN---
LDSDAGESCCA--P----------SP-AKSDAIIK------D--SDQPPVTSLKSPPALP
TTV---VCPSMVSPSTMS--------LERRSTPNTQNDV------TPMPMEER-LPVNTM
T-ISLSHSTVCDSIPSQTTV-SRTISTYKP--NP-DISSN---KVPS---Q---HNVDI-
-----RPTT-TAVVSP-PSTNALYS--KSPSVPFPS----LPQENCTNNHVSPSPNYKRP
--RMYSG--PYPPD---PG--IGAYTPAGPVAASPPNG-PTY---CY-R--NPAPNHHSQ
PVHNQP-IDSSSYSTAI-QQRSYKAQH-QNNMPYYP--PQTSVQ-SSATSNQLPNACHPH
Q-N-----DMYSVPQR-N-SQIPDQSMMPQHQ------HYQQRSTVQ---QQQQQQQPQS
S----YAYNSDQSSAHYPVTDY---N--HTRSYDNYH-PQ--QDMSMNSDYI---PPGN-
-----------------QV-SNNVVNNG-------YCY---P-SYRG--ENYS-DNTNIM
PHQQDMHGMYYDMN-----S---ANT--DESNNAYVS--SQP-KTNLSQDSG---YYELQ
NPIQEGSAIS-DYA---ESQERFNSHA----E-----DFNYNCFSESECYSS--------
--------------------SNTCGTNDFNFL-NITNDYST-PEYYQLS-----------
------------------------------------------------------------
-------------------------------------------------------
>lcl|Query_10058
------------------------------------------------------------
----------------------------MMMNSSNAVYAGGVC---PQQP----PVVE--
-YGGEP--------------QLFYG--------DVGQQ-----HYGY-----TEPQTAEP
PNSHLP--HQ--IINEPN-GLSYTNL-DAGHAA---------------------------
------------------------------------------------------------
------------------------ATAYNPHRN---------------------------
-----------HNHHHQPYYPQASGHFYR-------------------------------
-----------------------------------------TFEY---------------
----D-GS-----------------PDVPTYHHPSYH-----------------------
--------------NLEAAGLGRRSSN-PY------------------ATGTPAY---EG
YEN-------------------------------QQASADCH------------------
----------------------------AM--AAFRTQ----T---PQQQH--HPT----
------------------------------------------------------------
-------------------------------Y-KW-M------------QVKRS------
-------LPKP-APK---P------EY-------------------GYNAGS------NT
S---------------PGNGAYT-GG-PTASNTNVAN-----------------------
------------------------------------------------------------
-----------------------GGTNGSGRTNFTTKQLTELEKEFHYNKYLTRARRIEI
ATALQLNETQVKIWFQNRRMKQKKR------------MK---------------------
---------------------------------E--GL-LVT------------------
------------------------------------------------------------
------------------------------------------------------------
------------------------------------------------------------
---------------------DVGS-----------------------------------
------------------------------------------------------------
------------------------------------------AK----EN----------
---------------------------S-----------PTACSTP--------------
------------------------------------------------------------
-------------------TLLHSPTASG--------------SAATSP-----------
-----------------------------------------------LSSKDANQ-----
------------------------------------------------------------
------------------------------------------------------------
------------------------------------------------------------
-------------------------------------------------------
>lcl|Query_10059
------------------------------------------------------------
------------------------------------------------------------
------------------------------------------------------------
----------------------------------------------------MS-----S
YQFVNSLT-S-------------------CY----------GQRSQDSSSQDYYTPQVQ-
SYG---------------GCYS--------GPGS--PV-------------QQ-------
---YGP-YPQHSVP---HL--Q-----------NG-----------DHH-FNSCS-----
-------------------------------------------------------QT-RL
-----------------------N--------NPSQSPRTPTP-----SVT-PVPSCKY-
----------A-EPS--AAS-----------PQDL-----STSGGHQP--GSP-------
-----------AE-------------SR-TSPQPARQQ--T----SPT----QQSST--Q
QSSGPQQTSPQQT--------PQGP---QESA--------SPQAGQ-----QQ-------
---------------KTPYP-NNPPQ----------------------------------
------------------------------IY-PW-MR----------------------
-------KVHVGQN----------------------------------------------
------------G-----------------------------------------------
----------VNAM-------------------------------GET------------
---------------------------KRQRTSYTRYQTLELEKEFHFNRYLTRRRRIEI
AHALCLSERQIKIWFQNRRMKWKKE-----------------------------------
------------------------------------------H----------KLAST--
MPPQI-------------------------------------------------------
------------------------------------------------------------
-------------------------------------------PQVM--ADHHPHHHH--
--------------PHHHHAHHLHG----------------------LNQVSPVYTKYT-
------------------------------------------------------------
------------------------------------------------------------
------------------------------------------------------------
------------------------------------------------------------
------------------------------------------------------------
------------------------------------------------------------
------------------------------------------------------------
------------------------------------------------------------
------------------------------------------------------------
-------------------------------------------------------
>lcl|Query_10060
------------------------------------------------------------
------------------------------------------------------------
------------------------------------------------------------
--------MSSNSFMDSFLGSKY-------------ASDA--VS----------------
------SAAAL----------------QGYG----------------HHP-----QH---
----------------------RMYPYGSLSPQSSVAV----------------------
--------SGTLYYTSN-------------------------------------------
S-D----LA-----------------------K------SCRYNST---------AQSNG
I---D-IS----------------ST--G-YAFNLQ--NCGV--S---------------
-------------SSTAAA-QAMMAPA-QFLPHPA-------TD--LASSLSP-------
----------------------------------------CSQ---L-------------
-----------------------GY---RQLDPI----------------P-DVPR----
------------------------------------------------------------
-------------------------------Y-PW-M------------TIAGW------
-------TEHSLHAG-----------YRS------------------LRSPN--------
-----------------GCPRRR-------------------------------------
------------------------------------------------------------
-----------------------------GRQTYTRFQTLELEKEFHFNHYLTRRRRIEI
AHALCLTERQIKIWFQNRRMKLKKE------------LR---------------------
---------------------------------AVKEINEQA------------------
------------------------------------------------------------
------------------------------------------------------------
------------------------------------------------------------
---------------------RLEA-----------------------------------
------------------------------------------------------------
------------------------------------------KL----KD----------
----------QDDGKRKN-SSATGNADK-----------KDSSSIG---KDQHV------
-----------------------------------------------------DKIKHD-
VDG----DSRGRRESIQDEDNDSRNSTN--TDISTT---SVGDIVDTSP----------G
V----------------------------------------------DRLVARPLI----
----------------PSSDEASLP-----------------------------------
------------------------------------------------------------
------------------------------------------------------------
-------------------------------------------------------
>lcl|Query_10061
------------------------------------------------------------
--------------------------------------------MMNSYFEQ-SGFYN--
-GPVATTT-----------------AEQ--QSYR-FPQSLLVPPYGAQSGPRAAHEA---
-------------------------------------------TTTPYADPN--------
-------TNGA----------------AACK----------------IYSD-------T-
TV-FK------------AECLA---KEAN-GFSQAVKD----------------------
--------MV-NW-----------------------------------------------
SAR----AAN---E--QMRT---------FA---------AE------------------
------------------------------------------------------------
--------------NQAAAP--RGDA--------W-------QQ-CCQT-----------
------------------------------------------------------------
-------------------------------SPAV------------AQTPS-NAF----
------------------------------------------------------------
-------------------------------Y-PW-------------M-----------
----AIA------------G----------------------------------ANGV-R
------------------------------------------------------------
------------------------------------------------------------
---------------------------RRGRQTYTRYQTLELEKEFHTNHYLTRRRRIEM
AHSLCLTERQIKIWFQNRRMKLKKE------------AQ---------------------
---------------------------------AIKELNEQER--------QAQAAKTA-
------------------------------------------------------------
------------------------------------------------------------
------------------------------------------------------------
--------------------AVQA------------------------------------
------------------------------------------------------------
-----------------------------------------INS----N-SN-S-----N
TTPTK------DGSTSLSA-TKT-------------------------------------
------------------------------------------------------------
------------------------------------------------------------
------------------------------------------------------------
------------------------------------------------------------
------------------------------------------------------------
------------------------------------------------------------
-------------------------------------------------------
>lcl|Query_10062
------------------------------------------------------------
---------------------------------------------MNSYFEQ-SGFYN--
-GQSAA-----------------------EQSYR-FPQGLLVPPYPPQAGAPRSTEGAAA
GAASAYA----------------------------------AVDATNGGGGG-G-GSTAA
AA---------------------------CK----------------LYSNSVSEG-GS-
AI-FK------------PECLA---KDQN-GFNQAVKE----------------------
--------MASSWPS-GSVAGLRP------------------------------------
SG-----MAG---E--SMRP---------FP--------A-E------------------
------------------------------------------------------------
--------------NSATPR--VTDA--------W-------ST-CCQS-----------
------------------------------------------------------------
-------------------------------TPP------------MAQAPA-NAF----
------------------------------------------------------------
-------------------------------Y-PW-------------M-----------
----AIA------------G----WC----------------------------ANGL-R
------------------------------------------------------------
------------------------------------------------------------
---------------------------RRGRQTYTRYQTLELEKEFHTNHYLTRRRRIEM
AHALCLTERQIKIWFQNRRMKLKKE------------IQ---------------------
---------------------------------AIKELNEQER--------QAQAAKLA-
------------------------------------------------------------
------------------------------------------------------------
------------------------------------------------------------
--------------------AH--------------------------------------
------------------------------------------------------------
-------------------------------------------Q----KS---------S
TTSGGNNANNNDSTASATK-T---------------------------------------
------------------------------------------------------------
------------------------------------------------------------
------------------------------------------------------------
------------------------------------------------------------
------------------------------------------------------------
------------------------------------------------------------
-------------------------------------------------------
>lcl|Query_10063
------------------------------------------------------------
------------------------------------------------------------
------------------------------------------------------------
------------------------------------------------------------
------------------------------------------------------------
------------------------------------------------------------
------------------------------------------------------------
------------------------------------------------------------
------------------------------------------------------------
------------------------------------------------------------
------------------------------------------------------------
------------------------------------------------------------
------------------------------------------------------------
------------------------------MN-SM-LM----------------------
-------MFNF-----------------FTV-----------------------------
-------A----------------------------------------------------
----------ANGN-F-P--------------------------GVEP------------
---------------------------KRQRTAYTRHQILELEKEFHFNRYLTRRRRIEI
AHALCLSERQIKIWFQNRRMKWKKD-NKLPNT-KNVKKKNPN------------------
---------------------------------NANNANNNNN-T--NTTNNSNANNT--
--TNNNN-----------------------------------------------------
------------------------------------------------------------
-------------------------------------------PD-----QQNAN---RI
S------------NPQSQPPSLQSV----------------------VAPPQS-------
--SHHMVG-----------------------------------------PSPHSQ-----
-PNS-----------------------------------LVVD-----------------
-------------------TKTDYGLTEL-------------------------------
------------------------------------------------------------
------------------------------------------------------------
------------------------------------------------------------
------------------------------------------------------------
------------------------------------------------------------
------------------------------------------------------------
-------------------------------------------------------
>lcl|Query_10064
------------------------------------------------------------
------------------------------------------------------------
------------------------------------------------------------
------------------------------------------------------------
------------------------------------------------------------
------------------------------------------------------------
--------------------------MS------STMTSYYNTPGPYLTDMRNGSSDPS-
-----QHYNP--PSIQN----------GDS-----CDQ--RQYM-Q--PQYA-S-SPVQG
A-TYPRFPPFDRFEIRPINAHSDDSQSPPGHYY-TQCSES----QNNL----PQPAHQAQ
Q-PQQ------------LSHPNAYVPQ-DGV------QPNCRGSP-------VE-NQNMV
PQQFP-SCKMQQQ-----N------PPAMMQDHNGGVHRPVNP-DCAG------NNI--H
PQH---------CQSP--VH-SP-----QQ-MYPP---------NHVPQQPP----T-QN
--VNPVQSPSGGGGPSP------------LY-----------------------------
---------------------------------PW-MRSQ--------------------
------------------------------------------------------------
------------------------------------------------------------
---------------------------------------------FER------------
---------------------------KRGRQTYTRYQTLELEKEFHFNRYLTRRRRIEI
AHALCLTERQIKIWFQNRRMKWKKE-NKAKEPGAGFIMGT----ELVHH-LDRPPMTSV-
------------------------------------------------------------
------------------------------------------------------------
------------------------------------------------------------
------------------------------------------------------------
------------------------------------------------------------
------------------------------------------------------------
------------------------------------------------------------
------------------------------------------------------------
------------------------------------------------------------
------------------------------------------------------------
------------------------------------------------------------
------------------------------------------------------------
------------------------------------------------------------
------------------------------------------------------------
-------------------------------------------------------
>lcl|Query_10065
------------------------------------------------------------
------------------------------------------------------------
------------------------------------------------------------
------------------------------------------------------------
------------------------------------------------------------
------------------------------------------------------------
------------------------------------------------------------
------------------------------------------------------------
-----------------------------------------------------------M
PFETSL-SPYANHNR------YFSAVS-PALVSKD-------YA---------SV--EAN
-HPLS-SDDVCDDSK------------------TVLDPDDNS----N-----TDDDIKLP
EEQ----QK--------------FL--ILSRS----FY-PEEN--------CPNQI----
------------------------------------------------------------
-------------------------------P-VT-ASYTGYN---PTRLYSSY---PAR
IQELSVSPFPSGVGD--VPRPGKSPDFGTTNFGTFSEDKPKN-DCDDQEHKMFNQDEETC
DPYMQKPIYPWMVDSRHNTKSRQ-QQ-MYDRSKEHLSPFLG-------------------
------------------------------------------------------------
-----------------------EQPAKRARTAYTSAQLVELEKEFHFNRYLCRPRRIEM
ANLLNLSERQIKIWFQNRRMKFKKE------------QKSKG------------------
---------------------------------LYIQQSEKDL--------SSPVGSMA-
------------------------------------------------------------
------------------------------------------------------------
------------------------------------------------------------
--------------------GSSPL-----------------------------------
------------------------------------------------------------
---AS-----------------------------------SPTS----PTITSS--CSLT
SGGAPSISTE---SS-AQS-AMTYGRQTSSTACSGISSYTVR---------AHSDSLSSS
--------PNKLSTSNPSTYPSPNGNKYFSSSNTSRNVQ-YQNTYSDPTLQSHRH---DF
PFA---QNES-----DKKR-LSSPSASSTPSHCVST------PPSPVSPFQLNIQQPLFS
ESQSNVPFASDSDSNAKNSPYYYNPS--SRIMVPSHANWDQ---HMSFQNNLSSSM--GL
LCTAVDYTTPNNVRSI---VNNTAYPPPLNHGSYYYHH-QQMMNNGQMAHEWLMSSQESS
KPPKYP-SNASPKLADL-------------------------------------------
------------------------------------------------------------
-------------------------------------------------------
>lcl|Query_10066
------------------------------------------------------------
------------------------------------------------------------
-----------------------------------------------MMN---GSLY-EE
TSN-SRS----------------------------------SVEVVQP----AV-S-S--
------GPLHI----------------PAKR----------------V--SS---LAVTP
AYGHP-------------ECG--V--DG--------------------------------
---------AGSVIR-HPH-Q---TQPWG-------------------------------
TSP----YDN---H--SA-----------FEGH--------QYNH----------Q-S--
------------------------AM-TPGYYYNDR------------------------
DRKPP--IKFWSNS-YDLSS--AGP---S-TVATT-------DT-C-QT-FQPQS--WCN
YAPYS--GR----HM------------------EAHHHAAPQS---V-----AYLS--ED
--RTRAPID--------------G---FTHSDG--YTL---RT--FAP-AET-HPQ----
------------------------------------------------------------
-------------------------------P-TY-V-----------PAGTV-------
-------------------------------------------SETVVTNPLEWTGNVTV
------------------------------------------------------------
------------------------------------------------------------
---------------------------RKKRKPYSKFQTLELEKEFLFNAYVSKQKRWEL
ARNLNLTERQVKIWFQNRRMKSKKN------------SQ---------------------
----------------------------------RNAENNQNN--------NNTVVNAN-
------------------------------------------------------------
------------------------------------------------------------
------------------------------------------------------------
--------------------GQTIA-----------------------------------
------------------------------------------------------------
---QS--------------------------------------V----K-----------
------------------------------------------------------------
------------------------------------------------------------
------------------------------------------------------------
------------------------------------------------------------
------------------------------------------------------------
------------------------------------------------------------
------------------------------------------------------------
-------------------------------------------------------
>lcl|Query_10067
------------------------------------------------------------
-MNSNVVYASVCRNGGDATAYGPT---QPQQPLYNG---GATAAAQATSD-SITAYYH--
-HQQTPERL-------IQPAGPSYL--------PTT----LMTPYSTATELRTPPLHPEA
TNGHP---HQ--IISESN-GLSYTNL-DQSHF----------------------------
------------------------------------------------------------
-------------------------HQQQ--HH----N----------------------
--------RVGHT--SNPAPAYHHHHHSY-------------------------------
-SD----VAP---R--NP---------------------AYHHPY-------------RN
L---D-YS----------------YD-IGTHQAPDH--PQGV------------------
-------PLGPEGARV-VTGFGV-PPS-TY-PYLD-------SL---SLSRRNGY--AA-
YENYD-----------------------------PALRESCQM-----------------
---------------------NGGY--QYGS-PVHRTR--VPT---AQPTP--VPT----
------------------------------------------------------------
-------------------------------Y-KW-M------------QVKRS------
-------VPKP-PAK---P------DY-------------------NGYNSA------TT
N---------------SSDPN---------------------------------------
------------------------------------------------------------
------------------------GGPGTGRTNFTTKQLTELEKEFHFNKYLTRARRIEI
ATALNLNETQVKIWFQNRRMKQKKR------------MK---------------------
---------------------------------E--GI-IPA------------------
------------------------------------------------------------
------------------------------------------------------------
------------------------------------------------------------
---------------------DLSS-----------------------------------
------------------------------------------------------------
------------------------------------------SG----GE----------
---------------------------T-----------GSSSP----------------
------------------------------------------------------------
--------------SVTASVSVSSSNSVP-----------SAPVVTSGP-----------
-----------------------------------------------LTSPDNSQ-----
------------------------------------------------------------
------------------------------------------------------------
------------------------------------------------------------
-------------------------------------------------------
>lcl|Query_10068
------------------------------------------------------------
---------------------------------------------MTSSS----------
------------------------------------------------------------
-----------------------------------------------------------S
YN----TVAGN----------------FANG----------------LEHDPQLYFHGT-
KYS-E------------Y----DSCTHQ---YTSPYQ-----------------------
-----------RYLQP------Y----QA------------------------------V
RFD----VPC---N--LTPP---------QPDK------TPPYDLC---------C-S--
G---T--P----------------RY--GNVAHNTALTHHA-----------------YD
-INNCS-QNFYNHQS-GSGI--YRS----DMCSTD-------AA-IDSRDYES----CKI
ETP-S-Y--TPPSTN------------------QYE----AVP---P-----SATP---E
STRA---VE--------------SS--VLNSPPV--TA---QT--QNPQISKP--L----
------------------------------------------------------------
-------------------------------Y-PW-M-----------KSHGD-------
------------------------------------------------------T-NPGP
------------------------------------------------------------
------------------------------------------------------------
---------------------------KRSRQTYTRYQTLELEKEFHFNQYLTRRRRIEI
AHTLGLTERQIKIWFQNRRMKAKKE------------NK---------------------
----------------------------------FPISSSNSL-----------------
------------------------------------------------------------
------------------------------------------------------------
------------------------------------------------------------
------------------------------------------------------------
------------------------------------------------------------
------------------------------------------------------------
------------------------------------------------------------
----ASPNNHLSNQNSNSSD--------------------IPDVLQTKDGAMHFNHHQSQ
------------------------HQVPSKDSLL-THYQRETLIT---------------
------------------------------------------------------------
------------------------------------------------------------
------------------------------------------------------------
------------------------------------------------------------
-------------------------------------------------------
>lcl|Query_10069
------------------------------------------------------------
------------------------------------------------------------
------------------------------------------------------------
------------------------------------------------------------
----------------------------------MLSGSSRRRAVGGRPSRDMLMLSDGR
SQRSVKRQPQRKIISIQFIQKL--------------------------------------
------------MIMSSFLMNPQQY--------------V-DPKFPPSEEYSQGNYIQ--
--D---YYGP---HH------------------------QQHYA---------------G
F---HAYA---------AA--ENGTY-A------NTPPHHG-----------YYNPCSLG
QG------------GCL-------P-P---VDHVA-------TEDSLHHPPH--------
--------RSSPD----------------SSPPPAG----------SML----PRSADTQ
-----------------------------GSDCSGSE-----------------P-----
------------------------------------------------------------
----------------------------PVIY-PW-MK----------------------
-------KVH-N---------N--------P-----------------------------
------------------------------------------------------------
----------VNGN-F-P--------------------------GIEP------------
---------------------------KRQRTAYTRHQILELEKEFHFNRYLTRRRRIEI
AHALCLSERQIKIWFQNRRMKWKKD-NKLPNT-KNVKKKQPP------------------
----------------------------------------ANN-T------TSTNSNS--
--TSNA------------------------------------------------------
------------------------------------------------------------
------------------------------------------------------------
------------------RPQQPQQ----------------------QPPMVS-------
--LQAGGL-----------------------------------------HTPHMQ-----
-PCT------------------------------------PIE-----------------
-------------------PKDEYGLTEL-------------------------------
------------------------------------------------------------
------------------------------------------------------------
------------------------------------------------------------
------------------------------------------------------------
------------------------------------------------------------
------------------------------------------------------------
-------------------------------------------------------
>lcl|Query_10070
------------------------------------------------------------
------------------------------------------------------------
------------------------------------------------------------
------------------------------------------------------------
------------------------------------------------------------
------------------------------------------------------------
------------------------------------------------------------
------------------------------------------------------------
------------------------------------------------------------
------------------------------------------------------------
------------------------------------------------------------
------------------------------MEV---TCESGFINSQPSMAEFMTAL----
PHINETFHR--VSSINALQ-----SSVQ---PPPSLCQLEVAPQQGSTL---HGPV-T--
--TSPSPPSKQHPGS---GPGLN-SSV--AEY-PW-MKEKK----------TSR------
-------KQHQGLRGP--------------------------------------------
--------------------NLK--------MDSKLSPRTS------------MHSPVFD
HDICGTKENNENGM---------------------------------P------------
---------------------------RRLRTAYTNTQLLELEKEFHFNKYLCRPRRIEI
AASLDLTERQVKVWFQNRRMKHKRQ-SMMTK---NGDEK----GELEGGERPTSS-TPTG
GGSTL--------SGNEADTNKTDSADDRSATETSSSVGSPER-PPRGVKKQREMSSDRN
V-AERSPSTTATAA---DGLNEPLSPCSS-ERLLN---LDSD--FSQQQPNRIHSPGSVP
INN-ENLTGVSRKGSPTAA--------ELKSPEHSLSSSPP----T----EPIMHNLNSV
T-SDRSQSMVNSDTKSARSVCSGMTNGH---LNTTTGRNS--RKLPQS------CPMDT-
NIPFCNSPC-N-INCS-PAASNSHC--TSPGSVYQ-----MNSQHCPPNHISPSSSYHRT
--RSYSSTVPYSTD---PN-ALMAYSQNNHRGLSPSVGQSNY---CY-RTPPSTPNQQQS
YQHPSPQRMDNDWISQ---QSSYG-SQVQSPLYYTN---DRS--------------CPPQ
HNS---------MPHSQTQSQMGSAVSMGSHTVHS----APQRSSA-----HHPPV-SRS
P----YPYSVDSIPPPSQ------QH--DSHTHNAYMHDY--RG-DMNSGYSSNRSYSGA
HSNNGYDS-SVGSAGEQYV-PNSINPDG----SVSYCY---P-HHNN--ANSG-YRSDAY
DDNGS-QTIYYDLS-----N---STG--SNNRVPDYS--ATAPKQNFPQTGN---LYEVS
HTVGDTANIP-TY---NQNSENYRGQC----SGEGDISFNY--YDSSDSYSS--------
---------NNNN---GAATNNSCGTTDFNFL-TLASEFSS-PEYYQLS-----------
------------------------------------------------------------
-------------------------------------------------------
>lcl|Query_10071
------------------------------------------------------------
------------------------------------------------------------
------------------------------------------------------------
--------MSSN-FMEGVLGSKF-------------PSD--PTS----------------
----------------------------TYG----------------HS------QH---
----------------------RMYPYVSLSPQNSMSV----------------------
--------TGNLYYTSN-------------------------------------------
A-D----FA-----------------------K------SCRYNSG---------QS-NG
L---E-AP--------------------G-YSFGLQ--N---------------------
-------------TGPGAT-PTMMTPS-QFFSHPA-------ST-DLGSSITS-------
----------------------------------------CNQ---L-------------
-----------------------GI---RQLDPI----------------P-DVPR----
------------------------------------------------------------
-------------------------------Y-PW-M------------SIAA-------
-----------------------L----N------------------FAGPN--------
-----------------GCPRRR-------------------------------------
------------------------------------------------------------
-----------------------------GRQTYTRFQTLELEKEFHFNHYLTRRRRIEI
AHALCLTERQIKIWFQNRRMKLKKE------------MR---------------------
---------------------------------AVKEINEQA------------------
------------------------------------------------------------
------------------------------------------------------------
------------------------------------------------------------
---------------------RMES-----------------------------------
------------------------------------------------------------
-------------------------------------------K----VK----------
----------E------E----DK--DK-----------D-NK-----------------
------------------------------------------------------------
------------------ER---------KT---------DI---INSP----------T
S----------------------------------------------IILEDKIRN----
----------------P------KP-----------------------------------
------------------------------------------------------------
------------------------------------------------------------
-------------------------------------------------------
>lcl|Query_10072
------------------------------------------------------------
------------------------------------------------------------
------------------------------------------------------------
----------------------------------------------------MS-----S
YQFVNSLT-S-------------------CY----------SQGRQDPTAQDYYTPPVQ-
AYG---------------TCFN--------GPAS--PV-------------QP-------
---QQQ-YAGPYAQ---HLGTQ-----------NG-----------DPHHYSSCS-----
-------------------------------------------------------QQQRL
-----------------------GHS------INSQSPRTPTP-----SVT-PVPSCKY-
----------AESSTVHAAS-----------PQDL-----STTSSSSQP-PES-------
-----------PD-------------PG-HSPTP-TSK--SST-SRHL------------
-----SPDSSPQE--------PSPQ---QSPSPQQ------------QSGAQQPQ-----
--------------KGNAAFQGNPPQ----------------------------------
------------------------------IY-PW-MR----------------------
-------KVHVGQN----------------------------------------------
------------G-----------------------------------------------
----------VNSM-------------------------------GET------------
---------------------------KRQRTSYTRYQTLELEKEFHFNRYLTRRRRIEI
AHALCLSERQIKIWFQNRRMKWKKE-----------------------------------
------------------------------------------H----------KMASP--
IPSQI-------------------------------------------------------
------------------------------------------------------------
-------------------------------------------PQVI--PDHLPH-----
---------------------HMHG----------------------ETKA---------
------------------------------------------------------------
------------------------------------------------------------
------------------------------------------------------------
------------------------------------------------------------
------------------------------------------------------------
------------------------------------------------------------
------------------------------------------------------------
------------------------------------------------------------
------------------------------------------------------------
-------------------------------------------------------
>lcl|Query_10073
------------------------------------------------------------
------------------------------------------------------------
------------------------------------------------------------
------------------------------------------------------------
------------------------------------------------------------
------------------------------------------------------------
------------------------------------------------------------
------------------------------------------------------------
------------------------------------------------------------
------------------------------------------------------------
------------------------------------------------------------
------------------------------------------------------------
------------------------------------------------------------
------------------------------------------------------------
-----------------------------------------------------------R
------------------------------------------------------------
------------------------------------------------------------
---------------------------RRGRQTYTRYQTLELEKEFHTNHYLTRRRRIEM
AHSLCLTERQIKIWFQNRRMKLKKE------------AQ---------------------
---------------------------------AIKELNEQER--------QAQAAKAV-
------------------------------------------------------------
------------------------------------------------------------
------------------------------------------------------------
--------------------ASQS------------------------------------
------------------------------------------------------------
-----------------------------------------LNS----N----S-----N
SSNNTSPTK--DGSTPLTA-T-------KT------------------------------
------------------------------------------------------------
------------------------------------------------------------
------------------------------------------------------------
------------------------------------------------------------
------------------------------------------------------------
------------------------------------------------------------
-------------------------------------------------------
>lcl|Query_10074
------------------------------------------------------------
------------------------------------------------------------
------------------------------------------------MNGSTG--Y-ED
STT-RNG----------------------------------SDAA-------GA-TL---
Q------PLHI----------------PAKR----------------PTPTD---LAVT-
-YA--------------AECGD-----------P--------------------------
-----------SVIR-HGG-H--NSQTG--------WG---------------------Q
SYT----PDT---H--SAFV---------D--H------VPPYNH----------QQLCN
V---R--D----------------GV--TGYYY----ERK------------------PP
QTSS---IKFWSNS-YD-----AGPST-V-TPVPA-------DA-C-QS-FGSQT--WCN
YPPYP-GTRVH---M------------------EP--HT-PQP---V-----AYF--TDD
RPRVSGPMD--------------TV--YQQTDA--YGL---RS--FPT--DV-HCP----
------------------------------------------------------------
-------------------------------T-TY-V-----------QTTSG-------
------------------------------------------SEAMTTTNPLEWTGNVTV
------------------------------------------------------------
------------------------------------------------------------
---------------------------RKKRKPYSKFQTLELEKEFLFNAYVSKQKRWEL
ARNLNLTERQVKIWFQNRRMKSKKT------------SQ---------------------
----------------------------------RNAENNQNN--------TNTANNGS-
------------------------------------------------------------
------------------------------------------------------------
------------------------------------------------------------
--------------------NSQQH-----------------------------------
------------------------------------------------------------
---NV-----------------------------------AAKL----SA----------
------------------------------------------------------------
------------------------------------------------------------
------------------------------------------------------------
------------------------------------------------------------
------------------------------------------------------------
------------------------------------------------------------
------------------------------------------------------------
-------------------------------------------------------
>lcl|Query_10075
------------------------------------------------------------
------------------------------------------------------------
------------------------------------------------------------
----------------------------------------------------MS-----S
YQFVNSLT-S-------------------CY----------GQRSQDSSSQDYYTPQVQ-
SYG---------------GCYS--------GPGS--PV-------------QP-------
---YGP-YPQHSVP---HL--Q-----------NG-----------DHH-FNSCS-----
-------------------------------------------------------QT-RL
-----------------------N--------NPSQSPRTPTP-----SVT-PVPSCKY-
----------A-EPS--AAS-----------PQDL-----STSGGHQP--GSP-------
-----------AE-------------SR-TSPQPTRQQ--T----SPT----QQSST--Q
QSSGPQQTSPQQT--------SQGP---QESA--------SPQAGQ-----QQ-------
---------------KTPYP-NNPPQ----------------------------------
------------------------------IY-PW-MR----------------------
-------KVHVGQN----------------------------------------------
------------G-----------------------------------------------
----------VNAM-------------------------------GET------------
---------------------------KRQRTSYTRYQTLELEKEFHFNRYLTRRRRIEI
AHALCLSERQIKIWFQNRRMKWKKE-----------------------------------
------------------------------------------H----------KLAST--
MPPQI-------------------------------------------------------
------------------------------------------------------------
-------------------------------------------PQVM--ADHHPHHH---
--------------PHHHHAHHLHV----------------------LHRVASYQQQWSQ
NNYYCISP-----------------------------------------SSDGAV-----
------------------------------------------------------------
------------------------------------------------------------
------------------------------------------------------------
------------------------------------------------------------
------------------------------------------------------------
------------------------------------------------------------
------------------------------------------------------------
------------------------------------------------------------
-------------------------------------------------------
>lcl|Query_10076
------------------------------------------------------------
------------------------------------------------------------
------------------------------------------------------------
------------------------------------------------------------
------------------------------------------------------------
------------------------------------------------------------
------------------------------------------------------------
------------------------------------------------------------
------------------------------------------------------------
------------------------------------------------------------
------------------------------------------------------------
----------------------------------SPPI---SA--QTQNSQTTKPL----
------------------------------------------------------------
-------------------------------Y-PW-------------------------
------------------MKTHGDATPGP-------------------------------
------------------------------------------------------------
------------------------------------------------------------
---------------------------KRSRQTYTRYQTLELEKEFHFNQYLTRRRRIEI
AHTLGLTERQIKIWFQNRRMKAKKE------------NK---------------------
---------------------------------FPIPAMNPLA--------SPNSLINN-
------------------------------------------------------------
------------------------------------------------------------
------------------------------------------------------------
--------------------QNSNS-----------------------------------
------------------------------------------------------------
---SD-----------------------------------VPDI----LQTK--------
---DAIMRYSTHNSLHQVPTKDTVLLMHHQ------------------------------
------------------------------------------------------------
------------------------------------------------------------
------------------------------------------------------------
------------------------------------------------------------
------------------------------------------------------------
------------------------------------------------------------
-------------------------------------------------------
>lcl|Query_10077
------------------------------------------------------------
------------------------------------------------------------
------------------------------------------------------------
------------------------------------------------------------
------------------------------------------------------------
------------------------------------------------------------
------------------------------------------------------------
------------------------------------------------------------
------------------------------------------------------------
------------------------------------------------------------
------------------------------------------------------------
------------------------------------------------------------
------------------------------------------------------------
------------------------------------------------M-----------
----IYE------------R----------------------------------ANGL-R
------------------------------------------------------------
------------------------------------------------------------
---------------------------RRGRQTYTRYQTLELEKEFHTNHYLTRRRRIEM
AHALCLTERQIKIWFQNRRMKLKKE------------IQ---------------------
---------------------------------AIKELNEQER--------QAQAAKLA-
------------------------------------------------------------
------------------------------------------------------------
------------------------------------------------------------
--------------------LHQK------------------------------------
------------------------------------------------------------
-----------------------------------------SST----T----S-----G
GN----NAN--NNDSTTSA-T-------KT------------------------------
------------------------------------------------------------
------------------------------------------------------------
------------------------------------------------------------
------------------------------------------------------------
------------------------------------------------------------
------------------------------------------------------------
-------------------------------------------------------
>lcl|Query_10078
------------------------------------------------------------
------------------------------------------------------------
------------------------------------------------------------
--------MSSNTFMDSFLGSKY-------------ASDA--VS----------------
------SAAAL----------------QGYG----------------HHP-----QH---
----------------------RMYPYGSLSPQSSVAV----------------------
--------SGTLYYTSN-------------------------------------------
S-D----LA-----------------------K------SCRFNST---------GQSNG
I---D-IS----------------ST--G-YAFNLQ--NCGV--S---------------
-------------SSTAAA-QAMMAPA-QFLPHPA-------TD--LASSLSP-------
----------------------------------------CSQ---L-------------
-----------------------GY---RQLDPI----------------P-DVPR----
------------------------------------------------------------
-------------------------------Y-PW-M------------TIAGW------
-------TEHSLHAG-----------YRS------------------LRSPN--------
-----------------GCPRRR-------------------------------------
------------------------------------------------------------
-----------------------------GRQTYTRFQTLELEKEFHFNHYLTRRRRIEI
AHALCLTERQIKIWFQNRRMKLKKE------------LR---------------------
---------------------------------AVKEINEQA------------------
------------------------------------------------------------
------------------------------------------------------------
------------------------------------------------------------
---------------------RLEA-----------------------------------
------------------------------------------------------------
------------------------------------------KL----KD----------
----------QDDGKRKNGNSATGSGDK-----------KDSSSSG---KD--A------
-----------------------------------------------------DKIKHD-
LDG----DSRGRRESLQDEDNDSRNSTN--TDISTT---SVGDIVDTSP----------G
V----------------------------------------------DRLVARPLI----
----------------PSSDEASLP-----------------------------------
------------------------------------------------------------
------------------------------------------------------------
-------------------------------------------------------
>lcl|Query_10079
------------------------------------------------------------
------------------------------------------------------------
-----------------------------------------------MMN---GSLY-EE
TSN-SRS----------------------------------SVEVVQP----AV-S-S--
------GPLHI----------------PAKR----------------I--SS---LAVTP
AYGHP-------------ECG--V--DG--------------------------------
---------AGGVIR-HPH-Q---TQPWG-------------------------------
TSP----YEN---H--SA-----------FEGH--------QYNH----------Q-T--
------------------------AM-TPGYYYNDR------------------------
DRKPP--IKFWSNS-YDLPS--AGP---S-TVATT-------DT-C-QT-FQPQS--WCN
YAPYS--GR----HM------------------EAHHHATSQS---V-----AYLS--ED
--RTRAPID--------------G---FTHSDG--YTL---RT--FAA-AET-HPQ----
------------------------------------------------------------
-------------------------------P-TY-V-----------PAGTV-------
-------------------------------------------AETVVTNPLEWTGNVTV
------------------------------------------------------------
------------------------------------------------------------
---------------------------RKKRKPYSKFQTLELEKEFLFNAYVSKQKRWEL
ARNLNLTERQVKIWFQNRRMKSKKN------------SQ---------------------
----------------------------------RNAENNQNN--------NNTVINAN-
------------------------------------------------------------
------------------------------------------------------------
------------------------------------------------------------
--------------------GQTIT-----------------------------------
------------------------------------------------------------
---QS--------------------------------------V----K-----------
------------------------------------------------------------
------------------------------------------------------------
------------------------------------------------------------
------------------------------------------------------------
------------------------------------------------------------
------------------------------------------------------------
------------------------------------------------------------
-------------------------------------------------------
>lcl|Query_10080
------------------------------------------------------------
------------------------------------------------------------
------------------------------------------------------------
------------------------------------------------------------
------------------------------------------------------------
------------------------------------------------------------
--------------------------MS----------SYYT--NSYMPDLRSPGGVEQ-
-------YNG--QPVHN-------QPNGDM-----CDQGQRQYI-Q--PQYA-S-SPVQG
A-TYPRFPPYDRLEIRPITS-SPNSPSPPNQYYGNPCNQAPPG--PPL----PQPAHQPP
Q-HPQ------------MNHPNAYVPQ-DG-------QTNCRGSPQHHDPQ---------
--QYP-SCKMQPQQVPHG---PPHPPQSMGHDPNGVVHG--------------PNAM--P
P-----------CQSP--AQQSP-----QQ-PPQQPPQQPPMYQNHGGPPP--NQQQVQQ
QQQQQVQPPQPGNMPSP------------LY-----------------------------
---------------------------------PW-MRSQ--------------------
------------------------------------------------------------
------------------------------------------------------------
---------------------------------------------FER------------
---------------------------KRGRQTYTRYQTLELEKEFHFNRYLTRRRRIEI
AHALCLTERQIKIWFQNRRMKWKKE-NKAKLE-AGLSIGPTPP-ELTHL-GEHPPQ----
------------------------------------------------------------
------------------------------------------------------------
------------------------------------------------------------
------------------------------------------------------------
------------------------------------------------------------
------------------------------------------------------------
------------------------------------------------------------
------------------------------------------------------------
------------------------------------------------------------
------------------------------------------------------------
------------------------------------------------------------
------------------------------------------------------------
------------------------------------------------------------
------------------------------------------------------------
-------------------------------------------------------
>lcl|Query_10081
------------------------------------------------------------
----------------------------MMMNSSNAMYAGGVC---SQQP----PVVN--
-YSAET--------------QIFYG--------DVGQQ-----HYGY-----PESQAAEP
PNSHLP--HQ--IINESN-GLSYTNL-DAGHPA---------------------------
------------------------------------------------------------
---------------------------YNHHRQ---------------------------
-----------HNH--QPYYPQTPGQFYR-------------------------------
-----------------------------------------TFEY---------------
----E-NN----------------HTEVPSYH-AAYH-----------------------
--------------NLDT-GISRRN-N-PY------------------SP----Y---ET
FDS-------------------------------QQPTTDCH------------------
----------------------------AMTAAAFRSQ----T---PQQQH---PT----
------------------------------------------------------------
-------------------------------Y-KW-M------------QVKRS------
-------LPKP-VPK---P------EF-------------------GYN-GT------ST
S---------------PGNGSYS-GV-ATASNTNGTN-----------------------
------------------------------------------------------------
-----------------------GGTNGSGRTNFTTKQLTELEKEFHYNKYLTRARRIEI
ATALQLNETQVKIWFQNRRMKQKKR------------MK---------------------
---------------------------------E--GL-LLT------------------
------------------------------------------------------------
------------------------------------------------------------
------------------------------------------------------------
---------------------DVSS-----------------------------------
------------------------------------------------------------
------------------------------------------AK----EN----------
---------------------------S-----------PTTCTTP--------------
------------------------------------------------------------
-------------------TLLHSPTGSS--------------NGATSP-----------
-----------------------------------------------LSSKDANQ-----
------------------------------------------------------------
------------------------------------------------------------
------------------------------------------------------------
-------------------------------------------------------
>lcl|Query_10082
------------------------------------------------------------
------------------------------------------------------------
------------------------------------------------------------
------------------------------------------------------------
------------------------------------------------------------
------------------------------------------------------------
--------------------------MS------STMTSYYS-PGPYLNDMRNGSNDPT-
-----QHYNP--PSIQN----------GDS-----CDQ--RQYM-Q--PQYA-S-SPAQG
A-TYPRFPPYDRLEIRPITAHSDDSQSPPGHYY-TQCSQS----QNNI----PQPAHQAQ
Q-QQQ------------LSHPNAYVPQ-DGV------QQNCRGSP-------VE-SQNMV
PQQFP-SCKMQQQ-----N------PQAMMQEHNG-VHRPVNP-DCAG------NNM--H
PQH---------CQSP--VH-SP-----QQ-MYPP---------NHVPQQPP----N-QN
--VNQVQPPSGG--PSP------------LY-----------------------------
---------------------------------PW-MRSQ--------------------
------------------------------------------------------------
------------------------------------------------------------
---------------------------------------------FER------------
---------------------------KRGRQTYTRYQTLELEKEFHFNRYLTRRRRIEI
AHALCLTERQIKIWFQNRRMKWKKE-NKAKLE-SGLIMGPGGP-ELVHH-LDRPPMTSV-
------------------------------------------------------------
------------------------------------------------------------
------------------------------------------------------------
------------------------------------------------------------
------------------------------------------------------------
------------------------------------------------------------
------------------------------------------------------------
------------------------------------------------------------
------------------------------------------------------------
------------------------------------------------------------
------------------------------------------------------------
------------------------------------------------------------
------------------------------------------------------------
------------------------------------------------------------
-------------------------------------------------------
>lcl|Query_10083
------------------------------------------------------------
-MNSNVVYASVCRNGGDATAYGSS---QPQQPLYNG---GATSTPATG-D-SITAYYH--
-HQPTQERL-------IQSAGPSYL--------PTT----LMTPYSSAPELRTPPLHPEA
TNGHPTP-HQ--IISDSN-GLSYTNL-DQSHF----------------------------
------------------------------------------------------------
-------------------------HQQQ--HH----N----------------------
--------RVGHP--SSPAQAYHHHHSYS-------------------------------
--D----VAP---R--NP---------------------AYHHAY-------------RN
L---E-YS----------------YD-MSTHQAPDH--PQGV------------------
-------PLGPEGARV-VTGFGV-PPS-PY-PYLD-------SL---SLSRRNGY--AAA
YENYD-----------------------------PALRESCQM-----------------
---------------------NGGY--QYGS-HVHRSR--VPT---AQPTP--VPT----
------------------------------------------------------------
-------------------------------Y-KW-M------------QVKRS------
-------VPKP-PPK---P------DY-------------------NGYNSS------TA
N---------------SNDPN---------------------------------------
------------------------------------------------------------
------------------------GGPGTGRTNFTTKQLTELEKEFHFNKYLTRARRIEI
ATALHLNETQVKIWFQNRRMKQKKR------------MK---------------------
---------------------------------E--GL-IPT------------------
------------------------------------------------------------
------------------------------------------------------------
------------------------------------------------------------
---------------------DPSN-----------------------------------
------------------------------------------------------------
------------------------------------------SG----GE----------
---------------------------T-----------GSSPP----------------
------------------------------------------------------------
--------------SVTGSVPVSSSNSVP-----------SASVVTGGP-----------
-----------------------------------------------LTSPDNSQ-----
------------------------------------------------------------
------------------------------------------------------------
------------------------------------------------------------
-------------------------------------------------------
>lcl|Query_10084
------------------------------------------------------------
------------------------------------------------------------
------------------------------------------------------------
------------------------------------------------------------
------------------------------------------------------------
------------------------------------------------------------
------------MIMSSFLMNPQQY--------------V-DPKFPPSEEYSQGNYMP--
--D---YYSQ---HH------------------------QQHYG---------------G
F---HAYA----------T--ENGTA-G----YANTSPH-G-----------YYNPCSLG
QN------------CIS--------------DHLT-------ADDSLHHQPHN-------
-------NRSSPD----------------SSPPPAGS----------LV----PRS-DTQ
-----------------------------GSDCSASE-----------------P-----
------------------------------------------------------------
----------------------------PVIY-PW-MK----------------------
-------KVHSNPDG------Q-----GRRF-----------------------------
-------G----------------------------------------------------
----------VNGS-F-P--------------------------GIEP------------
---------------------------KRQRTAYTRHQILELEKEFHFNRYLTRRRRIEI
AHALCLSERQIKIWFQ--------------------------------------------
------------------------------------------------------------
------------------------------------------------------------
------------------------------------------------------------
------------------------------------------------------------
------------------------------------------------------------
------------------------------------------------------------
------------------------------------------------------------
------------------------------------------------------------
------------------------------------------------------------
------------------------------------------------------------
------------------------------------------------------------
------------------------------------------------------------
------------------------------------------------------------
------------------------------------------------------------
-------------------------------------------------------
>lcl|Query_10085
------------------------------------------------------------
------------------------------------------------------------
------------------------------------------------------------
------------------------------------------------------------
------------------------------------------------------------
-----------------------MLSGSSRRRAVGGRL-SRDMLMLSDGRSQRSVKRQPQ
RKIISIQFIQKLMIMSSYLMNSP-Y---------------SDPKFPPTEEYSQGNYIPSH
G-G--DYYTPSHHHHHHPHHQQHPHHQHHAPPSHHQHPPPQHPPPPPHHHHPY---AGYP
I---SGPV-----GYTQ----ENGSP---VYGTPP--Q---HY---------YR--PPCG
MGP---VSPLPRTP-----VD---PTA-SLSPVP---------GPQPPQQPQ--------
---------RSPV----------------SSPT-------PPG--IL--------SRSQV
S-------------SQ----PQQQQ--LGGPTS---------PDCAVSGGNGANQ-----
------------------------------------------------------------
----------------------------PVIY-PW-MK----------------------
-------KVHVGSVA---------------------------------------------
------------------------------------------------------------
----------ANGN-FP---------------------------GVEP------------
---------------------------KRQRTAYTRHQILELEKEFHFNRYLTRRRRIEI
AHALCLSERQIKIWFQNRRMKWKKD-NKLPNT-KNVKKKNPN------------------
---------------------------------NANNSNNTNN-T---------NTTN--
--NNNANN----------------------------------------------------
------------------------------------------------------------
-------------------------------------------TS---------------
---------------NNNNPDQQNS----------------------NRISNPQS-----
-----Q--------------------------------------------PPSLQ-----
-PVVA-PPPPSH---HM-------------------VGRSPHSQ----PNSL--------
----------------VVDTKTDYGLTEL-------------------------------
------------------------------------------------------------
------------------------------------------------------------
------------------------------------------------------------
------------------------------------------------------------
------------------------------------------------------------
------------------------------------------------------------
-------------------------------------------------------
>lcl|Query_10086
------------------------------------------------------------
------------------------------------------------------------
------------------------------------------------------------
----------------------------------------------------MS-----S
YQFVNSLT-S-------------------CY----------SQGRQDPTAQDYYTPPVQ-
AYG---------------TCFN--------GPAS--PV-------------QP-------
---QQP-YAGPYAQ---HLGTQ-----------NG-----------DPHHYSSCS-----
-------------------------------------------------------QQQRL
-----------------------GHS------INSQSPRTPTP-----SVT-PVPSCKY-
----------AESSSVHAAS-----------PQDL-----STTSSSSQP-PES-------
-----------PD-------------PG-HSPTP-TSK--SST-SRHL------------
-----SPDSSPQE--------PSPQ---QSPSPQQ------------QSGGQTPQ-----
--------------KGNGAFQGNPPQ----------------------------------
------------------------------IY-PW-MR----------------------
-------KVHVGQN----------------------------------------------
------------G-----------------------------------------------
----------VNSM-------------------------------GET------------
---------------------------KRQRTSYTRYQTLELEKEFHFNRYLTRRRRIEI
AHALCLSERQIKIWFQNRRMKWKKE-----------------------------------
------------------------------------------H----------KMTST--
LPPQI-------------------------------------------------------
------------------------------------------------------------
-------------------------------------------PQVI--PDHLPH-----
---------------------HMHG----------------------ETKA---------
------------------------------------------------------------
------------------------------------------------------------
------------------------------------------------------------
------------------------------------------------------------
------------------------------------------------------------
------------------------------------------------------------
------------------------------------------------------------
------------------------------------------------------------
------------------------------------------------------------
-------------------------------------------------------
>lcl|Query_10087
------------------------------------------------------------
------------------------------------------------------------
------------------------------------------------------------
--------MTSN-FMEGVLGSKF-------------PSD--PTS----------------
----------------------------TYG----------------HS------QH---
----------------------RMYPYVSLSPQSSMSV----------------------
--------TGNLYYTSN-------------------------------------------
A-D----FA-----------------------K------SCRYNSA---------QS-NG
L---E-TP--------------------G-YSFGLQ--N---------------------
-------------TAPGAT-PTMMTPS-QFFSHPA-------ST-DLGSSITS-------
----------------------------------------CNQ---L-------------
-----------------------GI---RQLDPI----------------P-DVPR----
------------------------------------------------------------
-------------------------------Y-PW-M------------SIAA-------
-----------------------L----N------------------FAGPN--------
-----------------GCPRRR-------------------------------------
------------------------------------------------------------
-----------------------------GRQTYTRFQTLELEKEFHFNHYLTRRRRIEI
AHALCLTERQIKIWFQNRRMKLKKE------------MR---------------------
---------------------------------AVKEINEQA------------------
------------------------------------------------------------
------------------------------------------------------------
------------------------------------------------------------
---------------------RMES-----------------------------------
------------------------------------------------------------
-------------------------------------------K----VK----------
----------E------E----DK--DK-----------DINK-----------------
------------------------------------------------------------
------------------ER---------KT---------DI---INSP----------T
S----------------------------------------------IILDDKIRN----
----------------P------KP-----------------------------------
------------------------------------------------------------
------------------------------------------------------------
-------------------------------------------------------
>lcl|Query_10088
------------------------------------------------------------
------------------------------------------------------------
------------------------------------------------------------
------------------------------------------------------------
------------------------------------------------------------
------------------------------------------------------------
------------------------------------------------------------
------------------------------------------------------------
------------------------------------------------------------
------------------------------------------------------------
------------------------------------------------------------
------------------------------MEV---TCESGFINSQPSMAEFMTAL----
PHINETFHR--VSSINALQ-----SSVQ---PPPSLCQLEAPPQQGGTL---HGPV-A--
--TSPSPPSKQHPGT---GPGLN-SSV--AEY-PW-MKEKK----------TSR------
-------KQHQ-------------------------------------------------
------------------------------------------------------------
-------ENNENGM---------------------------------P------------
---------------------------RRLRTAYTNTQLLELEKEFHFNKYLCRPRRIEI
AASLDLTERQVKVWFQNRRMKHKRQ-SMMTK---NGDEK----SELERGETPTSS-TPTG
AGSTL--------SGNEADTNKTDSADDRSATETSSSVGSPER-PPRGVKKQREMSSDRN
V-ADRSPSATTAVT---DGLTEPLSPCSS-ERLLN---LDSE--FSQQPPNRIHSPGSAP
ISS-ENLTGVSRKGSPAAA--------ELKSPEHSLSSSPP----T----EPIIHNMNSV
A-PDRSQSLVNSDAKNARSVCSGMTNGH---LNTTTGRNS--RKLPQS------CPMDT-
TIPYCNSPC-N-INCS-PVANSGHC--ASPNSVYQ-----INTPHCPPNHVSPNSSYHRT
--RSYSSTVPYSAD---PN-GMMSYGQNNHRGLSPNVGQGNY---CY-RTPPSTPNQQQT
YQHPSPQRMDNDWISQ---QSSYG-SQVQSPLYYTS---ERS--------------CPPQ
HNS---------MPHNQTQSHLGSAVSMGSHPVHN----AQQRNSS-----HPPPV-SRS
P----YPYSVDSLPPQSQ------QH--DSHSHSAYMHDY--RG-DMNSSYTSNRNYSGI
HSNNGYDS-NLGSTGEQYV-PNSINPDG----SVSYCY---P-HHNN--TNSG-YRSDSY
DDNGS-QTIYYDLS-----N---STG--NNNRVPDYS--ATAPKQNFPQTSS---LYEVS
HTVADTANIP-TY---NQNTENYRGQC----SGEGDISFNY--YDSSDSYSS--------
---------NNNN---GTANNNTCGTSDFNFL-TLASEFSS-P-----------------
------------------------------------------------------------
-------------------------------------------------------
>lcl|Query_10089
------------------------------------------------------------
------------------------------------------------------------
------------------------------------------------------------
------------------------------------------------------------
------------------------------------------------------------
------------------------------------------------------------
------------------------------------------------------------
------------------------------------------------------------
------------------------------------------------------------
------------------------------------------------------------
------------------------------------------------------------
------------------------------MEA-A-AMESGFINSQPSMAEFMTAL----
PHINESFR--GASSINGAA---TVTPAP---P--------QSQQRGAVP--ESPPEQA--
--PKHAAAA--------NGYS-AGVAV--PEY-PW-MKEKK----------TTR------
-------KQQQ-------------------------------------------------
------------------------------------------------------------
-------ETTDNGM---------------------------------P------------
---------------------------RRLRTAYTNTQLLELEKEFHFNKYLCRPRRIEI
AASLDLTERQVKVWFQNRRMKHKRQ-TSVMK----DDDK----D---------------G
VDRSL-------DSGSDIATGGDSNEPDLDSDHGIPS-RTPEH-----SNTSKDLMN---
LDSDAGESCCA--P----------SP-AKPDTIAK------D--SDQPPVTPLKSPTTLS
TPV---ACPPMVSPPVVP--------LERRSTPNIQNDP------TPLTMEEQ-LTVNTI
S-IALSHSTVCDNLPSQTTI-SRTINSYKQ--NT-DLSPN---KINSLNSQ---HTVEM-
-----RPST-TSAVSS-ASTNAMYS--KSPSVPFPS----MPQENCANNHVSPSPNYKRP
--RMYSG--PYPPD---PG--IGAYTPSGPAATSPPNG-PTY---CY-R--NPTPNHHSQ
PIHNQP-VDSSSYSTSL-PQRPYKTQH-QNNMPYYP--GQANVQ-PSAASNQLPNTCHPH
Q-N-----DMYNVPPR-G-NQLPDQSMMPQQQQQPQQQHYPQRNTVQ---QQQH----QS
N----YAYNSDQSSTQYPVTDY---N--HSRGYDSYH-TQ--QDMSMNNDYM---QSGN-
-----------------HV-GANVVNNG-------YCY---P-SYRN--ESYS-DN-NMI
THQPDMHGMYYDMN-----S---VNT--EEPSNAYVS--PQP-KTNLSQDSG---YYELQ
NPVQEGAAIS-DYT---ESQERFNSQA----E-----DFNYNCFNETDCYTS--------
--------------------SNTCGTSDFNFL-NITNDYNT-PEYYQLS-----------
------------------------------------------------------------
-------------------------------------------------------
>lcl|Query_10090
------------------------------------------------------------
------------------------------------------------------------
------------------------------------------------------------
------------------------------------------------------------
------------------------------------------------------------
------------------------------------------------------------
------------------------------------------------------------
------------------------------------------------------------
-----------------------------------------------------------M
PFETSV-SPYANHNR------YYS-VS-PALVTKD-------YT---------SV--DAN
-HPLS-PDDVCENSK------------------NPLDADDDS----N-------EDIKLS
EEQ----QK--------------FL--ILPKN----FY-PEEN--------CSNQI----
------------------------------------------------------------
-------------------------------P-IT-SSYETYN---SGKLFNSY---PTR
IQEQTVSSFSSGTGD--CPLSGKNPEFGSLEFETFSEDKPKN-DCDEQERKMFTQDDDVS
DPYLQKPIYPWMVDSRHNTKTRQ-QHIMQDGNKDHLNSFLDGHLQYNAMGFQTYIRLCYG
NAALKDSKNFSEFS-----------------DGKFT------------------------
---------------------TCDQPTKRARTAYTSAQLVELEKEFHFNRYLCRPRRIEM
ANLLNLSERQIKIWFQNRRMKYKKE------------MKSKG------------------
---------------------------------VFIQQAEKDL--------SSPVGSMT-
------------------------------------------------------------
------------------------------------------------------------
------------------------------------------------------------
--------------------GSSPL-----------------------------------
------------------------------------------------------------
---TG-----------------------------------SPNS----PSIASS--CNMA
SSGSHSTVTD---SSPVQS-SMSYGRQTSSNNICSDLSYTIR---------ANSDPLLSS
--------PNKLSS--PSSFPCSNGNKYFSSSNAGRNIQ-FPNTYADSNMLSHRH---DL
PFA---QNDT-----DKKRVLSSPSASSTPSQCVST------PPSPVSPFQLNIQQSLFP
ESQTNVPLSLDGENSPKNSPFYYNSG--SRIMVPSHANWDQ---HMSFQNNLSSSM--GL
LCAAVDYTTPNNMRAL---VNNSAYPSQLHHGSYYYHH-QQMISNGQMAHDWLMSSQEAN
KPPKYE-STSSPKLADL-------------------------------------------
------------------------------------------------------------
-------------------------------------------------------
>lcl|Query_10091
------------------------------------------------------------
---------------------------------------------MTS------------
------------------------------------------------------------
------------------------------------------------------------
--------TTN----------------IYPS----------------VEYDQQFYMHGG-
KLTVN------------YP--CDNYYSQ---YAPAVPS----------------------
--------SY-KYATD------S----TY------------------------------A
RYD----NSC--------VP---------QT-K------TIPYEAF---------NPP--
A---V--N----------------GF--AVGSLNHPYPTNI-----------------YD
NYGHCN-QNFHGHVT-NSNS--YRG----DINVR------------ESPDFQSSS--CES
TSPVA-Y--SPPATG------------------HYE----STT---K-----SCQN---S
DSSG---FE--------------QG--LQQEDQT--VP---AK--PVVPSKTN--L----
------------------------------------------------------------
-------------------------------Y-PW-M-----------KSYTD-------
------------------------------------------------------T-NTGP
------------------------------------------------------------
------------------------------------------------------------
---------------------------KRTRQTYTRYQTLELEKEFHYNQYLTRRRRVEI
AHTLGLTERQIKIWFQNRRMKAKKD------------GK---------------------
----------------------------------FVSPVSHT------------------
------------------------------------------------------------
------------------------------------------------------------
------------------------------------------------------------
------------------------------------------------------------
------------------------------------------------------------
------------------------------------------------------------
------------------------------------------------------------
----ISLSSQLCNHNSNSSD--------------------TPELIQD-EMVQQVASTTIE
------------------------DIRLGKPSF---------------------------
------------------------------------------------------------
------------------------------------------------------------
------------------------------------------------------------
------------------------------------------------------------
-------------------------------------------------------
>lcl|Query_10092
------------------------------------------------------------
------------------------------------------------------------
------------------------------------------------------------
--------MSSNTFMDSFLNSKY-------------ASDA--VS----------------
------PAAAL----------------QGYS----------------H-------QH---
----------------------RMYPYGSLSPQSSVAV----------------------
--------SGTLYYTSN-------------------------------------------
AAD----LA-----------------------K------SCRYNST---------GAGNG
L---D-IS----------------GS--G-YAFNLQ--NCGV------------------
-----------------AGPGSMMTPA-QFLTHPA-------SD--LASTLSP-------
----------------------------------------CSQ---L-------------
-----------------------GY---RQLDPL----------------P-DVPR----
------------------------------------------------------------
-------------------------------Y-PW-M------------SIAGW------
-------TD-SLHAG-----------YRS------------------LRSPN--------
-----------------GCPRRR-------------------------------------
------------------------------------------------------------
-----------------------------GRQTYTRFQTLELEKEFHFNHYLTRRRRIEI
AHALCLTERQIKIWFQNRRMKLKKE------------LR---------------------
---------------------------------AVKEINEQA------------------
------------------------------------------------------------
------------------------------------------------------------
------------------------------------------------------------
---------------------RLEA-----------------------------------
------------------------------------------------------------
------------------------------------------KL----KD----------
----------QDSKDRKGTTSSCSTSEK-----------KESSSSKDL-----I------
-----------------------------------------------------DKSKRDG
LEG----LDLGPRRDGLRDDDDSNNSTN--TNVSTT---SVGDIVDHSP----------P
D----------------------------------------------VRMPARPLV----
----------------PSSDEASLP-----------------------------------
------------------------------------------------------------
------------------------------------------------------------
-------------------------------------------------------
>lcl|Query_10093
------------------------------------------------------------
------------------------------------------------------------
------------------------------------------------------------
------------------------------------------------------------
------------------------------------------------------------
------------------------------------------------------------
------------MTMSSFLMNSPAY--------------V-DPKFPPTEEYSQGNYIQ--
--D---YYAQ---AA------------------------PGHYGG-----------AFGG
V---NSEH---AVSYGQHA--VASTY-A--TNTNGSSP--Y-----------YQHSCSLG
QT------------SVP-------PLS-V-VDRVA-------TTHSPPPLLH--------
---------RSPV----------------SSPQPPGH-----------------LRQDSN
-----------------------------SSDCPGTD-----------------P-----
------------------------------------------------------------
----------------------------PVIY-PW-MK----------------------
-------KVHVS---------H--------------------------------------
------------------------------------------------------------
----------VNGT-F-P--------------------------GIEP------------
---------------------------KRQRTAYTRHQILELEKEFHFNRYLSRRRRIEI
AHSLCLSERQIKIWFQNRRMKWKKD-NKLPNT-KNVKKKQPQ------------------
---------------------------------NNVQTNNASK-N-------GNINNN--
--NNNNS-----------------------------------------------------
------------------------------------------------------------
------------------------------------------------------------
-----------------------QP----------------------QTPI---------
------GM-----------------------------------------QPQHRM-----
-SSL-----------------------------------SAVE-----------------
-------------------PKDEYGLTEL-------------------------------
------------------------------------------------------------
------------------------------------------------------------
------------------------------------------------------------
------------------------------------------------------------
------------------------------------------------------------
------------------------------------------------------------
-------------------------------------------------------
>lcl|Query_10094
------------------------------------------------------------
------------------------------------------------------------
------------------------------------------------------------
------------------------------------------------------------
------------------------------------------------------------
------------------------------------------------------------
----------------------------------------MGPVSPLSRTPSSMDPLP--
-----------------------------------------------------------G
S---HSPV--------------PGMP-G--------GPP------------------SLG
AQ------------QPP-------P----------------------STQPQR-------
----------SPV----------------SSPTPPGMACVQPP--SQQT----PNKLGGQ
----------------------------TSPDCAMSGNNASNNGNSGGGGAG-GQ-----
------------------------------------------------------------
----------------------------PVIY-PW-MK----------------------
-------KVHVGPG----------------------------------------------
-------A----------------------------------------------------
----------ANGS-F-P--------------------------GVEP------------
---------------------------KRQRTAYTRHQILELEKEFHFNRYLTRRRRIEI
AHALCLSERQIKIWFQNRRMKWKKD-NKLPNT-KNVKKKNPN------------------
---------------------------------NANSANNNGA-N----NNNNTTTNA--
--SNNNN-----------------------------------------------------
------------------------------------------------------------
-------------------------------------------PD-----QQNAN---RL
T------------N---SNPPQTMP----------------------LTPLGP-------
---QGHHL-----------------------------------------VAPPPR-----
-PNS-----------------------------------IVVD-----------------
-------------------TKNDYGLTEL-------------------------------
------------------------------------------------------------
------------------------------------------------------------
------------------------------------------------------------
------------------------------------------------------------
------------------------------------------------------------
------------------------------------------------------------
-------------------------------------------------------
>lcl|Query_10095
------------------------------------------------------------
------------------------------------------------------------
---------MNGNSL-----Y---EDPNRSSVDL------------------TNALA-VT
TTT-SLL----------------------------------PPST----------TPGVQ
Q------PLHI----------------PAKR----------------LTPNS---LPVS-
-YVPS------------NECSS-----------S--SV----------------------
--------DPSTAIR-HNG------QTWTS------ST---------------------P
AYS----PEN---H--SAF----------DA-Q------VPQYNH---------------
------------------------GI-SPGYYYS---ERK------------------TP
SSSTP--IKFWSNT-YEVPN--AGPST-T---IPA-------DA-CHQS-FAPQT--WCN
YSPYP--SRVHPSAV------------------EP--HV-PQA---V-----SYFP-TED
RSRLCTSMD--------------GV--YTQSDTTTYSL---RN--FPA--EV-HCP----
------------------------------------------------------------
-------------------------------S-TY-V-----------QQATV-------
------------------------------------------GEPMTTTNPLEWTGTVTI
------------------------------------------------------------
------------------------------------------------------------
---------------------------RKKRKPYSKFQTLELEKEFLFNAYVSKQKRWEL
ARNLNLTERQVKIWFQNRRMKSKKT------------SQ---------------------
----------------------------------RNTENNQNN--------TNTSGGTA-
------------------------------------------------------------
------------------------------------------------------------
------------------------------------------------------------
--------------------SGN-------------------------------------
------------------------------------------------------------
-----------------------------------------SKI----PV----------
------------------------------------------------------------
------------------------------------------------------------
------------------------------------------------------------
------------------------------------------------------------
------------------------------------------------------------
------------------------------------------------------------
------------------------------------------------------------
-------------------------------------------------------
>lcl|Query_10096
------------------------------------------------------------
------------------------------------------------------------
------------------------------------------------------------
------------------------------------------------------------
------------------------------------------------------------
------------------------------------------------------------
------------------------------------------------------------
------------------------------------------------------------
-----------------------------------------------------------M
PYENSY-SPYENNKDG-----FLDSAP-PPPPPPS-------SS-VT--VVVGEE--NST
VSALS-TDIIH--SL------------------KIEPASDGTK---N-----FAESCSGA
EDKSPVFNK--------------FL--LYSSTPSECYA-AAPT---TIASDAQNFY----
------------------------------------------------------------
-------------------------------P-VT---DDCVN---PSKCGNFN---NWR
ITEQSNLPANCAPECG----GGGAISYSPSGLLVYPTDRKDVYNDPERKMPMFSGDDSTT
EMFVSKSIYPWMLDSRPN-KNRQ-----------QLNPQANIH-QENDTGEQ--------
-----HMENIG-------------------------------------------------
-----------------------EQPSKRARTAYTSIQLVELEKEFHFSKYLCRPRRIEL
ASLLHLSERQIKIWFQNRRMKLKKE------------QKSKG------------------
---------------------------------LYSQQFDKEL--------SSPCSSIT-
------------------------------------------------------------
------------------------------------------------------------
------------------------------------------------------------
--------------------GSSPL-----------------------------------
------------------------------------------------------------
---TP-----------------------------------SPMS----PTVSAT----VS
SGGTISITSEYHTSMSSHS-PSSFVLGNKKLSLSNLDHIDIGQEASVCGHSVSSHILASS
HQKTTGKKPTDSNV-FQSFAEPGRQSNYSLSHECGHGIL--SNPNTNGSSLGHRHQSHYE
PSVVSSQDDSTEEDSDRKPILTNVPLSESDSPVPSTSQYQI-----SSPIKSPHNICQNV
ENSFNHSYFMNLGGPYLSNPVYDHNVLGQRILVPNQGEWNQAAIPFPVPSNVQNTAV-GL
LCPAIDYSSANSRPNS------------VNNHTYYYHQ---LSPENQSSQNWCGPPQGSG
IVQKYG-SSSSPKLTHL-------------------------------------------
------------------------------------------------------------
-------------------------------------------------------
>lcl|Query_10097
------------------------------------------------------------
------------------------------------------------------------
------------------------------------------------------------
----------------------------------------------------MS-----S
YQFVNSLT-S-------------------CY----------GQGRPDATAPDYYTPPVQ-
AYG---------------NCYS--------GPAS--PV-------------PQQQQQQQQ
AHNYGH-YGQHLTH---HQ--------------NG---------D-QQQHFSSCS-----
-------------------------------------------------------QQQQQ
-----------------------PQPRLTLPITASQSPRTPTP-----SVT-PVPSCKY-
----------VEPPSV--AS-----------PQDL-----STTSSNSSQPAGS-------
-----------PD-------------PG-QSPPPRHLQ--PGG-KTTS--QGHGLSSS--
--GPLSPESSCDE--------PSPQ---SSPTSQHAVPNGPSTQTNTNSTSSNSG-----
--------------QKASNF-QNPPQ----------------------------------
------------------------------IY-PW-MR----------------------
-------KVHVGQN----------------------------------------------
------------G-----------------------------------------------
----------VNSM-------------------------------GEA------------
---------------------------KRQRTSYTRYQTLELEKEFHFNRYLTRRRRIEI
AHALCLSERQIKIWFQNRRMKWKKE-----------------------------------
------------------------------------------H----------KMAST--
IPPQI-------------------------------------------------------
------------------------------------------------------------
-------------------------------------------PQVM--AEHHAH-----
---------------------HLHG----------------------ETKA---------
------------------------------------------------------------
------------------------------------------------------------
------------------------------------------------------------
------------------------------------------------------------
------------------------------------------------------------
------------------------------------------------------------
------------------------------------------------------------
------------------------------------------------------------
------------------------------------------------------------
-------------------------------------------------------
>lcl|Query_10098
------------------------------------------------------------
------------------------------------------------------------
------------------------------------------------------------
------------------------------------------------------------
------------------------------------------------------------
------------------------------------------------------------
--------------------------MT----------AYFN--GPYLSDIRNGGDQHYN
GQSV---HNG--QAMHNGQSMCAQQNGEDS-----CDQ--RQYM-Q--PQYA-G-SPAQG
A-TYPRFPPYDRLEIRPITASSDESSSPPGPYY-SQCSQQQTQ--NTI----PQPAHQTQ
QQQQPQHQQQQPQHTNPLSHPNAYVPQ-DQVPPPVTVQTNCRGSP-----TDPQ---SMV
PQHYP-SCKMQNQQP-------------MMPDPNV-VHQQ-RA-DCAA------TNG--Y
PQH---------CHSP--VH-SPP----QS-MYPNN------HPNHVNHVNA--QQQPPP
QQQNQVQPPPPGGGPSP------------LY-----------------------------
---------------------------------PW-MRSQ--------------------
------------------------------------------------------------
------------------------------------------------------------
---------------------------------------------FER------------
---------------------------KRGRQTYTRYQTLELEKEFHFNKYLTRRRRIEI
AHALCLTERQIKIWFQNRRMKWKKE-NKAKME-AGMVMGPNGP-ELHHL--DRPPMTAV-
------------------------------------------------------------
------------------------------------------------------------
------------------------------------------------------------
------------------------------------------------------------
------------------------------------------------------------
------------------------------------------------------------
------------------------------------------------------------
------------------------------------------------------------
------------------------------------------------------------
------------------------------------------------------------
------------------------------------------------------------
------------------------------------------------------------
------------------------------------------------------------
------------------------------------------------------------
-------------------------------------------------------
>lcl|Query_10099
------------------------------------------------------------
-MNSDVVYT--CRNGADPGQYGASAGGAPQ--MYND---------STGAD--LSAYYH--
-HHHHPQG----------TTAPAYL--------PTT----LMTPYSTTTDLRTSPMHPEP
ASQQHH--HQ--IISDTN-GLSYTNLGEQSHYQ---------------------------
------------------------------------------------------------
------------------------QHIQQHHHHHHQHQ----------------------
--------RVQHPQVGNPTAAYSHHHHYA------------------------------A
VAE----VPP---R--HA---------------------HSAYAY-------------RN
I---E-YP----------------HDISTVHSTPDHHAAQGV------------------
-------QLGPEGARV-VAGLSV-PTH-----YLD------------QLPRRNGY--VG-
YENYD-----------------------------------CQI-----------------
---------------------NGGY--PYATNPVHRTRGGIAP---SQPAAAAVPT----
------------------------------------------------------------
-------------------------------Y-KW-M------------QVKRS------
-------IPKP-APK---T------EY-------------------NGFNGT------S-
----------------NGDAN---------------------------------------
------------------------------------------------------------
------------------------GVGATGRTNFTTKQLTELEKEFHYHKYLTRARRIEI
ATLLGLNETQVKIWFQNRRMKQKKR------------MK---------------------
---------------------------------E--GL-ILT------------------
------------------------------------------------------------
------------------------------------------------------------
------------------------------------------------------------
---------------------DNTG-----------------------------------
------------------------------------------------------------
------------------------------------------SG----SD----------
---------------------------A-----------GASPP----------------
------------------------------------------------------------
----------------ATCISASTPTNPP-----------TVP-VPSGA-----------
-----------------------------------------------VTSPENSQ-----
------------------------------------------------------------
------------------------------------------------------------
------------------------------------------------------------
-------------------------------------------------------
>lcl|Query_10100
------------------------------------------------------------
------------------------------------------------------------
------------------------------------------------------------
--------MSSN-FMEGVLGSKF-------------GSEASPPS----------------
------AAAAL----------------SSYG----------------PTAAA--AQH---
----------------------RMYPYVSLSPQSSMSV----------------------
--------TGNLYYTSN-------------------------------------------
A-D----FA-----------------------K------SCRYNSA---------QAANG
L---D-AA----------------TAASG-YSFNLQ--NCAA----A-----------AA
AAVAA--------SG-TGS-GSMMAPS-NFFPHPA-------ST-DLGASITS-------
----------------------------------------CSQ---L-------------
-----------------------GM---RQLEQM----------------P-DVPR----
------------------------------------------------------------
-------------------------------Y-PW-M------------TIAA-------
-----------------------L----N------------------FAGPN--------
-----------------GCPRRR-------------------------------------
------------------------------------------------------------
-----------------------------GRQTYTRFQTLELEKEFHFNHYLTRRRRIEI
AHALCLTERQIKIWFQNRRMKLKKE------------LR---------------------
---------------------------------AVKEINEQA------------------
------------------------------------------------------------
------------------------------------------------------------
------------------------------------------------------------
---------------------RMDS-----------------------------------
------------------------------------------------------------
------------------------------------------------------------
-------------SKDKD----DK--DK-----------NGNIDIK--------------
--------------------------------------------------------KDD-
------------------KK---------NEHLHHH---HATVGLLNPP----------L
L----------------------------------------------I--DDRNRS----
----------------P------KA-----------------------------------
------------------------------------------------------------
------------------------------------------------------------
-------------------------------------------------------
>lcl|Query_10101
------------------------------------------------------------
------------------------------------------------------------
------------------------------------------------------------
------------------------------------------------------------
------------------------------------------------------------
------------------------------------------------------------
------------------------------------------------------------
------------------------------------------------------------
------------------------------------------------------------
------------------------------------------------------------
------------------------------------------------------------
-------------M----------------MEV---TCESGFINSQPSMAEFMTAL----
PHINETFHR--VSSINSLQQPPTAPGQQ---GGPTLCQLEVAQQQ---L---HGVAGN--
--PSPPPSGKPHNGA---GSGLGGSSV--AEY-PW-MKEKK----------TSR------
-------KQHQ-------------------------------------------------
------------------------------------------------------------
-------ENNENGM---------------------------------P------------
---------------------------RRLRTAYTNTQLLELEKEFHFNKYLCRPRRIEI
AASLDLTERQVKVWFQNRRMKHKRQ-TLMSK---NGDEK----GDMEGGETPTSSSTPTG
AGSTL--------SGNEAET-KNDSADDRSATETSSSVGSPER--PKQKKMRTSIATDNP
PHNERSPSSSAAATSATDGLQDAVSPGSTSDRLIS---LDSE--LSMSAQPHLHSPTTSS
ADI---LTSTPIKSSPMMS--------DLKSPDNSLSSSPP----T----EPLVGNI---
--TERPHMMSSVDSKNIRIQSQGLHNGYGRGSGTTTVPIN-HRKLNQT------CNIDT-
AMPYCNSPC-N-INCS-PVPAVNTCPASSPGSLYSPTIGNVNAQQRPPQHMSPTTTYHRT
--RQYSSALPYHAD---SN-VMTGYGHTGHRGISPNSVQSSY---CY-RSMATNHNQHSQ
YPNHQSQNMDNDWVSH---TNGYP-TPVQSTTSYYN---NNNDQ-----LRSNVNACSTQ
HGQ---------MSHSTS-----AGMNATAHSV-------QQRNGM-----NHPSVHGRS
S----YGYPVDSSTLQSH-------H--QQHSQNDFVQEY--DS-DINQDY---RNY---
---DGYDATNVVVQNNQYP-QSNINPDG----SVSYCY---P-SHAT--SNNS-YRQETF
EDSNP-QAIYYDLS-----N---STA--TANRVPDYS--ATAPKQNFSQGNN---LYDVN
HTIGDTANIP-NY---SQPADNYNGQC----TTDGDIPFNY--YDSSESYASSSNTNNNA
NNTNTSNNTNNNNNAVSNGNSTTCGTTDFNFL-TLASEFSS-PEYYQLS-----------
------------------------------------------------------------
-------------------------------------------------------
>lcl|Query_10102
------------------------------------------------------------
------------------------------------------------------------
------------------------------------------------------------
------------------------------------------------------------
------------------------------------------------------------
------------------------------------------------------------
------------------------------------------------------------
------------------------------------------------------------
------------------------------------------------------------
------------------------------------------------------------
------------------------------------------------------------
------------------------------MES-G-VMESGFINSQPSMAEFMTGL----
PHVNDGY--GPGSSINDGS---AASSLP---PLAPQPGPAAVVAQPQQQ--QPPADGS--
--PPRPTNNNKANG----GYP-PGVGV--PEY-PW-MKEKK----------TTR------
-------KQPQ-------------------------------------------------
------------------------------------------------------------
-------ETTDNGM---------------------------------P------------
---------------------------RRLRTAYTNTQLLELEKEFHFNKYLCRPRRIEI
AASLDLTERQVKVWFQNRRMKHKRQ-TLLTK---NGEDK----D---------------G
GDRAM-------DSGSDGATGCDSNEPDLDSDHGMASSRTPDTRDSTAASNNKDATS---
LDSDAGDSCCVRTP----------SP-AKPDTVVQ------D--AEQQQQHSVMKSSTTT
VAG---LISSVVTPSISSGLSPVHTQSERQPTPMSVHEVAAAVLASSTAQEHSKLSCPPT
TNQTTSQQ-VCDIVSPITNS-SRNVPNYTR--QM--SSTA---QLQS---M---CNIDI-
-----RQSAKNPTLSPVTSTSLISV--SPNSYSTPA----AAQPPCPVMQPAATPSYQKS
--RMYSN--PYPPD---PG--ISAYTPTGQTSSSPQAG-PTY---CY-GTPPPQPTNQTQ
RVHNRTAMEVPSFDIPV-QQTPYKLAN-VSSDGYYA-----NLP-QSAPTQNMTNGCHQP
S----------------------------QHQQP--QQHHNMYSVQQ---QQQQQ-----
------------------------------------------------------------
------------------------------------------------------------
------------------------------------------------------------
------------------------------------------------------------
------------------------------------------------------------
------------------------------------------------------------
-------------------------------------------------------
>lcl|Query_10103
------------------------------------------------------------
------------------------------------------------------------
------------------------------------------------------------
------------------------------------------------------------
------------------------------------------------------------
------------------------------------------------------------
--------------------------MS----------SYYT--NSYMPDMRTGGGVET-
-------YNG--QPV---------QANGDL-----CDQSQRQYI-Q--PQYA-S-SPVQG
A-TYPRFPPYDRLEIRPITS-SPTSPSPPAQYYSNPCNQAPQG--PPL----PQPAHQPP
Q-HAP------------MNHPNAYVPQ-DG-------QNNCRGSP--HDTN--Q-HQSMT
QAQYP-SCKMQPNPVQHGGPPPPHQP-PMGHDPNGVVHRQ----ECGPPPP--PNNM--P
P-----------CQSP--VQ-SP-----QQ-QQQP----PQMYQNHAGPPPQPSQQQVQA
QQVQQPPPPPGGNMPSP------------LYPWMRSQFGLDDCEDDSEEKCSP-ELAEEF
DTLSPYDTLPPPPPPPPQPVLSPEGSDAAAFYHQK-PEERSDMVH---------------
------------------------------------------------------------
----------------------------------------N-------------------
-----------------PMH-------------------------LER------------
---------------------------KRGRQTYTRYQTLELEKEFHFNRYLTRRRRIEI
AHALCLTERQIKIWFQNRRMKWKKE-NKAKLE-AGLAMGPTPP-ELTHL-SDHGPQ----
------------------------------------------------------------
------------------------------------------------------------
------------------------------------------------------------
------------------------------------------------------------
------------------------------------------------------------
------------------------------------------------------------
------------------------------------------------------------
------------------------------------------------------------
------------------------------------------------------------
------------------------------------------------------------
------------------------------------------------------------
------------------------------------------------------------
------------------------------------------------------------
------------------------------------------------------------
-------------------------------------------------------
>lcl|Query_10104
------------------------------------------------------------
------------------------------------------------------------
----------------------------MVLLYLQAEPGTSQAKCSGMMN---GTLY-ED
TSNNSRS----------------------------------SVEVVQQ----QS-QSSSL
QT----GPLHI----------------PAKR----------------VPTSS---LAVS-
AYGHS-------------DCGAVV--DGT-GLSSTGST----------------------
------------VIR-HSH-H--GHQPWG-------------------------------
YS-----PEN---H--SA-----------FESH------PSQYNQ----------S-LC-
----R--D----------------GM-SPAYYYNDHHSRSS-----V-----------TT
DRKPQ--LKFWPNS-YELPS--AAAAS-S-AVPST-------DT-C-QS-FVAQS--WCN
YSPYS--SRVP-THM------------------EP--HA-PQP---V-----AYLP-SED
SSRTRGPVE--------------A---FPHPDT--YTL---RT--FAS-AEV-HSQ----
------------------------------------------------------------
-------------------------------P-TY-V-----------PAGAV-------
-------------------------------------------TEPTATNPLEWTGNVTV
------------------------------------------------------------
------------------------------------------------------------
---------------------------RKKRKPYSKFQTLELEKEFLFNAYVSKQKRWEL
ARNLNLTERQVKIWFQNRRMKSKKN------------SQ---------------------
----------------------------------RNAENNQNN--------NNTLANTN-
------------------------------------------------------------
------------------------------------------------------------
------------------------------------------------------------
--------------------GQ--------------------------------------
------------------------------------------------------------
----------------------------------------GPIV----K-----------
------------------------------------------------------------
------------------------------------------------------------
------------------------------------------------------------
------------------------------------------------------------
------------------------------------------------------------
------------------------------------------------------------
------------------------------------------------------------
-------------------------------------------------------
>lcl|Query_10105
------------------------------------------------------------
------------------------------------------------------------
------------------------------------------------------------
------------------------------------------------------------
------------------------------------------------------------
------------------------------------------------------------
------------------------------------------------------------
------------------------------------------------------------
------------------------------------------------------------
------------------------------------------------------------
------------------------------------------------------------
------------MKLE--------Q-----------QQQQGHPRVDTTTCGMRYY-----
------------------------PTV---------------------------------
-------------------------------E-ES-SN----------------------
-------PFSDNLSRQYHHHHPRMPD------NKLYPK----------------------
RQQCYDWKP-----IESPNCWYNSAG-NFGQQELVRNPGIN-------------------
-----IGR---NGPGG---------------------------SATIPTPI-----SQIG
DYDWTFNGQKSNNRVSMTADQADLEPPKRTRTVFSNTELVELEKEFYTNRYINKPKRQEL
SSKLGLTERQIKIWFQNRRMRFKKE-QKEKGY-HVSDSGSSS------------------
---------------------------------PLSSSASSSPMLPLSPMMGNTAPNQTA
APNPMSGFAE--ASSVPFSSVVKQECAAEFSVGENKYCYNNAP-----------------
--RLPSYEGFCTQDRGSVYPNTEQQ--------------QVRYNTSCQRESYQPQPQNAY
HHQCDRTNFNSNHGGSVTTTNDEVKNFAPAYPYQNNYSWNGHDYHNYNNPQHGSNQDHQF
GSAVVKTQDFGSFSSPFENPNHASQESSGYGAPTMPENVQPSFAEWREPVHHPVINQGHN
NSYNYSQL----------------------------------------------------
------------------------------------------------------------
------------------------------------------------------------
------------------------------------------------------------
------------------------------------------------------------
------------------------------------------------------------
------------------------------------------------------------
------------------------------------------------------------
------------------------------------------------------------
-------------------------------------------------------
>lcl|Query_10106
------------------------------------------------------------
------------------------------------------------------------
------------------------------------------------------------
----------------------------------------------------MS-----S
YQFVNSLT-S-------------------CY----------GQRGGDSSSQDYYTPQVQ-
TYG---------------GCYS--------GPGS--PV-------------QQ-------
---YGP-YPQHSIP---HL--Q-----------NG---------GGDHH-FNSCS-----
-------------------------------------------------------Q--RL
-----------------------THP------NASQSPRTPTP-----SVT-PVPSCKY-
----------A-EPS--TAS-----------PQDL-----STNASHPPPPASS-------
-----------PE-------------SR-TSPVVSPRQ--SSQ-QPPATVQHHSSSSQPS
AQQAPNPSTQSQA--------QQQQ---QQQASPQ-QAQAAPQPTQDSTSPQQGQ-----
--------------QKPNYT-NNPPQ----------------------------------
------------------------------IY-PW-MR----------------------
-------KVHVGQN----------------------------------------------
------------G-----------------------------------------------
----------VNAM-------------------------------GET------------
---------------------------KRQRTSYTRYQTLELEKEFHFNRYLTRRRRIEI
AHALCLSERQIKIWFQNRRMKWKKE-----------------------------------
------------------------------------------H----------KLAST--
MPPQI-------------------------------------------------------
------------------------------------------------------------
-------------------------------------------PQVM--IDHHAHHHHHQ
LPY---------YHTQHHLQHHLHG----------------------ETKA---------
------------------------------------------------------------
------------------------------------------------------------
------------------------------------------------------------
------------------------------------------------------------
------------------------------------------------------------
------------------------------------------------------------
------------------------------------------------------------
------------------------------------------------------------
------------------------------------------------------------
-------------------------------------------------------
>lcl|Query_10107
------------------------------------------------------------
--------------------------------------------MMNSYFEN-SGFYN--
-GQSGVS----------------------EQSYR-FPQGLLVPPYH----QAAARPA---
-------------------------------------------HEATYVDSA-S-TNGVN
ST----T---------------------ACK----------------LYPAS---D-AG-
GV-FK------------AECLA---KDQN-GFNQAVKD----------------------
--------MAN-WSA-NALSSVRQ------------------------------------
SGG----LTA---D--QMRS---------FQQG------GES------------------
------------------------------------------------------------
--------------AVASPR--ANEAA-------W-------SQ-CCQN-----------
------------------------------------------------------------
-------------------------------SPAA------------AQTPT-NAF----
------------------------------------------------------------
-------------------------------Y-PW-------------M-----------
----AIA------------G----------------------------------ANGL-R
------------------------------------------------------------
------------------------------------------------------------
---------------------------RRGRQTYTRYQTLELEKEFHSSHYLTRRRRIEM
AHALCLTERQIKIWFQNRRMKLKKE------------IQ---------------------
---------------------------------AIKELNEQER--------QAQAAKAA-
------------------------------------------------------------
------------------------------------------------------------
------------------------------------------------------------
--------------------ITTG------------------------------------
------------------------------------------------------------
-----------------------------------------GSS----GNAQ-N-----G
GSSGNSSAKT----SPVVE-GTTV-ISAKT------------------------------
------------------------------------------------------------
------------------------------------------------------------
------------------------------------------------------------
------------------------------------------------------------
------------------------------------------------------------
------------------------------------------------------------
-------------------------------------------------------
>lcl|Query_10108
------------------------------------------------------------
---------------------------------------------MNTYFEQ-SGFYN--
-GQSAA-----------------------EQSYR-FPQGLLVPPYPPQPSTARSSSSTHD
NGTAYP------------------------------------VDATVN-NAS-S-ATNAA
AP---------------------------CK----------------LYSNSGSDS-GA-
TL-FK------------PECLA---KDQN-GFNQAVKD----------------------
--------MATAWPSAGSLTGVRS------------------------------------
AS-----MPG---E--AMRP---------FP--------T-D------------------
------------------------------------------------------------
--------------NTGATR--VSDA--------W-------ST-CCQN-----------
------------------------------------------------------------
-------------------------------TTA------------MAQAPA-NAF----
------------------------------------------------------------
-------------------------------Y-PW-------------M-----------
----AIA------------G----WC----------------------------ANGL-R
------------------------------------------------------------
------------------------------------------------------------
---------------------------RRGRQTYTRYQTLELEKEFHTNHYLTRRRRIEM
AHALCLTERQIKIWFQNRRMKLKKE------------IQ---------------------
---------------------------------AIKELNEQER--------QAQAAKMA-
------------------------------------------------------------
------------------------------------------------------------
------------------------------------------------------------
--------------------AQ--------------------------------------
------------------------------------------------------------
-------------------------------------------Q----PKGQ--------
QTSGNANAGA-DSTAAANK-----------------------------------------
------------------------------------------------------------
------------------------------------------------------------
------------------------------------------------------------
------------------------------------------------------------
------------------------------------------------------------
------------------------------------------------------------
-------------------------------------------------------
>lcl|Query_10109
------------------------------------------------------------
------------------------------------------------------------
------------------------------------------------------------
------------------------------------------------------------
------------------------------------------------------------
------------------------------------------------------------
------------------------------------------------------------
------------------------------------------------------------
------------------------------------------------------------
------------------------------------------------------------
------------------------------------------------------------
------------------------------------------------------------
------------------------------------------------------------
------------------------------------------------------------
-------------------------MGET-------------------------------
------------------------------------------------------------
------------------------------------------------------------
---------------------------KRQRTSYTRYQTLELEKEFHFNRYLTRRRRIEI
AHALCLSERQIKIWFQNR------------------------------------------
------------------------------------------------------------
------------------------------------------------------------
------------------------------------------------------------
------------------------------------------------------------
------------------------------------------------------------
------------------------------------------------------------
------------------------------------------------------------
------------------------------------------------------------
------------------------------------------------------------
------------------------------------------------------------
------------------------------------------------------------
------------------------------------------------------------
------------------------------------------------------------
------------------------------------------------------------
-------------------------------------------------------
>lcl|Query_10110
------------------------------------------------------------
------------------------------------------------------------
------------------------------------------------------------
------------------------------------------------------------
------------------------------------------------------------
------------------------------------------------------------
------------------------------------------------------------
------------------------------------------------------------
------------------------------------------------------------
------------------------------------------------------------
------------------------------------------------------------
------------------------------------------------------------
------------------------------------------------------------
------------------------------------------------------------
------------------------------------------------------------
------------------------------------------------------------
------------------------------------------------------------
------------------------------RQTYTRYQTLELEKEFHFNRYLTRRRRIEI
AHALCLTERQIKIWFQNRRMKWKKE------------NK---------------------
-----------------------------------AKLEAG-------------------
------------------------------------------------------------
------------------------------------------------------------
------------------------------------------------------------
------------------------------------------------------------
------------------------------------------------------------
------------------------------------------------------------
------------LAMGPTPPELTH-LGEHPQQ----------------------------
------------------------------------------------------------
------------------------------------------------------------
------------------------------------------------------------
------------------------------------------------------------
------------------------------------------------------------
------------------------------------------------------------
-------------------------------------------------------
>lcl|Query_10111
------------------------------------------------------------
------------------------------------------------------------
------------------------------------------------------------
------------------------------------------------------------
------------------------------------------------------------
------------------------------------------------------------
------------------------------------------------------------
------------------------------------------------------------
------------------------------------------------------------
------------------------------------------------------------
------------------------------------------M---T-----DCCQQ-GT
IKRQGDMQK--------------GC--Y---EPYPASTDFLTSSYPLQMS----------
------------------------------------------------------------
--------------------------------------------------------PDLC
IAQRSACLMQGQ-------NFVPFDGQHP--------------NEIWGRGVISNNG-FFP
YPTEVTFPDP-SDFQDH-----------------------------LYSWAKE-SRVKHH
QQQQQQRRVCSPTI-----------------QGSTT------------------------
---------------------GGEQPTKRARTAYTNAQLVELEKEFHFNRYVNRPRRLDM
AQQLNLTERQIKIWFQNRRMRYKKE------------QRD--------------------
-----------------------------------KGILIDNK------TPSPLMVSAS-
------------------------------------------------------------
------------------------------------------------------------
------------------------------------------------------------
--------------------SS--P-----------------------------------
------------------------------------------------------------
---LP-----------------------------------QPTS----PVMG-------A
TAPQTSTPSGSAPITASVPSQG-------GF-L-----GGATPPVPTVKSETCVVGLQQQ
QQQPQLSAKHFTDGICDI-SGGMDNKRPIGYLQSNPNHNYNSHQSSCPPT--------CS
HQNNMVASSNSQ--DFLQPHVGQQPFVHSETMMPSTLHPNIPPNYAQNPQYTGNITSSFS
RHQHPVLGSFEE---QPHAVPSFHSYEHQRHYNQNIYLSYNSERCNQNLAVTHHSDQ---
-----QQALPGHPHAVSEFLNHNAVKAE-----GQSHQAVQC-LDNQWEMFHERSQDNY-
---E----APSLTHL---------------------------------------------
------------------------------------------------------------
-------------------------------------------------------
>lcl|Query_10112
------------------------------------------------------------
------------------------------------------------------------
------------------------------------------------------------
------------------------------------------------------------
------------------------------------------------------------
------------------------------------------------------------
------------------------------------------------------------
------------------------------------------------------------
------------------------------------------------------------
------------------------------------------------------------
------------------------------------------------------------
------------------------------------------------------------
------------------------------------------------------------
------------------------------------------------------------
------------------MKSYTDTNQGP-------------------------------
------------------------------------------------------------
------------------------------------------------------------
---------------------------KRTRQTYTRYQTLELEKEFHFNRYLTRRRRIEI
AHTLGLTERQIKI-----------------------------------------------
------------------------------------------------------------
------------------------------------------------------------
------------------------------------------------------------
------------------------------------------------------------
------------------------------------------------------------
------------------------------------------------------------
------------------------------------------------------------
------------------------------------------------------------
------------------------------------------------------------
------------------------------------------------------------
------------------------------------------------------------
------------------------------------------------------------
------------------------------------------------------------
------------------------------------------------------------
-------------------------------------------------------
>lcl|Query_10113
------------------------------------------------------------
------------------------------------------------------------
------------------------------------------------------------
------------------------------------------------------------
------------------------------------------------------------
------------------------------------------------------------
--------------------------MS----------SYFN--GPYLTDIRNGGGEQQP
QQQQQQHYNG--QQMHN-------QPNGDS-----CDQ--RQYL-Q--PQYA-S-SPAQG
A-TYPRFPPYDRLEIRPITA-SENSPSPPGHYY-SQCSQQSPLPQGNM----PQPAHQPQ
Q-HAP------------LSHPNAYVPQ-DGV------QANCRGSP-------TD-PQTIV
PQQYP-SCKLQQAQ--------------MNHDPNG-VHRPVNP-DCAN------NNM--H
------------CQSP--VH-SPP----QQ-MYPS---------NHVAATNP----P--N
-AVNQVQPPPTTGGPSP------------LY-----------------------------
---------------------------------PW-MRSQ--------------------
------------------------------------------------------------
------------------------------------------------------------
---------------------------------------------FER------------
---------------------------KRGRQTYTRYQTLELEKEFHFNRYLTRRRRIEI
AHALCLTERQIKIWFQNRRMKWKKE-NKAKIE-SGLIMGPGGP-ELAHH-MERPPQ----
------------------------------------------------------------
------------------------------------------------------------
------------------------------------------------------------
------------------------------------------------------------
------------------------------------------------------------
------------------------------------------------------------
------------------------------------------------------------
------------------------------------------------------------
------------------------------------------------------------
------------------------------------------------------------
------------------------------------------------------------
------------------------------------------------------------
------------------------------------------------------------
------------------------------------------------------------
-------------------------------------------------------
>lcl|Query_10114
------------------------------------------------------------
------------------------------------------------------------
------------------------------------------------------------
------------------------------------------------------------
------------------------------------------------------------
------------------------------------------------------------
------------------------------------------------------------
------------------------------------------------------------
------------------------------------------------------------
------------------------------------------------------------
------------------------------------------------------------
------------------------------MES---GCESGFINSQPSMAEFMTAL----
PHINETFHQ--GSSINGGGSTVLPPPPP---PPGPLCQLES--QAPAAP-ICAGNS----
--PPPPPNAKHPTSAAANGGGFPGVSV--PEY-PW-MKEKK----------TTR------
-------KQHQ-------------------------------------------------
------------------------------------------------------------
-------ENNENGM---------------------------------P------------
---------------------------RRLRTAYTNTQLLELEKEFHFNKYLCRPRRIEI
AASLDLTERQVKVWFQNRRMKHKRQ-SLMTK---NGDEK----GC-DGSDRH--------
-----------LDSGSDGATGGDSNGPDLDSDHGMSQSRTP---DHGDSGKDITNL--SA
LDSDAGDSCCVPTP----------SPNPKSDPAIT----EGS--DQR--SVSLKSPSIAT
GNN----SCPAVSPSSVSS--------ERRATPNKMTESVV----VSTNDARSNTDTTTF
T-SLVTKPVVCEV---ITPTTSNRGHCGFRSSQTSTTAPK----SSPL------CPVDT-
RG----SGN-NPMICP-TTPPIVHA--PSPSTPYSTP----TQKNCASSQMSPSPTYQRP
--RMYSG--PYPPD---PGIGV--YTPTGQPAPSPPTG-PTY---CY-RTPPPN---HSQ
TVHS--QSVEGSYNMHMSQRG-YKCSPPSSSSYYPV---VGQGQ-QSSAAHPMSNGCPPQ
QQQ--QLSSMYPVQHGTPLQ------SQTLMSQTP----MMPQR----PQPQQHQQHQRG
-----YPYSGDQDT-------------------SSYMSDY-----------SQSRSYDS-
-----YQEMP--VNGDQY---VSGIPAGSQAGNNGYCY---P-PYRG--EGGYASNPAIV
QQTNEVHNIYYDMN-----S---VNS--EEIV---YS--GASSKQNLSQDS---GYYELQ
NATSDVPSMA-DY---HTSPERYNGQA----T-ENDFNYNC--YGETDCYSS--------
---------ATTG-----------STNDFNFL-NIANDYGA-PEYYQLS-----------
------------------------------------------------------------
-------------------------------------------------------
>lcl|Query_10115
------------------------------------------------------------
------------------------------------------------------------
------------------------------------------------------------
------------------------------------------------------------
------------------------------------------------------------
------------------------------------------------------------
------------------------------------MSSYYA--SSYIPDLRSSGE----
------PYNG--QPVHT-------QPNGEL-----CDQSQRQYI-Q--PQYA-S-SPAQG
A-TYPRFPPYDRLEIRPITS-SPNSPSPPGQYYGNPCNQAPQG--PPL----PQPAHQPP
Q-HAP------------MSHPNAYVPQ-DGQ--------NCRGSP--QDPNGQH--GSLS
PAQYP-SCKMQPQPPPPPHPPPQHQQPQMGHDPSAVVHRQVNS-ECPP-----ANSM---
PPC----------QSP--VH-SPQ----QPQMYPQQ--------NHNGPPPN---QQPVQ
QQPVQQPPPPGGNMPSP------------LY-----------------------------
---------------------------------PW-MRSQ--------------------
------------------------------------------------------------
------------------------------------------------------------
---------------------------------------------FGF------------
---------------------------SRNIQDRSCCMRTA-------------------
------------------------------------------------------------
------------------------------------------------------------
------------------------------------------------------------
------------------------------------------------------------
------------------------------------------------------------
------------------------------------------------------------
------------------------------------------------------------
------------------------------------------------------------
------------------------------------------------------------
------------------------------------------------------------
------------------------------------------------------------
------------------------------------------------------------
------------------------------------------------------------
------------------------------------------------------------
------------------------------------------------------------
-------------------------------------------------------
>lcl|Query_10116
------------------------------------------------------------
------------------------------------------------------------
------------------------------------------------------------
------------------------------------------------------------
------------------------------------------------------------
------------------------------------------------------------
------------------------------------------------------------
------------------------------------------------------------
------------------------------------------------------------
------------------------------------------------------------
------------------------------------------------------------
------------------------------------------------------------
------------------------------------------------------------
------------------------------MK-KV-------------------------
---------HVG---------T-------AA-----------------------------
-------N----------------------------------------------------
----------ANGN-F-P--------------------------GVEP------------
---------------------------KRQRTAYTRHQILELEKEFHFNRYLTRRRRIEI
AHALCLSERQIKIWFQNRRMKWKKD-NKLPNT-KNVKKKNPN------------------
---------------------------------NATANASNNN-T----TNNNNSNTN--
--NSNNSN----------------------------------------------------
------------------------------------------------------------
-------------------------------------------PD-----QQNTN---RM
T------------SQQTQPPTLQPV----------------------GPPP---------
--PHHIVG-----------------------------------------PPPHSQ-----
-PPP-----------------------------------LVMD-----------------
-------------------TKTDYGLTEL-------------------------------
------------------------------------------------------------
------------------------------------------------------------
------------------------------------------------------------
------------------------------------------------------------
------------------------------------------------------------
------------------------------------------------------------
-------------------------------------------------------
>lcl|Query_10117
------------------------------------------------------------
------------------------------------------------------------
-----------------------------------------------MMN---GSLY-EE
TSD-SRS----------------------------------SVEVVQP----SQ-Q-SSI
QQ----GPLHI----------------PAKR----------------A-TGS---LAVS-
-YGHP-------------ECA--V--DTG-------------------------------
----------GGVIR-HSH-H-ASQSPWG-------------------------------
YG-----TDS---H--SA-----------FDSH------P-QYNQ----------T-LCN
V---R--D----------------GM-TTGYYYNDHGTRVV------------------S
DRKPP--IKFWSNT-YELPS--AGP---S-TVAST-------DT-C-QT-FAPQT--WCN
YAPYS--GRVP-GPM------------------DP--HA-PQP---V-----TYLP-ADE
--RPRGPVD--------------T---FSHSDG--YTL---RT--FTG-AES-HTQ----
------------------------------------------------------------
---------------------------------AY-A-----------PAGTV-------
-------------------------------------------TDAVSTNPLEWTGNVTV
------------------------------------------------------------
------------------------------------------------------------
---------------------------RKKRKPYSKFQTLELEKEFLFNAYVSKQKRWEL
ARNLNLTERQVKIWFQNRRMKSKKN------------SQ---------------------
----------------------------------RNVENTQNN--------HNSAAT-N-
------------------------------------------------------------
------------------------------------------------------------
------------------------------------------------------------
--------------------GQTTT-----------------------------------
------------------------------------------------------------
----A--------------------------------------V----K-----------
------------------------------------------------------------
------------------------------------------------------------
------------------------------------------------------------
------------------------------------------------------------
------------------------------------------------------------
------------------------------------------------------------
------------------------------------------------------------
-------------------------------------------------------
>lcl|Query_10118
------------------------------------------------------------
-------------------------------------------MMMNTYFEQ-SGFYN--
-GQGSAAA-----------------T---DQPYR-FAQGLLVPPYSTQPGAVAARAA---
-------------------------------------------HEATYGDGT-A-TSGGS
AA----AAAAA----------------AACK----------------LYTGS---D-AA-
GV-FK------------SECLA---KEQN-GFNQAVKD----------------------
--------MTTNWPA-STLSSVRP------------------------------------
TA-----MTN---D--AMRS---------FA--------G-E------------------
------------------------------------------------------------
--------------APTAPR--VSDA--------W-------SQ-CCQN-----------
------------------------------------------------------------
-------------------------------PPP------------IAQNPAANAF----
------------------------------------------------------------
-------------------------------Y-PW-------------M-----------
----AIA------------G----------------------------------ANGL-R
------------------------------------------------------------
------------------------------------------------------------
---------------------------RRGRQTYTRYQTLELEKEFHTNHYLTRRRRIEM
AHALCLTERQIKIWFQNRRMKLKKE------------IQ---------------------
---------------------------------AIKELNEQER--------QAQAAKAA-
------------------------------------------------------------
------------------------------------------------------------
------------------------------------------------------------
--------------------AIQP------------------------------------
------------------------------------------------------------
--------------------------------------------------QQ--------
---STTSTTTTKTTAIDAV-TTTP-VDAKT------------------------------
------------------------------------------------------------
------------------------------------------------------------
------------------------------------------------------------
------------------------------------------------------------
------------------------------------------------------------
------------------------------------------------------------
-------------------------------------------------------
>lcl|Query_10119
------------------------------------------------------------
--------------------------------------------MMNSYFEQ-SGFYN--
-GQAAAAA-----------------AAAAEQPYR-FPQGLLVPPYPPQPSSGRSSTA-HD
TAAASY------------------------------------VDANTNTN------STSA
A----------------------------CK----------------LYSNSVSEG-GS-
TI-FK------------PECLA---KDQN-GFNQAVKE----------------------
--------MAS-WPS-GSLTGVRP------------------------------------
TS-----MGG---E--TMRP---------FN--------A-D------------------
------------------------------------------------------------
--------------NATSPR--VTDA--------W-------ST-CCQN-----------
------------------------------------------------------------
-------------------------------TTA------------MAQAPA-NAF----
------------------------------------------------------------
-------------------------------Y-PW-------------M-----------
----AIA------------G----WC----------------------------ANGL-R
------------------------------------------------------------
------------------------------------------------------------
---------------------------RRGRQTYTRYQTLELEKEFHTNHYLTRRRRIEM
AHALCLTERQIKIWFQNRRMKLKKE------------IQ---------------------
---------------------------------AIKELNEQER--------QAQAAKLA-
------------------------------------------------------------
------------------------------------------------------------
------------------------------------------------------------
--------------------AQ--------------------------------------
------------------------------------------------------------
-------------------------------------------Q----KSQQ-Q-----S
TPSTGASATS-ESSAAAAK-TYG-------------------------------------
------------------------------------------------------------
------------------------------------------------------------
------------------------------------------------------------
------------------------------------------------------------
------------------------------------------------------------
------------------------------------------------------------
-------------------------------------------------------
>lcl|Query_10120
------------------------------------------------------------
MMNSNLVYGGGGGGGGGGGVCPTAD--------YSTQPYSCAD--------HLVTQVY--
-YPQSADSL---------AAGHYLN--------GSGSGGGLYTS--TAVDPR--PADVPS
SN------HQ--IINDTSSGLSYTNL-DHTSAA---------------------------
------------------------------------------------------------
------------------------------AFHSSQQN----------------------
--------RGPHVALAPTTQPAQHGLGST-------------------------------
-------VQP---G--FCPS-----------PH------DTRGNFC---------R---S
L---D-Y------------------D-VGPTP------HGVP------------------
-------DLSSDCSRV--GVVT----S-TYSPYLE-------HL---TIPRRNGY-GYA-
-ESYD-----------------------------SVMRDSCQV-----------------
---------------------NGGY--HHGSPPLART----TQ---PQPSP--VPT----
------------------------------------------------------------
-------------------------------Y-KW-M------------QVKRS------
-------LPKP-APK---S------EF-------------------GYNGG--IINGSGG
G---------------GAGGGLS-GG-GTPTNPAG-------------------------
------------------------------------------------------------
--------------------------PGSGRTNFTTKQLTELEKEFHFNKYLTRARRIEI
ATALQLNETQVKIWFQNRRMKQKKR------------MK---------------------
---------------------------------E--GL-IPS------------------
------------------------------------------------------------
------------------------------------------------------------
------------------------------------------------------------
---------------------EVAA-----------------------------------
------------------------------------------------------------
------------------------------------------AK----EN----------
---------------------------S-----------PTGAAA---------------
------------------------------------------------------------
---------------------TPNGTVNP--------------SVGTSP-----------
-----------------------------------------------LTAKDSNQ-----
------------------------------------------------------------
------------------------------------------------------------
------------------------------------------------------------
-------------------------------------------------------
>lcl|Query_10121
------------------------------------------------------------
------------------------------------------------------------
------------------------------------------------------------
------------------------------------------------------------
------------------------------------------------------------
------------------------------------------------------------
------------------------------------------------------------
------------------------------------------------------------
-----------------------------------------------------------M
PYDSPV-SPYTNDNNNNVPHAAANTPA-SAIVPKE-------FH-GGSNIVGGGD--TED
IHPHH-VEATHRLLG------------------HHSDAEEKRI---S-----FSEDGSLN
SSR----HQ--------------RL--FL--Q----YY-QQQS---HAQVPASRLL----
------------------------------------------------------------
-------------------------------P-LN-TSTGQSD---QTSRY-SY---IGR
L-HDTQTSLSPPVGTE-CNPCYQQSASAVSPFTGYISYSVEKRNADEDRKMPSYVGGGAS
DVF--KPVYPWMVDSRHNARNRQNQQTPQSGNGQQLLHHLG-------------------
------------------------------------------------------------
-----------------------EQPAKRARTAYTSAQLVELEKEFHFNRYLCRPRRIEM
AALLNLTERQIKIWFQNRRMKYKKE------------QKAKG------------------
---------------------------------FFNIHTEKNI--------PSP--TSA-
------------------------------------------------------------
------------------------------------------------------------
------------------------------------------------------------
--------------------TESPL-----------------------------------
------------------------------------------------------------
---TQ-----------------------------------SPTS----PTVSSV-KSNVN
SVPGGSIDYH---TGPGHSPSFTLSQRGSPNVSSGEDQMSLG---------PHSEMQITS
SRHHQLDLPEKPSC-NPSLFQFHPSRQ--QSYNLHRNPHPPLSSTEGEGFFSHRHMHQEN
QSSGDQQEDV-----DRKP--FSLNVSSTPPVIQQTLSSSPASPSPSAPASFTRQQS-GS
HSQETENLSTHSNHPYRSSSSISSASIGARPIFPHAEEWDPLGGSSQNPSNTGQSSVGGF
LSAAIDFT-PNSVRAMNAAVSSNPFQSPLHHGSYYYHHPHAQHLNPQMSHEWLVSTQGTE
VTQKYMPTASPPKLTHL-------------------------------------------
------------------------------------------------------------
-------------------------------------------------------
>lcl|Query_10122
------------------------------------------------------------
------------------------------------------------------------
------------------------------------------------------------
------------------------------------------------------------
------------------------------------------------------------
------------------------------------------------------------
-------------------MNSPAY--------------A-DPKFPPSEEYSQGNYIPTH
GGD---YFGP---QH------------------------HHPYGY-----------SVNS
P---HAGG----VSYGP----ENGTG-P-GFTNHGSSPHHY-----------YQHSCSLS
QN------------TVT-------PLP-TSVDHVA-------TSHSPVPIHHR-------
--------HGSPV----------------SSPPPPGTGLQPPPHHQSSV----PQQQQQQ
Q---------------------------TGPNSDGSG-----------------Q-----
------------------------------------------------------------
----------------------------PVIY-PW-MK----------------------
-------KVHTN---------Q--------A-----------------------------
------------------------------------------------------------
----------SNGT-Y-P--------------------------GLEP------------
---------------------------KRQRTAYTRHQILELEKEFHFNRYLTRRRRIEI
AHSLCLSERQIKIWFQNRRMKWKKD-NKLPNT-KNVKKKQ--------------------
------------------------------------------------------------
------------------------------------------------------------
------------------------------------------------------------
------------------------------------------------------------
------------------------------------------------------------
------------------------------------------------------------
------------------------------------------------------------
------------------------------------------------------------
------------------------------------------------------------
------------------------------------------------------------
------------------------------------------------------------
------------------------------------------------------------
------------------------------------------------------------
------------------------------------------------------------
-------------------------------------------------------
>lcl|Query_10123
------------------------------------------------------------
-MNSNSVYASVCRNGDGTTAYGTAGS-------YNGQVGGAVSGPTSGTDLSAAQVYY--
-HQQTSDRL-------VQPSGPPYL--------TTT----LMTPYSSGPDPRTPPLHSDS
ANGH-----Q--IISESN-GLSYTNL-DQSHS----------------------------
------------------------------------------------------------
-------------------------HYPSPHHHSHQQQ----------------------
--------RVAHPHPGNPTHTFHHHHYSA-------------------------------
VAD----VAP---R--PTH--------------------GTYHPY-------------RN
L---D-YD----------------LSGHSVHQTSEHGHPQSM------------------
-------TIGPEGARV-VPGFGV-NPT-TY-PYLD-------TL---SLSRRNGY--GG-
YENYD-----------------------------PALRESCQV-----------------
---------------------NGGY--QCGS-AVHRNR--VAT---TQPTP--VPT----
------------------------------------------------------------
-------------------------------Y-KW-M------------QVKRS------
-------VPKP-AVK---P------DY-------------------SGY-SS------NP
N---------------NGDPN---------------------------------------
------------V-----------------------------------------------
-----------------------LGGAGTGRTNFTTKQLTELEKEFHFNKYLTRARRIEI
ATALQLNETQVKIWFQNRRMKQKKR-----------------------------------
------------------------------------------------------------
------------------------------------------------------------
------------------------------------------------------------
------------------------------------------------------------
------------------------------------------------------------
------------------------------------------------------------
------------------------------------------------------------
------------------------------------------------------------
------------------------------------------------------------
------------------------------------------------------------
------------------------------------------------------------
------------------------------------------------------------
------------------------------------------------------------
------------------------------------------------------------
-------------------------------------------------------
>lcl|Query_10124
------------------------------------------------------------
------------------------------------------------------------
------------------------------------------------------------
--------MSSN-FMDTFLGNKY-------------ATDA--VS----------------
------S---L----------------SGYG----------------H-P-----QH---
----------------------RMYPYASLSPQSSVAV----------------------
--------SGTLYYTSN-------------------------------------------
A-D----LAA----------------------K------SCRYSSN----------QGNG
L---D-IS----------------AS--S-YAFNLQ--NCGV--T---------------
-------------SPAAAAASAMMAPA-QFLPHPA-------TD--LASTISP-------
----------------------------------------CSQ---L-------------
-----------------------GY---RQLDPI----------------P-DVPR----
------------------------------------------------------------
-------------------------------Y-PW-M------------TIAGW------
-------TEHSLHAG-----------YRS------------------LRSPN--------
-----------------GCPRRR-------------------------------------
------------------------------------------------------------
-----------------------------GRQTYTRFQTLELEKEFHFNHYLTRRRRIEI
AHALCLTERQIKIWFQNRRMKLKKE------------LR---------------------
---------------------------------AVKEINEQA------------------
------------------------------------------------------------
------------------------------------------------------------
------------------------------------------------------------
---------------------RLEA-----------------------------------
------------------------------------------------------------
------------------------------------------KL----KD----------
----------QDDSKKKG---ASGSSEK-----------KEISSSSSSSSKDQS------
-----------------------------------------------------RQEKEK-
ISV----DDRGHRESVQDENDDSRHSTN--TDISTS---SIGDIVDKSP----------E
-----------------------------------------------ESLAMRPVI----
----------------PSSDEASLP-----------------------------------
------------------------------------------------------------
------------------------------------------------------------
-------------------------------------------------------
>lcl|Query_10125
------------------------------------------------------------
------------------------------------------------------------
------------------------------------------------------------
------------------------------------------------------------
------------------------------------------------------------
------------------------------------------------------------
------------------------------------------------------------
------------------------------------------------------------
------------------------------------------------------------
------------------------------------------------------------
------------------------------------------------------------
------------------------------------------------------------
------------------------------------------------------------
------------------------------------------------------------
------------------------------------------------------------
------------------------------------------------------------
------------------------------------------------------------
-------------------------------QTYTRFQTLELEKEFHFNHYLTRRRRIEI
AHALCLTERQIKIWFQNRRMKLKKE------------MR---------------------
---------------------------------AVKEINEQAR--------MESKSKDG-
------------------------------------------------------------
------------------------------------------------------------
------------------------------------------------------------
--------------------SDKDK-----------------------------------
------------------------------------------------------------
---NS-----------------------------------GDDT----NTTAIN-----K
SVKEERKVSEQIST--------NSAVLNSPGLVVEDCK-------------------VRS
SQT---------------------------------------------------------
------------------------------------------------------------
------------------------------------------------------------
------------------------------------------------------------
------------------------------------------------------------
------------------------------------------------------------
-------------------------------------------------------
>lcl|Query_10126
------------------------------------------------------------
------------------------------------------------------------
------------------------------------------------------------
------------------------------------------------------------
------------------------------------------------------------
------------------------------------------------------------
------------------------------------------------------------
------------------------------------------------------------
------------------------------------------------------------
------------------------------------------------------------
------------------------------------------------------------
------------------------------------------------------------
------------------------------------------------------------
------------------------------------------------------------
------------------------------------------------------------
------------------------------------------------------------
------------------------------------------------------------
-----------------------------KRKPYSKLQTLELEKEFLFNAYVSKQKRWEL
ARNLNLTERQVKIWFQNRRMKNKKN------------SQ---------------------
-----------------------------------RNGQEPN-------------G-AG-
------------------------------------------------------------
------------------------------------------------------------
------------------------------------------------------------
--------------------LAVPA-----------------------------------
------------------------------------------------------------
---GA-----------------------------------IAHH----PHNK--------
------------------------------------------------------------
------------------------------------------------------------
------------------------------------------------------------
------------------------------------------------------------
------------------------------------------------------------
------------------------------------------------------------
------------------------------------------------------------
-------------------------------------------------------
>lcl|Query_10127
------------------------------------------------------------
------------------------------------------------------------
------------------------------------------------------------
------------------------------------------------------------
------------------------------------------------------------
------------------------------------------------------------
------------MIMSSFLMNSGSY---------------ADPKFPPTEEYSQSSYIPTH
G-T--DYYGH-------------------------------HHQG-------Y---GYGI
S---NGQH-AAGINYGRPD--QPNGG----YPSHHHVP--SSY---------YPQPCTLG
HQQ---NIGVHHGLVPS------------SGPTS-----------GPPGPQTL-------
-----------GH----------------ESPTSAGILTSNAA--NNNIMHRSNHHHLHQ
R---SPGSSPPPLGSL----MATSD--VSVTNSGQKHESAIQQDCNPANNSS-SH-----
------------------------------------------------------------
----------------------------PIIY-PW-MR----------------------
-------KVHVTNPA---------------------------------------------
------------------------------------------------------------
-----------AAT-Y-S--------------------------GMES------------
---------------------------KRQRTAYTRNQILELEKEFHYNRYLTRRRRIEI
AHALCLSERQIKIWFQNRRMKYKKD-NKLPNT-KNVRNRHHQ------------------
---------------------------------QQP-PLQTSL-A---------DDND--
--RNPINQ----------------------------------------------------
------------------------------------------------------------
-------------------------------------------IL---------------
---------------GNQQLNIPER----------------------EYDLTAL------
------------------------------------------------------------
------------------------------------------------------------
------------------------------------------------------------
------------------------------------------------------------
------------------------------------------------------------
------------------------------------------------------------
------------------------------------------------------------
------------------------------------------------------------
------------------------------------------------------------
-------------------------------------------------------
>lcl|Query_10128
------------------------------------------------------------
------M----------VETVGKNDVNICDNYATAI---------KAMYYGQ--------
--DD--------------------------------------------------------
------------------------------------------------------------
--------SSN----------------PEYG----------------HPHPQIQPYPTA-
NYDDP------------HHIAPDSYQPP----TGQFHY----------------------
--------QT--RPFFGHYTGGL-------------------------------------
-----------------------------TKTS------SPVSDRS---------GSG--
F---E--T----------------DY--HHLQGGHHPSVMS-------------------
ASLAAS-TGAYQSSP----------------REGT-------DV-LPWMMMRDSR--QNI
PHNLH-Q-----QTQ------------------QLQQPSPPPH---L-----SHISPPTS
TANT---PK--------------WH--RTSPQPHH----------------KT-------
------------------------------------------------------------
---------------------------------PQ-L-----------SDADQ-------
------------------------------------------------------P----A
------------------------------------------------------------
------------------------------------------------------------
---------------------------KRARTAYTSAQLVELEKEFHFNKYLCRPRRIEM
ASLLNLTERQIKIWFQNRRMKYKKD------------QK---------------------
----------------------------------TKGDGTGSP--------TSPSNSLA-
------------------------------------------------------------
------------------------------------------------------------
------------------------------------------------------------
--------------------GHE-------------------------------------
------------------------------------------------------------
-------------------------------------------------TNSP-------
SASLQHMPPHISMAASSPQQEFLAFQQYYNKDIRLNG--------QVDEVAAQPNSCVPQ
IKLEDSN--------------------QFVEQKTFQ--EFIPQQWQNFSNGYPDSSGRND
VYHPVSTHPVPVS--APPKLT----------------HL---------------------
------------------------------------------------------------
------------------------------------------------------------
------------------------------------------------------------
------------------------------------------------------------
-------------------------------------------------------
>lcl|Query_10129
------------------------------------------------------------
------------------------------------------------------------
------------------------------------------------------------
------------------------------------------------------------
------------------------------------------------------------
------------------------------------------------------------
------------------------------------------------------------
------------------------------------------------------------
------------------------------------------------------------
------------------------------------------------------------
------------------------------------------------------------
------------------------M-LVNGMES---GCESGFINSQPSMAEFMTAM----
PGRMNGDTA-YGSPANVAV----CPMDG---SAANVAATAATNTSPSPV-----TAGHRN
PVGRPGNAGGKNSKI---SADLNLNAV--QEY-PW-MKEKK----------TSR------
-------KHHQGGAKG--------------------------------------------
--------------------NKH----------GAWDGNSS------------VNYS-FD
-------QVGENGL---------------------------------P------------
---------------------------RRLRTAYTNTQLLELEKEFHFNKYLCRPRRIEI
AASLDLSERQVKVWFQNRRMKHKRQ-SN-GK---SGDEK----GSDDGMKGPTKSSCASP
CSRTVDSDCSSTKSEPQLATGAEIQHCDGTFEIRGPIDRLPPS-------------PNGN
LNGDSVDMYSESID---GSVNK--SPQVSQDACPEET--DEE--GALKMIQSRDPPTIEE
LGT--------ESSGGVANA-------DYNSDVKITMKSSPV---------PAMISTSPI
P---------CGKTSNNSLTEYGTEMQQTKTAYPCYGTNS----------------IGP-
-------PP-NRIVTS-------HD--QAPSVYHHQS----------------SPNYNSS
S---------YHTTR---G-AVGGQYQSGMSQYSSSYGQMPH---QQ-----HVINQEAY
GGMQTSAQNKNTYQGYY-QTEQYN--------GYSSSMADGNSY--------VQQTRMPH
HSQ--------------------------QYSQDS-------RTSVQ----HQQSV----
P----YTYLTSPNTQATVPQLT---------SHQQQQQNA--------------QNYGSM
------DSTSAGRHYQQSY-ASSYGNDG------KHCA---NSEFID--SNQY----QTY
NQDQASYDMAYNGSST-VNA---QQP--QQQQQQDFS--TTTIKQSIQSETTP------T
NAGLATADTP-GITSVSPIRAPYNGSS----SE------NSGISSVDSGYSSYNYFD---
-------------------NSGAGNTNDFNFL-NITNELTS-PDFY--------------
------------------------------------------------------------
-------------------------------------------------------
>lcl|Query_10130
------------------------------------------------------------
------------------------------------------------------------
------------------------------------------------------------
------------------------------------------------------------
------------------------------------------------------------
------------------------------------------------------------
------------------------------------------------------------
------------------------------------------------------------
------------------------------------------------------------
------------------------------------------------------------
------------------------------------------------------------
------------------------------------------------------------
------------------------------------------------------------
------------------------------------------------------------
----------------------MRSQFER-------------------------------
------------------------------------------------------------
------------------------------------------------------------
---------------------------KRGRQTYTRYQTLELEKEFHFNRYLTRRRRIEI
AHALCLTERQIKIWFQNRRMKWKKE------------NK---------------------
-----------------------------------P------------------------
------------------------------------------------------------
------------------------------------------------------------
------------------------------------------------------------
------------------------------------------------------------
------------------------------------------------------------
------------------------------------------------------------
------------------------------------------------------------
------------------------------------------------------------
------------------------------------------------------------
------------------------------------------------------------
------------------------------------------------------------
------------------------------------------------------------
------------------------------------------------------------
-------------------------------------------------------
>lcl|Query_10131
------------------------------------------------------------
------------------------------------------------------------
------------------------------------------------------------
------------------------------------------------------------
------------------------------------------------------------
------------------------------------------------------------
------------------------------------------------------------
------------------------------------------------------------
------------------------------------------------------------
------------------------------------------------------------
------------------------------------------------------------
------------------------------------------------------------
------------------------------------------------------------
------------------------------------------------------------
------------MRKVHIGQNGLSNGMET-------------------------------
------------------------------------------------------------
------------------------------------------------------------
---------------------------KRQRTSYTRYQTLELEKEFHFNRYLTRRRRIEI
AHALCLSERQIKIWFQNRRMKWKKE------------HK---------------------
---------------------------------QLPGSMSG-------------------
------------------------------------------------------------
------------------------------------------------------------
------------------------------------------------------------
------------------------------------------------------------
------------------------------------------------------------
------------------------------------------------------------
------------QIPGMPPN------LGDPK-----------------------------
------------------------------------------------------------
------------------------------------------------------------
------------------------------------------------------------
------------------------------------------------------------
------------------------------------------------------------
------------------------------------------------------------
-------------------------------------------------------
>lcl|Query_10132
------------------------------------------------------------
------------------------------------------------------------
------------------------------------------------------------
------------------------------------------------------------
---------MN----------------S--------------------------------
NAVYN------------NMCNGGGVDSAYFGHQAAYGS----------------------
--------NVYY-PTQSGDSLQNTTHYYNG------L----------------------G
GQA----TMP---S--SDHHRTPPLHPN-LDGT------CNAHQII---------SESNG
L---C-YT----------------QLVEPEYANGCGQNGSGTG-QQT-----------EY
GGTAV--TLTVDGGGGVGGPLYNSRDI-DYGIHRT-------TDGINTGQLSTIHNGTKT
MSSSP-SPTINSGYG--IY--------------YESSAAAQAV---VPRHKVYD-EPLHH
HMHQNMTSTGQITATV--THPTSHH--HHQLHQQQHTTQPPPN---NCPTVSSSPV----
------------------------------------------------------------
-------------------------------Y-QW-M------------RVKRN------
-------IPKPVTNN---TN--HG-NY-------------------NQANSN-ISAKMSG
GCIG------------GGGGGGG-GV-GGTPTSASSIA----------------------
------ANLNN-------------------------------------------------
----------------------------TGRTAFNTKQLTELEKEFHFNKYLTRARRIEI
ASALTLNETQVKIWFQNRRMKQKKR------------LK---------------------
---------------------------------E--GQ----------------------
------------------------------------------------------------
------------------------------------------------------------
------------------------------------------------------------
------------------------------------------------------------
------------------------------------------------------------
------------------------------------------------------------
------------------------------------------------------------
------------------------------------------------------------
-----------------REKIILKD-----------------------------------
------------------------------------------------------------
------------------------------------------------------------
------------------------------------------------------------
------------------------------------------------------------
-------------------------------------------------------
>lcl|Query_10133
------------------------------------------------------------
---------------------------------------------MSSYF----------
------------------------------------------------------------
-----------------------------------------------------------G
NI----SANNW----------------PSAS----------------QDQFYVQNAAAA-
KYGMN------------YG---DNHFAAQYATTSPSPF----------------------
--------VA-RYPNYGHHMSASSAIPGA------------------------------K
SAS----VSS---V--SNYD---------HQTT------NNPHNAA---------SPP--
T---S--Y----------------DA-STHGFYTNIAAAAA-------------------
ARAASE-NQALSHTPPAGAS--LDARD-YSLTSSG-------AS-CKLGSSANSA--SAN
SGSAA-GGGSVTPTG------------------YSLSPGLGNT---P-----NGDT-SYT
NASY---AN--------------SV--VRNLSND--NS---NC--NSTQNGSKSNF----
------------------------------------------------------------
-------------------------------Y-PW-M-----------KSYTD-------
------------------------------------------------------N-SSGP
------------------------------------------------------------
------------------------------------------------------------
---------------------------KRTRQTYTRYQTLELEKEFHFNRYLTRRRRIEI
AHALGLSERQIKIWFQNRRMKAKKE------------NK---------------------
----------------------------------LQGMNSSG------------------
------------------------------------------------------------
------------------------------------------------------------
------------------------------------------------------------
------------------------------------------------------------
------------------------------------------------------------
------------------------------------------------------------
------------------------------------------------------------
----------------------------------------LSPPLSNPADPKDMVKEELV
------------------------PS----------------------------------
------------------------------------------------------------
------------------------------------------------------------
------------------------------------------------------------
------------------------------------------------------------
-------------------------------------------------------
>lcl|Query_10134
------------------------------------------------------------
------------------------------------------------------------
------------------------------------------------------------
--------MSSN-FIDSML-PKY-------------QSES--------------------
--------GAV----------------VNYS----------------PH------QP---
----------------------RMYPYVTVPHQTSVSS----------------------
--------ATCVPYCSN-------------------------------------------
PAE----LG-----------------------K------SCRYSNE---------NSSEA
A---A-AA----------------AAAAANYSINLQ--NCAA--S---------------
-----------------AT--SMVSPS-QFYHHAG-------AE---ANSLNS-------
----------------------------------------CSQ-----------------
----------------------------PVNNPA----------------P-DIPR----
------------------------------------------------------------
-------------------------------Y-PW-M------------SITG-------
--------------------------------------------------PN--------
-----------------GCPRRR-------------------------------------
------------------------------------------------------------
-----------------------------GRQTYTRFQTLELEKEFHFNHYLTRRRRIEI
AHALCLTERQIKIWFQNRRMKLKKE------------MR---------------------
---------------------------------AVKEINEQA------------------
------------------------------------------------------------
------------------------------------------------------------
------------------------------------------------------------
---------------------RREA-----------------------------------
------------------------------------------------------------
------------------------------------------AE----KE----------
----------KQQREVEGRAAAASSTSH-----------GSPAHSV--------------
--------------------------------------------------------KGTV
APP----SSIPKMESSCCSSGSSSNGGG--SGPNSR---SESPKGKTHT-----------
------------------------------------------------------------
------------------------------------------------------------
------------------------------------------------------------
------------------------------------------------------------
-------------------------------------------------------
>lcl|Query_10135
------------------------------------------------------------
------------------------------------------------------------
-----------------------------------------------MMN---GSLY-ED
NSNNNRS----------------------------------SLEVTPP-----S-QPTVQ
ST----GPLHI----------------PAKR----------------V-ATT---VAVS-
-YTHP-------------ECTA-------------ESS----------------------
--------VAAGVIR-HSH-G---GQPWS-------------------------------
YAA----DNH---A--AAAA---------AAAF------DSQYNQ----------T-LC-
----R--E----------------GM-TPSYYYN---ADAR------------------A
DRKPL---AFWPNK-YDLPS--AGP---S-SV-PA-------EP-C-QP-FPAQT--WCN
YPPYP--SRV--SHM------------------DG--HT--QP---V-----SYLA-ADE
--RPRPPMD--------------G---YAH-DG--YSL---RN--YTA-TEP-VVS----
------------------------------------------------------------
-------------------------------T-PY-A-----------PESLT-------
-------------------------------------------------NPLEWTGNVTV
------------------------------------------------------------
------------------------------------------------------------
---------------------------RKKRKPYSKFQTLELEKEFLFNAYVSKQKRWEL
ARNLNLTERQVKIWFQNRRMKNKKT------------AKGI-------------------
----------------------------------RQIVPNSEV--------LETCF----
------------------------------------------------------------
------------------------------------------------------------
------------------------------------------------------------
------------------------------------------------------------
------------------------------------------------------------
------------------------------------------------------------
------------------------------------------------------------
------------------------------------------------------------
------------------------------------------------------------
------------------------------------------------------------
------------------------------------------------------------
------------------------------------------------------------
------------------------------------------------------------
-------------------------------------------------------
>lcl|Query_10136
------------------------------------------------------------
------------------------------------------------------------
------------------------------------------------------------
------------------------------------------------------------
------------------------------------------------------------
------------------------------------------------------------
--------------------------MS----------SYFT--NSYLTDLRSPPS----
-----EHYGG--PTIGT-------PPNSEP-----CDPSLRTQI----PHYG-S-PAAQG
P-TYPRFPPYDRLEIRPITG----GGAAPAQYY------SPAQ---GL------------
----PA------------------IPD--GQ--------NCRNSP--PGHLSHQAVQPMV
P-QYS-SCKMQQQQMPQHA--PPQHQQLTMHQPPPQVHHQPPP-QVQVQHQHQQLSM--P
PQQHPHPHTQQLTQHPQ-HQQHPPAVVHQHHQHPPPPPPHSQHQQHPPPPPQPPPLSQPP
TQQQPPPPPPTQQQPPPPTAPQPPQQQPALSN--SGPESPNDQTNDTGNHVMN-QNGSPT
DSPQMYGQTRDGQANNQQGGQNGSNNTPSPLY-PW-MRSQ--------------------
------------------------------------------------------------
------------------------------------------------------------
---------------------------------------------FER------------
---------------------------KRGRQTYTRYQTLELEKEFHFNRYLTRRRRIEI
AHALCLTERQIKIWFQNRRMKWKKE-NKAKLE------GAGGDLCLTGL-----EQ----
------------------------------------------------------------
------------------------------------------------------------
------------------------------------------------------------
------------------------------------------------------------
------------------------------------------------------------
------------------------------------------------------------
------------------------------------------------------------
------------------------------------------------------------
------------------------------------------------------------
------------------------------------------------------------
------------------------------------------------------------
------------------------------------------------------------
------------------------------------------------------------
------------------------------------------------------------
-------------------------------------------------------
>lcl|Query_10137
------------------------------------------------------------
------------------------------------------------------------
------------------------------------------------------------
------------------------------------------------------------
------------------------------------------------------------
------------------------------------------MLIIDSRRSLQTVKRQLG
RKIISIQFTQKLMIMSSFLMNSASY---------------VDPKFPPNEEYSQSSYISSP
PAA--EYYGP---------------------------PPAQH----------Y---GYSN
L---NSHH---AVNYGR------ETV---SYTNHG--P---SY---------YQQPCGLT
HGQ---PQPLPGQIAPA--------PN-SQSPV-------------PPTPAH--------
---------RSPG----------------PSPPAPQL---PPG-------------QPQQ
G---------------------LGD--PDSPNA-----------CSQQSSSS--Q-----
------------------------------------------------------------
----------------------------PVIY-PW-MK----------------------
-------KIHVNTA----------------------------------------------
------------------------------------------------------------
-----------NNT-FQP--------------------------GNEP------------
---------------------------KRQRTAYTRQQILELEKEFHFNRYLTRRRRIEI
AHTLCLSERQIKIWFQNRRMKWKKD-NKLPNT-KNVRRTNPN------------------
---------------------------------AARNNNHHHP-H---------HQIT--
--SHQHQQ----------------------------------------------------
------------------------------------------------------------
-------------------------------------------PQ---------------
---------------QHHHPNVQQQ----------------------QQIAQVPL-----
-----SDI-----------------------------------------VPQNCP-----
-PHPH-HGPQTTQHAPK-------------------QDSYGLTA----L-----------
------------------------------------------------------------
------------------------------------------------------------
------------------------------------------------------------
------------------------------------------------------------
------------------------------------------------------------
------------------------------------------------------------
------------------------------------------------------------
-------------------------------------------------------
>lcl|Query_10138
------------------------------------------------------------
---------------------------------------------MSSYF----------
------------------------------------------------------------
-----------------------------------------------------------S
NI----SPNNW----------------SNNN----------------QEQFYVQN---A-
KYANH------------HYPVVSENYNQ---YNTSPPF----------------------
--------AP-RYP------------A-F------------------------------G
RLE----VGT---V--P--------------SK------SVAYDSQ---------T----
P---T--Y----------------D---GQSF--------------------------LT
AVAPRT-EADYP-------------------------------S-CKHGGF---------
----------------------------------------------T-----ANTGAISD
TCA--------------------------AQQPF--DV---GQ--TLGYPPKPPNF----
------------------------------------------------------------
-------------------------------Y-PW-M-----------KSYTD-------
------------------------------------------------------S-GHGP
------------------------------------------------------------
------------------------------------------------------------
---------------------------KRTRQTYTRFQTLELEKEFHFNRYLTRRRRIEI
AHALGLTERQIKIWFQNRRMKAKKE------------NK---------------------
----------------------------------LQNGQSTE------------------
------------------------------------------------------------
------------------------------------------------------------
------------------------------------------------------------
------------------------------------------------------------
------------------------------------------------------------
------------------------------------------------------------
------------------------------------------------------------
----------------------------------------TTDEIKQERTKDDDEMTDDD
------------------------EGLCS-------------------------------
------------------------------------------------------------
------------------------------------------------------------
------------------------------------------------------------
------------------------------------------------------------
-------------------------------------------------------
>lcl|Query_10139
------------------------------------------------------------
------------------------------------------------------------
------------------------------------------------------------
------------------------------------------------------------
------------------------------------------------------------
------------------------------------------------------------
------------------------------------------------------------
------------------------------------------------------------
------------------------------------------------------------
------------------------------------------------------------
-----------------------------------------------------------M
NGYNERGED--------------YQ--SFHGNNNEYQQ---CS--HRQMSVDNGGI----
------------------------------------------------------------
-------------------------------Y-PW-M-----------MNGNPIKQVQTS
QTFSASKMTPQNQVYTLVESTIPNQAQAF-----TASKIPSQNQVQVHVESTEFEKLATN
------------------------------------------------------------
------------------------------------------------------------
---------------------------KRSRTAYTQSQLLELEKEFHF-NYLCRPRRLEL
ASLLNLTERQIKIWFQNRRMKIKKI------------KDQQL------------------
---------------------------------DDKKATSTNL--------HQQCSNNV-
------------------------------------------------------------
------------------------------------------------------------
------------------------------------------------------------
--------------------QHLSI-----------------------------------
------------------------------------------------------------
---RN-----------------------------------DSSS----NESSNN-----A
AQRHQVPITYTYPQHHAAINSNNTQLLPSIKSYPECPAVQDKASGSPPLPPSCQGLSSPT
VPLWIQHQVNQQFPQFFAEYFDMEAAPHLSSF----------------------------
------------------------------------------------------------
------------------------------------------------------------
------------------------------------------------------------
------------------------------------------------------------
------------------------------------------------------------
-------------------------------------------------------
>lcl|Query_10140
------------------------------------------------------------
------------------------------------------------------------
------------------------------------------------------------
------------------------------------------------------------
---------MN----------------P--------------------------------
NVTFS----------------EHTYYGDPTSFAGDVTA----------------------
--------QVYYTPTVT--TALSDELYCGG------------------------------
GET----LNP---K--SPPP-PPLQLPADLPER------SDQQ--I---------ITDNG
L---S-YT----------------NLDAEPFING--------------------------
--------FAPCSSIPINNHIGGYREL-DFA---------------DITAQASGHYAYLD
AAEPP-SAA---------Y--------------LPQN----------------N-NPLYG
GPTP--SSCMLASAAV--DTFTNQQ--HVATHSFQH--QQPQQ---SITSHTPVPT----
------------------------------------------------------------
-------------------------------F-KW-M------------QVTRK------
-------QVKSSSNC---TT--YSQNY-------------------ASATNR-IS---TR
NC--------------------------------NDFA----------------------
------AN-NI-------------------------------------------------
----------------------------SGRTNFTTKQLTELEKEFHFNKYLTRARRIEI
ASALQLNEVQVKIWFQNRRMKQKKR------------IK---------------------
---------------------------------E--GSYFVP------------------
------------------------------------------------------------
------------------------------------------------------------
------------------------------------------------------------
---------------------EPSI-----------------------------------
------------------------------------------------------------
------------------------------------------QT----YT----------
---------------------------A-----------DDVFNELVG------------
------------------------------------------------------------
-------------ETNLISLPTSKETSSQ-------------------------------
------------------------------------------------------------
------------------------------------------------------------
------------------------------------------------------------
------------------------------------------------------------
-------------------------------------------------------
>lcl|Query_10141
------------------------------------------------------------
------------------------------------------------------------
------------------------------------------------------------
------------------------------------------------------------
------------------------------------------------------------
------------------------------------------------------------
------------------------------------------------------------
------------------------------------------------------------
------------------------------------------------------------
------------------------------------------------------------
------------------------------------------------------------
------------------------------MES---RCETGFINSQPSMAEFMTSL----
PHINETFHR--GSSITGTG--------M---PPPPMCGPLDEQGQLHTV---AGTTPTG-
---PPPPVTKCAAGA-AAGMGVP---V--PEY-PW-MKEKK----------TTR------
-------KTHQDT-----------------------------------------------
------------------------------------------------------------
---------QENGM---------------------------------P------------
---------------------------RRLRTAYTNTQLLELEKEFHFNKYLCRPRRIEI
AASLDLTERQVKVWFQNRRMKHKRQ-TMGKG---SDDGV--------GPTTGGSGGKGVG
PGDAD-------DGCSLSGHESSNLKGCRDASVKSDGADTPSS--PSSSCDSQSKAEVSE
LPTLASPPQHKADP----GI-DIVTGHSSPDKYIN----------GLSPLNHVPPPLDVS
VEQ------------KLVCH-----------PPNGLCSPVG--------------N----
-------SPPTGPLSNGHN-----------------TVFT----LPSPA-S-------SV
GSPGQISRVRIKVTPI-----QGAC--STGPPSKRRKSEFTEPLSSASSHGSPLENGMPS
----YYTATPTTYQ---PS-------------TRHSPGTRSY---VYPQCSQNMQHEYRQ
TPHQYP----RSSTAGIMNYPSSS----PRADHYYPDMHCNSSR-GDQGSYTGPLNQHGQ
QQIRSSPPDNYRTSPGISRQTSSTPVPVSSVPPGQTN---TRLNGVYNAPNRLPPISQQS
QQARVYAFGNNSNMSNTAQPNTC-----TPHYNEGYVQTYTTNGYETGYNYGDDTRLMNG
EQEHHHQQQQQQQQQQQYV-QSNNEHNSIDF--AGYAFTSDPIGYQTGPRGYTQTTPDMT
PPADQLQTSIMQDQYY-SDG---NTG--SQFATGNVSDYATAPKQNLAPVVNF---YEGQ
GSVGDTPNIP-AITP---SPEEQFSNG----SSEPDVNFTFNFFDQSSQNSH--------
--------------------------SDFNFLTNLANDFSP--EYYQLS-----------
------------------------------------------------------------
-------------------------------------------------------
>lcl|Query_10142
------------------------------------------------------------
------------------------------------------------------------
------------------------------------------------------------
----------------------------------------------------MS-----S
YQFVNSLA-T-------------------CY----------NQRGQDTSGQDYYTPNVQ-
SYG---------------SCYS--------PAAS--QT-------------HQY------
------PYTQASVP---HI--Q-----------NG---------D----HYSGSQ-----
-------------------------------------------------------R---L
-----------------------SHPN-----SNSRSPSTPAG-----STVGQAPSCKY-
----------AESNAG---S-----------PQDL-----SATGGHQP------------
--------------------------PQ-RSPEHQTPV--PQS-QVGG------------
----------------------QQQ---QQQPSQP-------------------Q-----
--------------NKPQYQ-SNPPQ----------------------------------
------------------------------IY-PW-MK----------------------
-------RVHLGQN----------------------------------------------
------------G-----------------------------------------------
----------VNG--------------------------------AET------------
---------------------------KRQRTSYTRYQTLELEKEFHFNRYLTRRRRIEI
AHALCLSERQIKIWFQNRRMKWKKE-----------------------------------
------------------------------------------H----------KIPSV--
NQVPG-------------------------------------------------------
------------------------------------------------------------
-------------------------------------------PIVH--ADLGSDTKG--
------------------------------------------------------------
------------------------------------------------------------
------------------------------------------------------------
------------------------------------------------------------
------------------------------------------------------------
------------------------------------------------------------
------------------------------------------------------------
------------------------------------------------------------
------------------------------------------------------------
------------------------------------------------------------
-------------------------------------------------------
>lcl|Query_10143
------------------------------------------------------------
--------------------------------------------MMNSYFDQ-GGFYG--
-SQG---------SG-----EQ---------AYR-FPLGLTVPPYP-QPQTRAH------
-----------------------------------------------QDSSYD-------
------SPATG----------------SPCK----------------LYSSSTASTDGQ-
PA-YK------------SDCAA---KDQN-GYSSTA------------------------
------------------------------------------------------------
--------------------------------------------------------KEVT
------------------------AWPGGSL-----------------------------
-----------------PVR--PAACT------PD-------SV-RSFA--------GET
GASPR-DRVPN-------------------------------------------------
--SWTQCCQ------------------NTNSSTAAS------P--VQQPATN-HTF----
------------------------------------------------------------
-------------------------------Y-PW-------------M-----------
----AIA----------------------------------------------GANGL-R
------------------------------------------------------------
------------------------------------------------------------
---------------------------RRGRQTYTRYQTLELEKEFHTNHYLTRRRRIEM
AHALCLTERQIKIWFQNRRMKLKKE------------IQ---------------------
---------------------------------AIKELNEQEK--------QAQTAKTA-
------------------------------------------------------------
------------------------------------------------------------
------------------------------------------------------------
--------------------ATLQ------------------------------------
------------------------------------------------------------
---PT-----------------------------------TNSQ----GTTD-S-----T
PTPNQAN-----------------------------------------------------
------------------------------------------------------------
------------------------------------------------------------
------------------------------------------------------------
------------------------------------------------------------
------------------------------------------------------------
------------------------------------------------------------
-------------------------------------------------------
>lcl|Query_10144
------------------------------------------------------------
------------------------------------------------------------
------------------------------------------------------------
------------------------------------------------------------
------------------------------------------------------------
------------------------------------------------------------
------------------------------------------------------------
------------------------------------------------------------
------------------------------------------------------------
-------------------------------------MQEICNTAALPLDTNPLVRKIKC
EEFPT-IRGKQPTRIGMGVRDEMEEDFAV-KARNTPPIGPVPGQEHPRIEHGGNSFWLAA
VTAAGAPHPM---LE--------------------TCTETGFINSQPSMAEFMTAL----
PQLGA--------G-------------------------ELSPQHTPP-----GYAPDL-
----------PSPGG--------GLNV--PEY-PW-MKEKK----------TTR------
-------KSSQQ------------------------------------------------
------------------------------------------------------------
----------ENGL---------------------------------P------------
---------------------------RRLRTAYTNTQLLELEKEFHFNKYLCRPRRIEI
AASLDLTERQVKVWFQNRRMKHKRQ-TLSKS--EDGDDK--------------DSTTSEG
GKSTKARLDKF-----------LDDDGPLSGKKSCQGCELPAGALCSPAEDLPELTS--R
TRNNNTPSATNNNSF---G-----SDGAS-------------------------------
---------SVTSSSSLDKL------AEEDS----RDDPTP-----------SMVTTTRN
LAKR----IKQETRKRSPSL--DAVGC-KV--SPSSSKDG----LG---------TAAG-
------LPDGAKFSSV-SITPASTPG--TPSSMHPSPIG---------HYPRPSPPNAPP
-------GPPLPQAV--PN-------------AMPP----------Y-VVRGNAP-PGQF
VTHPDF---RMDSKQFVGKLSPYP----QNNRTY--E--NYG---------PGLQSADQ-
HTY---------SRNQQHTRQEGSASARSANGIGS------------------RPAYPHE
MY-QNYGYPTYGKDQTGY------GH--AAYDHGQYAGEH--------------MTYANS
H---GYSY----------------HYHE-----GTQ-----------H-E----------
-HPHG----YYATE-----G-----Q--KNAHSNEYT-------------KNA--YYDAN
VYS---NQQA-P-----TPNAVYGPNA----PQGSTSGEQYG-GECSDGYSSFQQFY---
-------EA----THATPAGDNSNSSSDFHFLSNLANDFAP--EYYTI------------
------------------------------------------------------------
-------------------------------------------------------
>lcl|Query_10145
------------------------------------------------------------
------------------------------MMTMDVGMY--NNQQNGYGG----AEYY--
-QQGTGYQ-------------PPYE--------GYH-E----GYYEPTTHYYEPLLPGQA
AHDHPPAP----VISTDT-GLCYTNL-DYGDLQ---------------------------
------------------------------------------------------------
------------------------PNYPL---HALPQH----------------------
--------PIEPFKHRDEVPRPEEMHL---------H-----------------------
-EH----KLD--------N------------HY------L-ETKY--------------N
M---H-FV----------------DE-------------SSM------------------
-------QYNHSGSPL--------SCA-EF---------------------EH-Y---QP
KEEYG-----------------------------GLRE----------------------
-----------------------GF--PREGETMSHLIPSGHQ---SHPSHATVPT----
------------------------------------------------------------
-------------------------------Y-KW-M------------QVKRN------
-------VPKP-TAP---KLMIPPAEF-------------------V---SQ-------G
V---------------LGSPQ----D-GMRTPT-GPQMMAN-------------------
-----PLLNLN-------------------------------------------------
---------------------------NTGRTNFTNKQLTELEKEFHFNKYLTRARRIEI
ASALQLNETQVKIWFQNRRMKQKKR------------IK---------------------
---------------------------------E--GL-IVA------------------
------------------------------------------------------------
------------------------------------------------------------
------------------------------------------------------------
---------------------P--------------------------------------
------------------------------------------------------------
------------------------------------------------------------
---------------------------------------EAAPTT---------------
------------------------------------------------------------
--------------------STQTS--------------------VGSN-----------
-----------------------------------------------ENSRESS------
------------------------------------------------------------
------------------------------------------------------------
------------------------------------------------------------
-------------------------------------------------------
>lcl|Query_10146
------------------------------------------------------------
------------------------------------------------------------
------------------------------------------------------------
------------------------------------------------------------
------------------------------------------------------------
------------------------------------------------------------
------------------------------------------------------------
------------------------------------------------------------
------------------------------------------------------------
------------------------------------------------------------
-------------M-------------SSVTP-SPPSVVSDND---------DSRNSTSS
EFSNATIEKHNINNII--------I-----------TQEKSAFRPSGLSSHT-IQ-----
------------------------DIIT---EDVNYPMGN--------------------
-------------------------------N-TF-SDCKVEVLSPI----PSAFVQDYN
SRDSTGFTIHDILGLHQPFTQPHMPDETQIRYDYQLSN----------------------
YENVNNIGQNYC---SGTEEVSAEGC-LTKDDILFNSTSSQ-------------------
-----INSQVLYDRDYADKELIEYERRGLIADAKDHEKINLQESGFNNQNSSWTNHTSLS
TPIVRASTSISGTGMSSTSPPFQKGFTKRARTAYTSSQLVELENEFHQNRYLCRPRRIEL
ANYLQLSERQIKIWFQNRRMKYKKD---NKHN-KPSSSVDDS------------------
---------------------------------SPSSSKELSPSQDHKLSHVRSCGGHDR
HRRLLSDSHASHHKIYTSANDNITRPPDYSAMNSMKSTIKGQQ-----------------
--GTIELPSYTPNLSYSSYYAAGTS--------------GAAY--SPLSEVYRYTNDDSL
PSNSTLPPLTSD-SYVPNGINLKLNEDMTRFTSNTSYYSSLSNSIVMHHPPTDSYGFNAI
TSVPTPTYDEGSFTTRTSTLPLSQDSYFSYLTSAENANQLASASNNKLPPSYVSL-----
------------------------------------------------------------
------------------------------------------------------------
------------------------------------------------------------
------------------------------------------------------------
------------------------------------------------------------
------------------------------------------------------------
------------------------------------------------------------
------------------------------------------------------------
------------------------------------------------------------
-------------------------------------------------------
>lcl|Query_10147
------------------------------------------------------------
------------------------------------------------------------
------------------------------------------------------------
------------------------------------------------------------
------------------------------------------------------------
------------------------------------------------------------
--------------MSSFLMNGG------Y-QPQP------DPKFPPSEEYSQADYIPPG
------EYYQ---HQ------------------------HLQY-------------GYQ-
H---Q-Y--------------APVQI-GTSYGY-----------------GGYYH-----
----------------P-LPQH--PPV---APPPR-------PP----------------
------------E----------------PSHPSDAD-----------------------
------------------------------------HGFASSHNSDGPPGLA-ELGLRLE
R----HIEEAAPA--------------------GRKLHAL--GREGSPSSELD----EER
LLLDSPPVEDDDSSICSDNTDR-------VIY-PW-MK----------------------
-------KIHVAGA----------------------------------------------
------------------------------------------------------------
----------SNGS-FQP--------------------------GMEP------------
---------------------------KRQRTGYTRHQILELEKEFHYNRYLTRRRRIEI
AHTLVLSERQIKIWFQNRRMKWKKD-NKLPNT-KNVRRKTNP------------------
---------------------------------AGVTTTT-AK-ATPKSRSNKNTNNNDK
KKSNNNGR----------------------------------------------------
------------------------------------------------------------
-------------------------------------------PDSIENVTDNIMNDLHC
V------------GAQQNLSHDTAI----------------------SPMSHPGSMNPGH
MTPHHLHM-----------------------------------------MGLHGNLDPGM
VANL-----------------------------------SAHGS----PVSATG--C---
---------GTGIPN-QPVIKSDYGLTAL-------------------------------
------------------------------------------------------------
------------------------------------------------------------
------------------------------------------------------------
------------------------------------------------------------
------------------------------------------------------------
------------------------------------------------------------
-------------------------------------------------------
>lcl|Query_10148
------------------------------------------------------------
------------------------------------------------------------
------------------------------------------------------------
----MN---------------------------------------DLNYNAGMS-----S
YQFVNSLA-S-------------------CY----------GNQAPGRTGTPVEQTGHPG
------------LPTPGADYYNPNAAASA------YPN-------------ASYSPPQVG
HHYPQHPYRTPASG---AHM--------------Q---------PQTMIDYTQLH-----
-------------------------------------------------------PQRLG
S---TASHMHQHSNPSPGALS--------------PNLMSTPP-----SQA-TGASCKF-
----------ADSTSTTG--------------------------------VRR-------
-----------LKIFLLHL-GREELPPGFGNVGGPNPS--GTN-STKL-GLTTPIA---S
PVEHKAN--VNQ--------------NISSPASSTSSNESNDANNSSSNNTKNSK-----
--------------SSANSQ-ANPPQ----------------------------------
------------------------------IY-PW-MK----------------------
-------RVHLGQST---------------------------------------------
------------------------------------------------------------
----------VNAN-------------------------------GET------------
---------------------------KRQRTSYTRYQTLELEKEFHFNRYLTRRRRIEI
AHALCLTERQIKIWFQNRRMKWKKE-----------------------------------
------------------------------------------H----------KMASMNI
VPYHMNPYGHP-------------------------------------------------
------------------------------------------------------------
------------------------------------------Y-QFDLHPSQFAHLSA--
------------------------------------------------------------
------------------------------------------------------------
------------------------------------------------------------
------------------------------------------------------------
------------------------------------------------------------
------------------------------------------------------------
------------------------------------------------------------
------------------------------------------------------------
------------------------------------------------------------
------------------------------------------------------------
-------------------------------------------------------
>lcl|Query_10149
------------------------------------------------------------
---------------------------------------------MSSAATT-----N--
-RVSDMWN--NYVNT-----SDPNSKQSKVYNYK------QYPTMANNYYNYQNYYP-HN
GCYGNVL----------------------------------SANCSEKLCGTPT-EGIVK
SE----PNWHG----------------YSAN----------------LQTGSNGMDAIK-
KWQEM------------NQYTQQQYGNYN--YNQTNML----------------------
--------CNTSVVE--KVTDVRSMNSPGQ------C-----------------------
-------SIS---E--NYGS---------PQSV------TSDFKSI---------SPLGD
D---S--P----------------HL---RALLTKPKTKSQNQ-PYF-----------PA
CDNSST-REISQQVPYVENN--NWEKN-N-ETTSG-------KE-CNLSQFHGGF--QKV
DDQTS-IKKDAVGGA------------------PS-----PNE---V-----AQSS-MGA
AEPCQDTMT--------------RV--QAGGDNADYTE---NK--MAAAPEV-QAY----
------------------------------------------------------------
-------------------------------Y-PW-------------------------
------------------------------------------------------------
----------MKGVSGDTKKEG--------------------------------------
------------------------------------------------------------
--------------------------SKRTRQTYTRFQTLELEKEFHFNKYLSRRRRIEV
SHALGLTERQIKIWFQNRRMKAKKD------------GKL--------------------
-------------------------------------TTSPEP------F----ALDDI-
------------------------------------------------------------
------------------------------------------------------------
------------------------------------------------------------
--------------------GATKL-----------------------------------
------------------------------------------------------------
---GN-----------------------------------NVSE----YIDP-------R
QQIGLPEYPNYHAGSVQPNIGH--------------------------------------
----------------------------------IPE--------NMSHCMMPPYGGMLP
-------KM---------------------------------------------------
------------------------------------------------------------
------------------------------------------------------------
------------------------------------------------------------
------------------------------------------------------------
-------------------------------------------------------
>lcl|Query_10150
------------------------------------------------------------
------------------------------------------------------------
------------------------------------------------------------
------------------------------------------------------------
------------------------------------------------------------
------------------------------------------------------------
--------------------------MS---ANNCDSMTYFS--NAYMPDMRNGG--GHE
HQQAHAHYGA---VPQQGHEM-D-----------GCDQQLRPAQ-H---HYP-A-QPAPG
M-PYPRFPPYDRL--------------------------------------------GYY
Q-QMEQ---------------NGYRPD---SP----SQMGHMGPK--TDGYGPNGHQPAT
PAVYT-SCKLQAAAATGGA-----------------V---PGS-PPLEQAQQMPHHM--H
PQ----------QHMVQ--HGVPP--HQQ-HLMYPVDD--MQHQTQMPPMHQQSMHAQQP
PP-QQPPPNTNASLPSP------------LY-----------------------------
---------------------------------PW-MRSQ--------------------
------------------------------------------------------------
------------------------------------------------------------
---------------------------------------------FER------------
---------------------------KRGRQTYTRYQTLELEKEFHFNRYLTRRRRIEI
AHALCLTERQIKIWFQNRRMKWKKE-NKTKGE-PGSGDEPDNM------SPPTSPQ----
------------------------------------------------------------
------------------------------------------------------------
------------------------------------------------------------
------------------------------------------------------------
------------------------------------------------------------
------------------------------------------------------------
------------------------------------------------------------
------------------------------------------------------------
------------------------------------------------------------
------------------------------------------------------------
------------------------------------------------------------
------------------------------------------------------------
------------------------------------------------------------
------------------------------------------------------------
-------------------------------------------------------
>lcl|Query_10151
------------------------------------------------------------
---------------------------------------------MNSYFEQ-GGFYG--
-AHGVHQG---GGGG-----DQ----------YRGFPLGL---TYA-QP----HALH---
-------------------------------------------QPRPQDSPYD-------
------A-SVA----------------AACK----------------LYAGEQQY-----
---PK------------ADCSKPGGEQQN-GYGG--------------------------
------------------------------------------------------------
------------------------------------------------------------
----K--E----------------AWGSG-----------LGA-----------------
-----------------LVR--PAACT------PE-------AR-YS------------E
SSSPG-RA----------------------------------------------------
-LPWGNQCA--------------LP--GSAAS-AAQ------P--VHQQPTN-HTF----
------------------------------------------------------------
-------------------------------Y-PW-------------M-----------
----AIA----------------------------------------------GANGL-R
------------------------------------------------------------
------------------------------------------------------------
---------------------------RRGRQTYTRYQTLELEKEFHTNHYLTRRRRIEM
AHALCLTERQIKIWFQNRRMKLKKE------------IQ---------------------
---------------------------------AIKELNEQEK--------QAQAQKAA-
------------------------------------------------------------
------------------------------------------------------------
------------------------------------------------------------
--------------------A---------------------------------------
------------------------------------------------------------
------------------------------------------AA----AAAA-A-----A
AQGHPEH-----------------------------------------------------
------------------------------------------------------------
------------------------------------------------------------
------------------------------------------------------------
------------------------------------------------------------
------------------------------------------------------------
------------------------------------------------------------
-------------------------------------------------------
>lcl|Query_10152
------------------------------------------------------------
------------------------------------------------------------
------------------------------------------------------------
--------MSSKFIIDSML-PKYHQQFHHQNLFAGAGASPIEASLSSSLSSSLS-TSLSS
SLSGGLGAAAL----------------GAGS----------------PGAGS--PQRSSS
SSSAS------------PGAPARMYPYVS----HHQQF----------------------
--------GGSVPFSAG-------------------------------------------
G-G----L-------------------SAADDK------SCRYPTA---------VGP--
-------D----------------PMV--NYALGQH--NGGA------------------
--------------AVSAASASMAAAA-QFYHQAA-------AS--AASAANAAT-----
---AD-AMG----VA-------------------------CAQ---P-------------
-----------------------SA------QTL----------------P-EIPR----
------------------------------------------------------------
-------------------------------Y-PW-M------------SITDF------
-------PFPDWMNP------FDRVVCGE------------------FNGPN--------
-----------------GCPRRR-------------------------------------
------------------------------------------------------------
-----------------------------GRQTYTRFQTLELEKEFHFNHYLTRRRRIEI
AHALCLTERQIKIWFQNRRMKLKKE------------LR---------------------
---------------------------------AVKEINEQA------------------
------------------------------------------------------------
------------------------------------------------------------
------------------------------------------------------------
---------------------RRER-----------------------------------
------------------------------------------------------------
------------------------------------------EE----QD----------
----------RMKQQQQEKQAKLEGQHH-----------GHHVTHHH-------------
-----------------------------------------------------DPMKMP-
---------------------IDK-GSN--------------------------------
-----------------------------------------------DLLK-VNKV----
----------------PT------------------------------------------
------------------------------------------------------------
------------------------------------------------------------
-------------------------------------------------------
>lcl|Query_10153
------------------------------------------------------------
--------------------------MILRLPCPFTQTSLASLRQAPASGHSAGPAWW--
-TMMNGVGGALY-----EEAH----------ASPPGGS----PPAA--------------
------PA-------------------------AAPPSA--SSA----------------
------SPASV----------------G-------------------SNPPQ--------
------------------------------------------------------------
------------------------------------------------------------
--------PP---L--------------HIPAK------R--Y-----------------
----E--P----------------EPGVIRHA----------------------------
--------------------------Q-QPWGYPP-------D-------APGSF--EHQ
YPSAP-T--------------------------------YYN-------L--PVERERKS
TLPFWP-------------TSSGEY--KPYADG---------G---CHQGF---SQ----
------------------------------------------------------------
-------------------------------P-CW--------------NYPYG------
-------TPRG-----D-Q---PLP-------------YVSGEERR-------AAVSEAS
GFSHDA--YGLRNYAPESVSGAP-YP-PPGSLPGSLSMSVG-------------------
-----VGVGCGSS------------------NPLDW------------------------
---------------------TGQVTVRKKRKPYSKFQTLELEKEFLFNAYVSKQKRWEL
ARNLNLTERQVKIWFQNRRMKNKKN------------SQ---------------------
---------------------------------RQAAQAAQN------------------
------------------------------------------------------------
------------------------------------------------------------
------------------------------------------------------------
------------------------------------------------------------
------------------------------------------------------------
------------------------------------------------------------
------------NNNNSNANNHNHHAGH-H-HAPHHVALHHPPP----------------
----AKHHQ---------------------------------------------------
------------------------------------------------------------
------------------------------------------------------------
------------------------------------------------------------
------------------------------------------------------------
------------------------------------------------------------
-------------------------------------------------------
>lcl|Query_10154
------------------------------------------------------------
------------------------------------------------------------
------------------------------------------------------------
------------------------------------------------------------
------------------------------------------------------------
------------------------------------------------------------
------------------------------------------------------------
------------------------------------------------------------
------------------------------------------------------------
------------------------------------------------------------
-----------------------------MERLLLAPSVVQSTTQINNAGFVQPQQQQQQ
HSSGSSSGSGSSLVEF--LNSGRSS-IDLNGVVPDTAMMIGGLATTTTATQSVTAGMG--
---HDGGEE--DDENNVMLGVNVHHGPS---YYDQN--LVVASASAVLLHHQQQTSVGDL
AVSMHHDCDDDDPAA-------IIDDS--SDF-AW-MKDKK----------VGR------
-------KNSHL------------------------------------------------
------------------------------------------------------------
----------NEGL---------------------------------P------------
---------------------------RRLRTAYTNTQLLELEKEFHFNKYLCRPRRIEI
AASLDLTERQVKVWFQNRRMKHKRQ-ALAK--------K---------------------
---------------DDDGSGGSGGLGILDKVSGKEKKSKKRD-----------------
-----LMLACLGNG---------------------GD--------NHSSISAVTGGPRAS
SSS-----PITATPDSLAS------------SSSSPAEADRRKQ----------------
---------------KASSCQQAKGNNIQH--VDSSSQHS-----------------DE-
--------------------SAVGS----SSLPHPRQSQ------------PCFTNYCKP
V-------------------------PAAILDGQQQQQSPSI----------STTISPSS
RSSSGSQHSSPHSPIKV-------KNVAAPTDASAPPIRSNGTQ------VVVAQSCWPA
IQNNSTPNNSTHFGQETAATFPSESKTAGFNPLTSL--YPGQQTQQQYRQPGRPPSHYGG
FN-NTYSNGMGPETQQQ-----------HSYNNQQQLSDHP-ISSYPTGHYDFKPPVNNS
YTAAYSSPDMSPSTRVQPIAQNSCMSPRMGLVPQQQS-IKNQTGLVNKTANNFHNSVSCQ
M---DQFSNFNGTGQQQQQQ---QTTIMSNSTGTYYPS------KSVSATTGATKPADGN
HPYNNFNSYSMPMDTTSANPHKIHPHGDQQVSGGP--TGNVNKCVTYPADPAVCPTSYFS
PGSGSLSSTGWNNNY-GVHPQTVPGINKYTSSSSSSSGPTA-IKKLDEENRLQNHHNGSS
MTTSSYMAQYNNHHQQQQQQQAGTKSLVSASAEVNLSHPVGIHQPIHLTQPTHNGNVQSG
HHLNYNNNNSYAGSNNSHGAAESTHSAAGQLACDSSDFNFLSSLAGDISEYYELT
>lcl|Query_10155
------------------------------------------------------------
-MNANVLYGVCNGDGGVGVGYGSASNYATDL---AGSVYGGVYGSGSVSSNSGGGSSG--
-QASTPESS-------GPTGGSVLG--------SVGPPHYLSHQQQQTPDPRTPPLTPHD
QHTNSGLLQSGDVGGGSGNGLSYTNL-DANGYATAAAAAAAAAAATAAAASYHL-SPHSV
GTGMGQHSISS----------------V--------------------------------
SVGNS------------SAYQTDYSGQHHGSPNQQQQQ----------------------
--------QQHHQQLHQQQQQQQQHHHAQH------QH---------------------G
IQQ----QQQ---Q--QQQH-----------HH------HQQQQQ----------QHHQV
H---H-QS----------------HHGHPHHHHSVHHGHHQVH-PAM-----------TG
HGVVVDGSVGINGLSAAAVAIPTGATA-GY-GYPD-------VT---QYGARVTHPAAAA
AGHFG-SSVGPYGVG--VG--------------GPSLRDQCQV---NGMLNLVGLGAAAA
AAAQHPGQHHNQLQGQ--SGASGGG--GNGGGVQPNLNHPVQQ---QQQSN--VPT----
------------------------------------------------------------
-------------------------------Y-KW-M------------QVKRN------
-------VPKP-APR---P------EY-------------------GFGGSSPNCGNGVG
GLGGGMGGGLPGLGGLGGGGGVG-SP-GGGGNNGGNGGNGG-------------------
-----VGGLGG-L-----------------------------------------------
-----------------------GGANNTGRTNFTTKQLTELEKEFHFNKYLTRARRIEI
AAALQLNETQVKIWFQNRRMKQKKR------------MK---------------------
---------------------------------E--GL-IPP------------------
------------------------------------------------------------
------------------------------------------------------------
------------------------------------------------------------
---------------------E-PT-----------------------------------
------------------------------------------------------------
------------------------------------------LS----CT----------
---------------------------S-----------PSAPSPV--------------
------------------------------------------------------------
-----------------TDSESNASGGAP------------------SK-----------
-----------------------------------------------SESPPTPL-----
------------------------------------------------------------
------------------------------------------------------------
------------------------------------------------------------
-------------------------------------------------------
>lcl|Query_10156
-----------------------------MTEQYQ-QQQQVNLGHPE-------SAEVTT
ASLNHKAFLVGPAPL--------NSGPQHQQ-----------------------------
---HNHPASSYLISQQQS--------------------------YPQAASHSDNSAMTNG
SI---------------------SAVYGYDS-----PDCGYYEHQDCSSVDV--------
GVQ-QQQQQSYANNTRSTCAMQVSVNSPVSV---PI------------------------
------------------------------------------------------------
------------------------------------------------------------
--------------------------------------------Q---------------
------------------------QS-------SDSYPSTNTY-H---------------
HLQQ---------QQHHLGQLQH-------------------QATSGGGSTV--------
-HHFA-SSNNTAAV-------------EELSP---PQDNNVI------------------
ASYHAISTGQ------------------------------QQTQANALA-----K-----
------------------------DMI---------------------------------
-------------------------------Y-PW-MR----------------------
-------DTSALNASMKRSPFQLQTGGLTLM-----------------------------
--------------SSNNHYGAGINQ-LMSSSESLSSPISP-------------------
-------------------------------------------QPTPPTSLSPE------
------------------------QPAKRARTAYTSAQLVELEKEFHFNRYLCRPRRIEM
ATLLNLTERQIKIWFQNRRMKFKKEQKGGKGS-SGGGGGDKS------------------
---------------------------------PSPPSCSAVTSSSHSPSPPASAATTGA
AANEISGAGSP--SPSLGSHLSDPTPGSYSDAQETASLLDLPE-----------------
--PQTVNRNVKTEGGNNNNKQPPSY--------------GIHYDQGSLSPYSGCSTGTEQ
ESPERSCPQQQSTSLLQSQLSLSFGTDSFKYSSGGGLVTPTDDTGSPDDIHHHHQMQHQQ
QHHNLFSTPADSYGKHYSSFHPPAQSYSGHH-PNVAYNNNPAGNIYSVPTPSYLNVNNLG
GYFGFHHQWNSRAAAGYGS-----------------------TMFCDPLQQQHQQQQSMD
MYNAQMLSAGSNNNSPI-------------------NEQPPTTP----VTPTAV--LPGH
RFPGYQYHGEMTWSPGSNSCGNTIGAAATSSNNSTAAMMECSNPLNLFTSPSTGNTSNNI
VGLETTNQESPRLAML--------------------------------------------
------------------------------------------------------------
------------------------------------------------------------
------------------------------------------------------------
------------------------------------------------------------
------------------------------------------------------------
-------------------------------------------------------
>lcl|Query_10157
------------------------------------------------------------
------------------------------------------------------------
------------------------------------------------------------
------------------------------------------------------------
------------------------------------------------------------
---------------------M--------------------------------------
------------IAMSSFLMNSGSS--------QY----VVDPKFPPSEEYSQSSYIPAA
VSS-SDYYVP---HH------------------------QVQHYH-----------GYHG
H---HTHH----HHNGTHP--SSVTS-AASMGYYGQHPSHGGA-VVS--AGGYHGGGAYG
ANGACGIAGTGQQVQVP-MTGHVAPTL-GHHHQHQ-------PQQQHQQSPGM-------
-------IQRSPA----------------PSPTPSLTSMVTCP--SQQLGAQQQQTLGHQ
QLQLQHQHVQQQQQQP----LHQQQ--LNSSHLQQQQQQQQSHGVVGGGGVV-SQALMQH
D----QLSHLGSM--------------------VAAQQAN--GQQQQLQTQTQIQQQNNA
LQLCQPPTPNSPESDCDDGSDMSDDSHNPVIY-PW-MK----------------------
-------KIHVAGAP------S----LSDGF-----------------------------
-------L----------------------------------------------------
----------ANGG-FTP--------------------------GMEP------------
---------------------------KRQRTAYTRHQILELEKEFHFNRYLTRRRRIEI
AHSLCLSERQIKIWFQNRRMKWKKD-NKLPNT-KNVRRKTNP------------------
---------------------------------AGVTTTATGV-PIITTAANNTTTTSTP
TPTGNS------------------------------------------------------
------------------------------------------------------------
------------------------------------------------------------
---------------QSSNPPRSNE----------------------TPTFQD-------
------------------------------------------------------------
--------------------------------------------------------C---
---------G--ILN----IKPDYGLTNL-------------------------------
------------------------------------------------------------
------------------------------------------------------------
------------------------------------------------------------
------------------------------------------------------------
------------------------------------------------------------
------------------------------------------------------------
-------------------------------------------------------
>lcl|Query_10158
------------------------------------------------------------
------------------------------------------------------------
------------------------------------------------------------
---------------------------------------------------MSS-----Y
-QFVNSLASS-------------------CYVGRGSTVGAGGPDLSGMSAADYYATAMS-
NYQ---------------NCYGG--GPVGVGQPQQQPHYADFGANHLVGQHQQQQQQQQQ
QQQQQSQHPQHAMP---MSPMS-----------IG---------GGVDFTMSQAL-----
-------------------------------------------------------HVAQQ
P---MQQQQQQQQNRLQQQSALQQQQQQMRGPSAQRLHSVASP-VNLGGAVATPSSCKY-
----------AGVPDTKCLG----------SPQDL-----SLTTTTSSSSSSNALSHLNA
AVQNG-LGGGGPPLAPSNA-SVPVASSSSSSTSVTQPS--SKH-HNNHHHNNHQHDGSSG
KSKQSQQRNSHHH--------HHSKTVVAAGASSP--SSVSSVSSGDSDPHSPGQ-----
--------------HDGDSKNPNAPQ----------------------------------
------------------------------IY-PW-MK----------------------
-------RVHLGQNA---------------------------------------------
------------------------------------------------------------
----------VNAN-------------------------------GET------------
---------------------------KRQRTSYTRYQTLELEKEFHFNRYLTRRRRIEI
AHSLCLSERQIKIWFQNRRMKWKKE-----------------------------------
------------------------------------------H----------KIATMN-
---MM----HQ-------------------------------------------------
------------------------------------------------------------
------------------------------------------HPMMY-HAHHHHHHLTMA
---------------------DLTG----------------------DHKI---------
------------------------------------------------------------
------------------------------------------------------------
------------------------------------------------------------
------------------------------------------------------------
------------------------------------------------------------
------------------------------------------------------------
------------------------------------------------------------
------------------------------------------------------------
------------------------------------------------------------
-------------------------------------------------------
>lcl|Query_10159
------------------------------------------------------------
------------------------------------------------------------
------------------------------------------------------------
------------------------------------------------------------
------------------------------------------------------------
-------------------------------------------------MSSSYFGNVAA
AAAAAGGWGATTAT---AMP-H-----------HH---------H--HHHLTNQD-----
-------------------------------------------------------HQQFY
K---YGYSESSQYYGHHGQYQHHHHHHQPVV----VAPSSANP-I--ATATPSPPSFRYT
GTSH-GSYQPAAPVSFQCSTTLAPVAK-H---QSL-----EASSCTSPASSSS--SSLSA
SAS--------PSL--SSA-SPASLHDHTTAGTGPYGF--TQN-QLGS-FNPHQRQAQTL
HQQNAQQMASTNG--------PSAL-NPLLESSTPSCINNNVNPYTDLRGFQNNN-----
--------------NSSSIQ--QQPQ----------------------------------
------------------------------NH-HP-MM----------------------
-------QTHGGSYCIKNPNASSYFPGSWMQ-----------------------------
-------AY---------------------------------------------------
----------ADVV-------------------------------PNP------------
---------------------------KRTRQTYTRYQTLELEKEFHFNRYLTRRRRVEI
AHALCLTERQIKIWFQNRRMKAKKE-TTTQQH-KPEPNFAVS------------------
---------------------------------ANSSELLNGY----------SSGSADS
SPMDIKHLQQQ-------------------------------------------------
------------------------------------------------------------
------------------------------------------QQQQQPHHQHQQMILSAA
AAI---------DEEEHTVSTSTHH----------------------ETINTCSGGV---
------------------------------------------------------------
------------------------------------------------------------
------------------------------------------------------------
------------------------------------------------------------
------------------------------------------------------------
------------------------------------------------------------
------------------------------------------------------------
------------------------------------------------------------
------------------------------------------------------------
-------------------------------------------------------
>lcl|Query_10160
------------------------------------------------------------
---------------MSSYYVSSYGGGGIGGSDVVQADHYHAPAPVHVSVATGHNNSG--
-----------------------------------------------------------G
GGVHHA---------------------------------------HPGMTGSFE-----S
GPYDPSRI----------------------YHIQPQH---HNQQQQQQQQQQQHHHQHQ-
QMGCNQN-------YSQQGAYPGRYP-----PASAYAI----HQQQQQQQHQHGKAAEAG
GYFASVGQQQQQQQQQQHIRSHQQPVVIGQPEASGVVVTTQQQQQQQQHLYRPASPIISA
MAPQHGSPPLGNYTGGVVVGQITKPLVVPCQVETSSSSSTSPQLSSISYGHPTSFQAQHH
R---QIVAGVAGQQQQQ-QQQQQQHLLSHQQYLIQQQQHSIVQ-Q--QSEH-PVASYNNI
-NAS-VVEGYQQHPAVAEMAGYQQQPN-HSPPLMYNSNNNSRCASNGQMSNNNANNNYNG
QQVCG-HGPMASSAVSVSDGPVIADLDQLQQQQRQQQQQ-QQQ-QQHCVVNGKTLHPVSL
GSGADNSQQQANQ----LLLHSAIQ---QQQAVESDQQPPQSQQQQQSAQRHAQQLLVPV
GGGGLVIAGGGPVVSSAQEMTGQPDEMV---QHVGDLHGDLHGAHGDVMMDHHHHLTIDL
HQEHSPLDGSDHLPLDMDGESPPGSLHDSPLY-PW-MR----------------------
-------S----QFA---------------------------------------------
------------------------------------------------------------
----------------------------------------------ER------------
---------------------------KRGRQTYTRFQTLELEKEFHFNRYLTRRRRIEI
AHALCLTERQIKIWFQNRRMKWKKE-NKAK---------LDA------------------
---------------------------------GCLEGLLVEH-----------VLSM--
------------------------------------------------------------
------------------------------------------------------------
-------------------------------------------PQ---------------
------------------------------------------------------------
------------------------------------------------------------
------------------------------------------------------------
------------------------------------------------------------
------------------------------------------------------------
------------------------------------------------------------
------------------------------------------------------------
------------------------------------------------------------
------------------------------------------------------------
------------------------------------------------------------
-------------------------------------------------------
>lcl|Query_10161
------------------------------------------------------------
--------------------------------------------MMNSYFEQ-SGFYG--
-GHGQ-TG--------------------AEQAYR-FPLGLGVNPYG-PPSGG--------
-------------------------------------------VTRQQVDSYDQ-STAAA
AA----AAAAA----------------ASCK----------------LYEQQ--------
---YK------------LDCSK---ADQN-GYSSAGIN----------------------
--------VKSDNNS--AISSWAQAAAAAA------AD---------------------A
ARA----AQQ---G--GVND---------RGVG------VGSVGHG---------HNNIN
N---R--G----------------VVGGGGGGGVVGGGYPGVV-SNV-----------SG
GVGV----GPEAAISAVTPR--PANSV-GPNNNPW-------SP-CSLN-ATTAV--QAP
VPQHG-GGGGGVGVV------------------SQHN-----T---Q-----HSQQHQHN
SVQQHSNHN--------------TS--GQHASHAISQQ---QS--PQSQSSA-HTF----
------------------------------------------------------------
-------------------------------Y-PW-------------M-----------
----AIA----------------------------------------------GANGL-R
------------------------------------------------------------
------------------------------------------------------------
---------------------------RRGRQTYTRYQTLELEKEFHTNHYLTRRRRIEM
AHALCLTERQIKIWFQNRRMKLKKE------------IQ---------------------
---------------------------------AIKELNEQDK--------ATHTKGGG-
------------------------------------------------------------
------------------------------------------------------------
------------------------------------------------------------
--------------------I---------------------------------------
------------------------------------------------------------
------------------------------------------SS----NSSN-A-----S
TTPNGGD-----------------------------------------------------
------------------------------------------------------------
------------------------------------------------------------
------------------------------------------------------------
------------------------------------------------------------
------------------------------------------------------------
------------------------------------------------------------
-------------------------------------------------------
>lcl|Query_10162
------------------------------------------------------------
------------------------------------------------------------
------------------------------------------------------------
--------MSSK-FLDSML-TKY-------------QAEA--------------------
------AGAAA----------------VAAG----------------GSSYS--SQHA--
----------------------RMYPYVSAMGQSGFP-----------------------
---------GGVAGYSN-------------------------------------------
A------LAN------AAESAAAATAAAAQADK------QCRYTGS---------AAAAA
S---M-AE----------------AMV--NYSLGAAHQNGVA--G---------------
---------------AAAASMAQAAAA-NFYQQAA-------SAGGAAAAAAAAA-----
---AG-VDPNNPLSA-------------------------CSQ---G-------------
-----------------------GP--PTGLGALAGVHS--------GGGP-DIPR----
------------------------------------------------------------
-------------------------------Y-PW-M------------SITGF------
-------PYATGMDGS---GSFASHDGFSHAGI--------------CSGPN--------
-----------------GCPRRR-------------------------------------
------------------------------------------------------------
-----------------------------GRQTYTRYQTLELEKEFHFNHYLTRRRRIEI
AHALCLTERQIKIWFQNRRMKLKKE------------LR---------------------
---------------------------------AVKEINEQA------------------
------------------------------------------------------------
------------------------------------------------------------
------------------------------------------------------------
---------------------RRER-----------------------------------
------------------------------------------------------------
------------------------------------------EE----QE----------
----------SSIRNSGGGGDHHDGGHK-----------SKHQQSHHH--ASSS------
-----------------------------------------------------HHQQQQQ
QHH----SQQQQQQQLGQDRHHVHHHDLLQAAASAN---YAADISKMAA----------K
S----------------------------------------------LT-----------
------------------------------------------------------------
------------------------------------------------------------
------------------------------------------------------------
-------------------------------------------------------
>lcl|Query_10163
------------------------------------------------------------
------------------------------------------------------------
---MNG---SLY-----DDSP---VVG--SAADQHRRS----AIAS--------------
------AAQQQQQQQQQQQQQQQQQQ-QQQQASASVGPASSTNGNVRGEQDDPN-PNH--
----QLSPSAG----------------GGSS----------------SGGSS--------
------------------------------------------------------------
------------------------------------------------------------
--------GP---L--------------HIPAK------RLAVGQT---------AAGPG
A---S--S----------------YPGHHTHHHVTHSHHDPN--SGG-----------GS
GGGGG----GGGGINGDSSGTSSLLRA-QPWPYSV-------GD--VQGHSAGSF--DPQ
SYS-P-SSLVRDGMA------------------AAAAAAYYG-------A-----DRAKA
ALSFWPSDYGKYGAAA--AAAAAGQ--GPSAGLPTSAE-AAAA---NAQFN---AQ----
------------------------------------------------------------
-------------------------------A-AW-C------------GYAGY------
-------GGRVPEPHGH-PGLGPTPGQPGMGVPVSVAGYLAAEAHEARRGAMDAAAAAAC
GFTHDSY-AGLRGYGPGPDGMPP-SVYGPGSLGP--------------------------
-------------------------------NPLEW------------------------
---------------------TGQVTVRKKRKPYSKFQTLELEKEFLFNAYVSKQKRWEL
ARNLNLTERQVKIWFQNRRMKNKKN------------SQ---------------------
---------------------------------RQQAGGNSS------------------
------------------------------------------------------------
------------------------------------------------------------
------------------------------------------------------------
------------------------------------------------------------
------------------------------------------------------------
------------------------------------------------------------
------------NNSGGGNANANANA-H-HNSSHHHHHHHHGPPDG--------------
---HHHHHAGPIGPVVHNGVHNICSAK---------------------------------
------------------------------------------------------------
------------------------------------------------------------
------------------------------------------------------------
------------------------------------------------------------
------------------------------------------------------------
-------------------------------------------------------
>lcl|Query_10164
------------------------------------------------------------
------------------------------------------------------------
------------------------------------------------------------
------------------------------------------------------------
---------MN----------------S--------------------------------
DVLYG-------------MCNGEVHNFSPQSFNNDFSS----------------------
--------QVYY-PTVS-NSEEN--QYSNG------------------------------
---------------------NQYMHPNHLQNL------THRN-------------ETRS
I---T-LT----------------AGHDP-----------AAD-STT-----------SY
-------TYSPTAGSNFSNSYHNGENI------------------METYNEENLHNNNVN
SISYP-------------Y--------------SES-------------------QTLHV
-----LTSCNSNYSSE--HIPSNAP--MHIVPQITNGSQTTEN------AHSAAPT----
------------------------------------------------------------
-------------------------------Y-KW-M------------QVKRS------
-------AGKP---------------------------------------------GKTG
DCSF------------TGN-----------------------------------------
---------NN-------------------------------------------------
----------------------------AGRTNFTTKQLTELEKEFHFNKYLTRARRIEI
ATALQLNETQVKIWFQNRRMKQKKR------------LK---------------------
---------------------------------D--GH----------------------
------------------------------------------------------------
------------------------------------------------------------
------------------------------------------------------------
------------------------------------------------------------
------------------------------------------------------------
------------------------------------------------------------
------------------------------------------------------------
------------------------------------------------------------
-----------------MA-LSTQDLNSQNS-----------------------------
------------------------------------------------------------
------------------------------------------------------------
------------------------------------------------------------
------------------------------------------------------------
-------------------------------------------------------
>lcl|Query_10165
------------------------------------------------------------
------------------------------------------------------------
------------------------------------------------------------
------------------------------------------------------------
------------------------------------------------------------
------------------------------------------------------------
------------------------------------------------------------
------------------------------------------------------------
------------------------------------------------------------
------------------------------------------------------------
------------------------------------------------------------
------------------------------MES---DHESGFINSHPSIAEFMTSI----
PHINETFHT---SSITSPG--------M---PPT-FCQQLNSSNQLPTV---A-------
-----------AASQ-RKHSNVPSVKL--PEY-PW-MREKK----------TVR------
-------KPQQDTT----------------------------------------------
------------------------------------------------------------
--------TENSGT---------------------------------P------------
---------------------------RRLRTAYTNTQLLELEKEFHFNKYLCRPRRIEI
AASLDLTERQVKVWFQNRRMKHKRQ-NLGKG---AEDSNCNSISSSDEPSNSTTLSNGAG
SPKLL-------TSHNIGQELNQNSQQCNGSS--------PHV--PSQLCSDDENSQNSD
SVDLNMTVNAANFN----G------SYNEADRDFT----------NLQTLNTKSFSVTSD
NIE------------KL--R-----------PQNNRNSHSQ--------------NYNGH
TNSFSPLSPVDGSRQNSCNNQSGYLNDSDYARYPNLTSPS----VPSPA-S---PNIQTL
NSSNQIQNLQQNFNCL-----SDFA--TAPKQDYPNISLLTNQVQSPAVGSPNIPDFIPS
----SNQLVPTSFD---HL---------------------SY---SY-----NLGVHNGQ
STNCTP----VDFIFNDVNNGEFS------AEYYNLD-----------------------
------------------------------------------------------------
------------------------------------------------------------
------------------------------------------------------------
------------------------------------------------------------
------------------------------------------------------------
------------------------------------------------------------
------------------------------------------------------------
-------------------------------------------------------
>lcl|Query_10166
------------------------------------------------------------
------------------------------------------------------------
------------------------------------------------------------
------------------------------------------------------------
------------------------------------------------------------
------------------------------------------------------------
------------------------------------------------------------
------------------------------------------------------------
------------------------------------------------------------
------------------------------------------------------------
------------------------------------------M---S-----DHCQNEIN
FSNT-GMQK--------------TF--YDNSQPYT--G------YFN-----SNGY----
------------------------------------------------------------
-------------------------------N-NY---DHLQQ---PQQYYNNRPEDN--
--YRPACF-------------LQEQAVLPLSP---NSP-------DYSQACMQTSNSQCE
LPEPVPNSN------PQ-----C-------------------MSKQIYPWMKE-SRQNSK
QR----------QL-----------------SHLPE------------------------
---------------------FD-QPAKRARTAYTSAQLVELEKEFHFNRYLCRPRRIEM
AALLNLSERQIKIWFQNRRMKYKKD------------QKS--------------------
-----------------------------------KGL--SGK------SDSPASPNTM-
------------------------------------------------------------
------------------------------------------------------------
------------------------------------------------------------
--------------------LSAGP-----------------------------------
------------------------------------------------------------
---TI-----------------------------------LETL----ECNP-------V
TLAQTNHH----PIVRT--------------------------------------LSIRD
-----------TDSPSVL----CSNSSPILMHPSNIHPDDIHQQLYN-------------
----MQESLQTQGNYSIPPKLTHL------------------------------------
------------------------------------------------------------
------------------------------------------------------------
------------------------------------------------------------
------------------------------------------------------------
-------------------------------------------------------
>lcl|Query_10167
------------------------------------------------------------
------------------------------------------------------------
------------------------------------------------------------
------------------------------------------------------------
------------------------------------------------------------
------------------------------------------------------------
------------MIMSSFLMNSGSY---------------VDPKFPPNEEYSQNSYIPSQ
V-Q--DYYGA-------------------------------SVQN-------Y---GYPS
S---Q-----AAVSYGQDSYTNPGAG----YMQQHYAS--AA-------------PRLSQ
NLE---TSQSPTRVQPS------------SSPQS-----------PPSSMTTI-------
-----------PT----------------EP----------------------------Q
N---VPTSQP-----------------TSQTNNNQ-------------------------
------------------------------------------------------------
----------------------------PVIY-PW-MK----------------------
-------KVHVNTVA---------------------------------------------
------------------------------------------------------------
-----------NGS-YGS--------------------------GVEP------------
---------------------------KRQRTAYTRHQILELEKEFHFNRYLTRRRRIEI
AHALCLTERQIKIWFQNRRMKWKKD-HKLPNT-KPASS---S------------------
---------------------------------SQP-DLSTQA-R---------IDPS--
------------------------------------------------------------
------------------------------------------------------------
------------------------------------------------------------
-----------------------QR----------------------DPDLNGLP-----
------------------------------------------------------------
------------------------------------------------------------
------------------------------------------------------------
------------------------------------------------------------
------------------------------------------------------------
------------------------------------------------------------
------------------------------------------------------------
------------------------------------------------------------
------------------------------------------------------------
-------------------------------------------------------
>lcl|Query_10168
------------------------------------------------------------
------------------------------------------------------------
------------------------------------------------------------
------------------------------------------------------------
------------------------------------------------------------
--------------------------------------------------MSSYFVNSLT
CYNQRGQDSTGQG----YYS-Q-----------------TAPA-----Y-SNCYT-----
-------------------------------------------------------PGSAS
----QYPYSHP----------SAP----NNQNGDHYQPQRLSH-----------------
-PDT-QHS-----------------PT-IASS----------------------------
-TAV--------------------------------------S-SCKFTDSSNSTTSSVS
V---------------------------------------PGQPEQNSTTAQNVA-----
--------------QSPKQNFQSSPQ----------------------------------
------------------------------IY-PW-MR----------------------
-------RAHVGQSL---------------N-----------------------------
-------GM---------------------------------------------------
----------------------------------------------EA------------
---------------------------KRQRTSYTRYQTLELEKEFHFNRYLTRRRRIEI
AHALCLTERQIKIWFQNRRMKWKKE-HKMS------------------------------
-------------------------------------------------SSTPPQTQVGQ
LSPESKD-----------------------------------------------------
------------------------------------------------------------
------------------------------------------------------------
------------------------------------------------------------
------------------------------------------------------------
------------------------------------------------------------
------------------------------------------------------------
------------------------------------------------------------
------------------------------------------------------------
------------------------------------------------------------
------------------------------------------------------------
------------------------------------------------------------
------------------------------------------------------------
-------------------------------------------------------
>lcl|Query_10169
------------------------------------------------------------
---------------------------------------------MSSYF----------
------------------------------------------------------------
-----------------------------------------------------------S
NI----SPPNW----------------SNDG----------------PDHYYPQN---T-
KYSMN------------FR---ENYFSQ---TTGTFNL----------------------
--------------------------PTS------------------------------N
RID----IRS---I--G--------------TK------NVPYSET---------N----
S---S--V----------------SG---QTYYQSTAPQRV-------------------
--SQVE-NETYS-------------------------------S-CKLEEFP--------
------------------------------------------S---P-----NTNN----
--------N--------------DD--ATSGQNL--EQ---NT--STIQTKTP--L----
------------------------------------------------------------
-------------------------------Y-PW-M-----------RSYTD-------
------------------------------------------------------N-GFGP
------------------------------------------------------------
------------------------------------------------------------
---------------------------KRTRQTYTRYQTLELEKEFHFNRYLTRRRRIEI
AHALGLTERQIKIWFQNRRMKWKKE------------NK---------------------
----------------------------------STSLGDTP------------------
------------------------------------------------------------
------------------------------------------------------------
------------------------------------------------------------
------------------------------------------------------------
------------------------------------------------------------
------------------------------------------------------------
------------------------------------------------------------
----------------------------------------SPDQ----SETKPDLSQNSD
------------------------------------------------------------
------------------------------------------------------------
------------------------------------------------------------
------------------------------------------------------------
------------------------------------------------------------
-------------------------------------------------------
>lcl|Query_10170
------------------------------------------------------------
------------------------------------------------------------
------------------------------------------------------------
------------------------------------------------------------
------------------------------------------------------------
--------------------------------------------------MSSYFTNSYL
SDLRGSNTEHFGG----HLT-Q-----------QG----TTPCDPARQH-VGQYG-----
-------------------------------------------------------PTNAQ
G---TYPRFPPYDRLEIRPIANSQ----QQQNQFYNQSSTISG-----------------
-LQN-AESEDC-NSVHSTGQGQATQPP-AASSQ---------------------FNSCKL
QAST--------------------------------------T-SCLQTDVNNTNSSSSS
T---------------------------------------E---QTSSQFSQNTR-----
----------------PETAASLTSP----------------------------------
------------------------------LY-PW-MR----------------------
-------N-HFGTER---------------K-----------------------------
------------------------------------------------------------
----------------------------------------------RG------------
---------------------------RQTYTRYTRYQTLELEKEFHFNRYLTRRRRIEI
AHALCLTERQIKIWFQNRRMKWKKE-NKTK------------------------------
-------------------------------------------------LPGSDSNELSV
VVHETQT-----------------------------------------------------
------------------------------------------------------------
------------------------------------------------------------
------------------------------------------------------------
------------------------------------------------------------
------------------------------------------------------------
------------------------------------------------------------
------------------------------------------------------------
------------------------------------------------------------
------------------------------------------------------------
------------------------------------------------------------
------------------------------------------------------------
------------------------------------------------------------
-------------------------------------------------------
>lcl|Query_10171
------------------------------------------------------------
-------MSSFFEPANMSNTLERYQIGQGILSSAAFPQIRQSN---ENFYEN-SNTYK--
-LYATAPTP--GQAP-----YKACYYENEQNGYK--------PSWSPSPSCQSSASR---
--------------------------------------------PAPYSPPP----RNST
ST----TTNSW----------------TSC------------------------------
------------------------------------------------------------
------------------------------------------------------------
------------------------------------------------------------
------------------------------------------------------------
----------------TTSQ--VNPS----------------------S-----------
------------------------------------------------------------
------------------------------------------------ETTP---F----
------------------------------------------------------------
-------------------------------Y-PW-------------M-----------
----NVA----------------------------------------------GANGLQR
------------------------------------------------------------
------------------------------------------------------------
---------------------------KRGRQTYTRYQTLELEKEFHTNHYLTRRRRIEM
AHALCLTERQIKIWFQNRRMKLKKE------------MQ---------------------
---------------------------------TIKDLNEQEK--------KQRDTSLT-
------------------------------------------------------------
------------------------------------------------------------
------------------------------------------------------------
--------------------V---------------------------------------
------------------------------------------------------------
------------------------------------------------------------
------------------------------------------------------------
------------------------------------------------------------
------------------------------------------------------------
------------------------------------------------------------
------------------------------------------------------------
------------------------------------------------------------
------------------------------------------------------------
-------------------------------------------------------
>lcl|Query_10172
------------------------------------------------------------
------------------------------------------------------------
------------------------------------------------------------
------------------------------------------------------------
------------------------------------------------------------
------------------------------------------------------------
------------------------------------------------------------
------------------------------------------------------------
------------------------------------------------------------
---------------------------------------------MSSNFINSMI--SKY
TAESA-CYRSHDTRL------------------YPYAPQPGAH---S------AYMPFCT
ESDL-SKSC--------------RF--ANENSSQNPGN---CT--FSSQAGVSANG----
------------------------------------------------------------
-------------------------------V-TS-S-----------S-----------
----QLNQS----VASSVPNSFSSCSQGA-----LGTSSIITSVPYFPWMSVGGTNGCPR
------------------------------------------------------------
------------------------------------------------------------
---------------------------RRGRQTYTRYQTLELEKEFHFNHYLTRRRRIEI
AHVLCLTERQIKIWFQNRRMKLKKE------------LR---------------------
---------------------------------AVKEINEQAR--------LESATKC--
------------------------------------------------------------
------------------------------------------------------------
------------------------------------------------------------
------------------------------------------------------------
------------------------------------------------------------
-----------------------------------------------------N-----E
ASKSS-------------------------------------------------------
------------------------------------------------------------
------------------------------------------------------------
------------------------------------------------------------
------------------------------------------------------------
------------------------------------------------------------
------------------------------------------------------------
-------------------------------------------------------
>lcl|Query_10173
------------------------------------------------------------
------------------------------------------------------------
--------------------------------------------MTSMMN---GSFY-ED
NAC--KP----------------------------------NLDSVST--------PQCL
QN----GPLHI----------------PAKR----------------VATSL----AVS-
---FP------------RECMV--------------------------------------
--------DTNSVIR-GNQ-------PWP------------------------------G
YTT----SDN---A--SFD---------------------APYNP----------T-FC-
----R--E----------------GMNPNSYYYSD-----------P-----------RT
ERKPV---KFWQNS-HDLQS--GSTA------TSS-------EA-F-ST-FTAQT--WCN
Y-PCA--GRMG--HI------------------EG--HA--QH---I-----PSCLGADE
--RQRFSVD--------------G------YDC---GL---RS--FPTNAEA-TPT----
------------------------------------------------------------
-------------------------------A-TY-S-----------SADTL-------
------------------------------------------------SNSMEWTSNVTV
------------------------------------------------------------
------------------------------------------------------------
---------------------------RKKRKPYSKFQTLELEKEFLFNAYVSKQKRWEL
ARNLNLTERQVKIWFQNRRMKNKKN------------NQ---------------------
----------------------------------RNLENNK-------------------
------------------------------------------------------------
------------------------------------------------------------
------------------------------------------------------------
------------------------------------------------------------
------------------------------------------------------------
------------------------------------------------------------
------------------------------------------------------------
------------------------------------------------------------
------------------------------------------------------------
------------------------------------------------------------
------------------------------------------------------------
------------------------------------------------------------
------------------------------------------------------------
-------------------------------------------------------
>lcl|Query_10174
------------------------------------------------------------
------------------------------------------------------------
------------------------------------------------------------
------------------------------------------------------------
------------------------------------------------------------
------------------------------------------------------------
------------------------------------------------------------
------------------------------------------------------------
------------------------------------------------------------
------------------------------------------------------------
------MRVKHPLRMPTGHLDD--DDFVVVKTRSNSP------------EAGGGGFWLAA
--ASGAPHPAALPIE--------------------GCNETGFINSQPSMAEFMTAL----
PHLSGDMTH---GA-------------------------SISPQNTPPA----GYPMDV-
----------PHGMG------SPGVNV--PEY-PW-MKEKK----------TTR------
-------KSSQQ------------------------------------------------
------------------------------------------------------------
----------ENGL---------------------------------P------------
---------------------------RRLRTAYTNTQLLELEKEFHFNKYLCRPRRIEI
AASLDLTERQVKVWFQNRRMKHKRQ-TLGKQG-DDGDDK--------------DSITSDG
GKNGKLS-DKF-----------LDDE---MSKKSCQGCEMPSAGLCGSHDEIPDISS-TR
GNNNNTPSATNNNTNFNNN-----SNGAS-------------------------------
---------SVGSSSPFDKL------IEEDS----RSNEDT-----------SLHPSPRI
TKKANSVSVKVENRRNSPNSCEKKIGLSKI--SPKESQDA----ANVKLSP---KSASS-
------LPPGNNIHGM-A-----------PSVMYP-------------HLNRSSPTTATA
I----ASATVTIQNV--SN-------------TIPP----------F-ASRGSMHFPNQY
QMNQEY---RTDRKH---TQQHYQ----MNQNMYPGE--MYN---------PEHTTVNEA
QPY---------VRNTTVPTQGVARMSR-----GR------------------QYNYPNP
QQ-QYYYNKNHPNSENYI------NH--QNYVQG-YQGEH--------------PNY-NH
Y---GYHY----------------SGDG-----GEVAHL--PNTHMGH-E----------
-PGAA----YYQNE-----N---MLQ--KNA---EYS------------GKVG--YYENN
HYNGDPNYIS-PEVFPNTNNAIMTPPA----SVQT---------ESSDNYNSFHQFY---
-------SSESSQNQVAPTGENSNSSSDFNFLSNLANDYTP--EYYQI------------
------------------------------------------------------------
-------------------------------------------------------
>lcl|Query_10175
------------------------------------------------------------
------------------------------MM-MDVGMYGHHSQHGTYPS----DNYY--
-NYTSDIPN-------AQQMPPHYS--------NYHYE----DPYGYTGSEETPPSPQEV
YYHHQTIPQDNPIINTET-GLSYTNL-DYGN-----------------------------
------------------------------------------------------------
------------------------SNFP--------------------------------
--------PINHQNYNEPYQRTHENMLLRH------H-----------------------
-EE----VAD---G--HQH------------HF------LHENKY--------------Q
L---E-V------------------D-------------SGY------------------
-------HLGASSTPT-------NSCM-EY---------------------QHLH---RY
KEE--------------------------------ALQ----------------------
-----------------------GD--GRMRQHVMHNLSSVPQ---PQP---VLPT----
------------------------------------------------------------
-------------------------------Y-KW-M------------QVKRN------
-------VPKP-TVP---K--IPPAEF-------------------PTTSSS-------S
A---------------LESPN----P-ASRSSCLGSNTSSM-------------------
-----LSLNCL-------------------------------------------------
---------------------------NTGRTNFTNKQLTELEKEFHFNKYLTRARRIEI
ASALQLNETQVKIWFQNRRMKQKKR------------MK---------------------
---------------------------------E--GL-IPP------------------
------------------------------------------------------------
------------------------------------------------------------
------------------------------------------------------------
---------------------E--------------------------------------
------------------------------------------------------------
------------------------------------------------------------
---------------------------------------PISASL---------------
------------------------------------------------------------
--------------------STSNSNSPSSTNLIQ---------NEASN-----------
-----------------------------------------------ENSRESN------
------------------------------------------------------------
------------------------------------------------------------
------------------------------------------------------------
-------------------------------------------------------
>lcl|Query_10176
------------------------------------------------------------
------------------------------------------------------------
------------------------------------------------------------
------------------------------------------------------------
------------------------------------------------------------
------------------------------------------------------------
------------------------------------------------------------
------------------------------------------------------------
------------------------------------------------------------
------------------------------------------------------------
------------------------------------------------------------
-----------------------MS--YSQFENQAVLQ---SY--NFLQEKTTYEY----
------------------------------------------------------------
-------------------------------Y-EN-N-----------Q-----------
----ALPPITYPPSDWNCPQYNAPPYMSS-----VLQLPTVTEIQETQPQRTKPTAG---
------------------------------------------------------------
------------------------------------------------------------
---------------------------KRARTAYTSAQLVELEREFHHGKYLSRPRRIQI
AENLNLSERQIKIWFQNRRMKHKKE------------QM---------------------
---------------------------------NKVSTPRSSP--------AETASSLS-
------------------------------------------------------------
------------------------------------------------------------
------------------------------------------------------------
--------------------PQSVA-----------------------------------
------------------------------------------------------------
---ST-----------------------------------ASSA----DHQIVD-----R
LLSHAPIDSANQWYSQTIDNSYQFCDNLQYSFDNQCSGTIDWALPKQEDCFYQEGWNGQS
FDVSQPALTTL-------------------------------------------------
------------------------------------------------------------
------------------------------------------------------------
------------------------------------------------------------
------------------------------------------------------------
------------------------------------------------------------
-------------------------------------------------------
>lcl|Query_10177
------------------------------------------------------------
------------------------------------------------------------
------------------------------------------------------------
------------------------------------------------------------
------------------------------------------------------------
------------------------------------------------------------
------------------------------------------------------------
------------------------------------------------------------
------------------------------------------------------------
---------------------------------------------MSKDSLEIVK--N--
--EEF-DSDSKLPFS------------------GLFIENQAGN---A-----PVFNNYMD
ENQALGFKI--------------SD--NSGINSQMIDY---SR--PNWSYLRTPQF----
------------------------------------------------------------
-------------------------------E-PQ-Q-----------F-----------
----EVSLS-------------ENRSHEP-----E------------MERPKGASNG---
------------------------------------------------------------
------------------------------------------------------------
---------------------------KRARTAYTSSQLVELEREFHRSKYLCRPRRIQM
AQNLNLTERQIKIWFQNRRMKFKKE------------EK---------------------
---------------------------------NKVVTPKTSP--------NEASMSPQ-
------------------------------------------------------------
------------------------------------------------------------
------------------------------------------------------------
--------------------STSSN-----------------------------------
------------------------------------------------------------
---NS-----------------------------------ASPK----ACQFLY-----N
QFPGSSQVVVKDETCQYDTESSYQFNDPQFNFNYQYNQAYSNYNNYQEGFSCQYYQGKNC
VGGKVDETAGVYSGWEGQVLENMPQPNLTSL-----------------------------
------------------------------------------------------------
------------------------------------------------------------
------------------------------------------------------------
------------------------------------------------------------
------------------------------------------------------------
-------------------------------------------------------
>lcl|Query_10178
------------------------------------------------------------
------------------------------------------------------------
------------------------------------------------------------
------------------------------------------------------------
------------------------------------------------------------
------------------------------------------------------------
-------------MMSSFLMNPGTALPTYQ-QPQHISGVVVDPKFPPSEEYNQNSYIPPG
GDFFGNHHIQ---QQ------------------------QLQY-------------GYHN
H---QNY--------------NSNVL-SNGYGY-----------------GNYYH-----
----------------PQLHSHHGPPI---HHQIR-------PPILHDTQPMC-------
-------ESLNTQ----------------PPVTSSSNIL---------------------
------QNLADITPNV----TPNCD--VKSSVCSPGSGHQDSRTSPSGQHLQ-ELGLRLE
-----------DA--------------------NSDEQDD--GDDGQGSSTNN----DE-
--------DDDDE----ETGDR-------QIY-PW-MR----------------------
-------KVHVAGA----------------------------------------------
------------------------------------------------------------
----------SNGT-FAP--------------------------GMEP------------
---------------------------KRQRTAYTRHQILELEKEFHYNRYLTRRRRIEI
AHTLVLSERQIKIWFQNRRMKWKKD-NKLPNT-KNVRRKTNP------------------
---------------------------------AGVTTTTKGK-VRAKTQNATPANNNDK
RKSRGE------------------------------------------------------
------------------------------------------------------------
----------------------------------------------VDGLGENMM-DMSL
T------------RHQISSMGHSHA----------------------HPMHHD-------
MLPETMHM--------------------------------------------------GM
GPSL-----------------------------------T--------PLASPG--C---
---------GPGQGGLQPTIKSDYGLTAL-------------------------------
------------------------------------------------------------
------------------------------------------------------------
------------------------------------------------------------
------------------------------------------------------------
------------------------------------------------------------
------------------------------------------------------------
-------------------------------------------------------
>lcl|Query_10179
------------------------------------------------------------
------------------------------------------------------------
------------------------------------------------------------
----------------------------------------------------MS-----S
YQFVNSLA-Q-------------------CY----------GQQARDQQSSP--------
----------------GTDYYNPNAN-ST------YPP-------------ACYSPPQVA
PQYPQHPYAAPAPG---HGL--------------Q---------P-TMGDYTQLQ-----
-------------------------------------------------------PQRLA
P---T--HLQ----------S--------------PNTQTHP-----------SASCKY-
----------ADSTSSTG--------------------------------VAS-------
-----------PQ----DL-STNGAPPR-STPPLSTPS--NSN-ATKSSGLTSPLSVSTS
PPGKPATSTASQ--------------NLSSPASSTSSTSSTEKAGTNNNNSKSGQ-----
--------------SS------NPPQ----------------------------------
------------------------------IY-PW-MK----------------------
-------RVHLGQST---------------------------------------------
------------------------------------------------------------
----------VNAN-------------------------------GET------------
---------------------------KRQRTSYTRYQTLELEKEFHFNRYLTRRRRIEI
AHALCLTERQIKIWFQNRRMKWKKE-----------------------------------
------------------------------------------H----------KMASMNI
VPYHMSPYGHP-------------------------------------------------
------------------------------------------------------------
------------------------------------------Y-QFDLHPSQFAHLAT--
------------------------------------------------------------
------------------------------------------------------------
------------------------------------------------------------
------------------------------------------------------------
------------------------------------------------------------
------------------------------------------------------------
------------------------------------------------------------
------------------------------------------------------------
------------------------------------------------------------
------------------------------------------------------------
-------------------------------------------------------
>lcl|Query_10180
------------------------------------------------------------
----------------------------------MN---------LSAQF----------
------------------------------------------------------------
-----------------------------------------------------------S
DY--------W----------------TNSF----------------YQNYKTNPFLAS-
DCDKN------------QN--TEHNYTH----NNEMYH----------------------
--------SVKEEPIY-ESCRFSINQPYL------------------------------N
HFD----NSV---T--PMVN----------------------HDFT---------QHL--
S---Q--Y----------------DT-CQQGIYPENKTLIN------------------E
TSLQLD-ENKLDK---------------------------------KDDDSPALR--ALL
T-----------------------------------RPQAKKT---P-----PNQY----
-------EN--------------FQ--QYDNNNF--SA---EE--NSVSEPPA-NF----
------------------------------------------------------------
-------------------------------Y-PW-M-----------KAHGD-------
------------------------------------------------------SSATGN
------------------------------------------------------------
------------------------------------------------------------
---------------------------KRTRQTYTRYQTLELEKEFHFNKYLTRRRRIEI
AESLRLTERQIKIWFQNRRMKAKKD------------TK---------------------
----------------------------------FTEQSVTS------------------
------------------------------------------------------------
------------------------------------------------------------
------------------------------------------------------------
------------------------------------------------------------
------------------------------------------------------------
------------------------------------------------------------
------------------------------------------------------------
----------------------------------------TFDFLSLHPAETSMNDVNRN
------------------------DCAKPLTQIRNIPGPPETP-----------------
------------------------------------------------------------
------------------------------------------------------------
------------------------------------------------------------
------------------------------------------------------------
-------------------------------------------------------
>lcl|Query_10181
------------------------------------------------------------
------------------------------------------------------------
------------------------------------------------------------
------------------------------------------------------------
------------------------------------------------------------
------------------------------------------------------------
--------------------------MS---S-------YFA--NSYMPDMRNGGVVSAE
HPHQHQHYGAAVQVPQGGRRR-AARPGVVTTPRWGCARASSATT-MGGPRYG-R-AAAQG
M-PYPRFPPYDRMDIRDRRS---------------------------L--------HGPQ
Q-QMDG---------------QEYRPD---SP----SSM-HMANT--A---APNGHQ--T
QVVYD-SCKLQAAAVTQNG-----------------VLGPTGS-PPLTTQSMNNHHMGHH
MQ----------EQHPQ--HHQPH--HQQQHMMYGGQQ--GANMHQQGPPHQQPPIQQQP
NQGQQPPGNTAAALPSP------------LY-----------------------------
---------------------------------PW-MRSQ--------------------
------------------------------------------------------------
------------------------------------------------------------
---------------------------------------------FER------------
---------------------------KRGRQTYTRYQTLELEKEFHFNRYLTRRRRIEI
AHALCLTERQIKIWFQNRRMKWKKE-NKTKGE-GGSEGGGDDI------SPQGSPQ----
------------------------------------------------------------
------------------------------------------------------------
------------------------------------------------------------
------------------------------------------------------------
------------------------------------------------------------
------------------------------------------------------------
------------------------------------------------------------
------------------------------------------------------------
------------------------------------------------------------
------------------------------------------------------------
------------------------------------------------------------
------------------------------------------------------------
------------------------------------------------------------
------------------------------------------------------------
-------------------------------------------------------
>lcl|Query_10182
------------------------------------------------------------
---------------------------------------------MNSYFEQ-SGFYG--
-SHHHQSG---SVAG-----HHHEQSAAAAAAYRSFPLSLGMSPYA-SSQHHHHHLQ---
-------------------------------------------ARPPQDSPYD-------
------A-SVA----------------AACK----------------LYSSEGQQNSNY-
SSNSK------------PDCSK-GNADQN-GYASVV------------------------
------------------------------------------------------------
--------------------------------------------------------AAAA
V---K--D----------------VWQSATSGGGANLTNSLTG-----------------
-----------------PVR--PAACT------PD-------SR-VGYGSVGLVG--GDP
ASSPG-AAAGRT----------------------------------------------GN
SLSWNNPCS--------------IN--STSSQPVGT------Q--IHQQ-TN-HTF----
------------------------------------------------------------
-------------------------------Y-PW-------------M-----------
----AIADS-MT-------------------------------F---------GANGL-R
------------------------------------------------------------
------------------------------------------------------------
---------------------------RRGRQTYTRYQTLELEKEFHTNHYLTRRRRIEM
AHALCLTERQIKIWFQNRRMKLKKE------------IQ---------------------
---------------------------------AIKELNEQEK--------QAQAQKAA-
------------------------------------------------------------
------------------------------------------------------------
------------------------------------------------------------
--------------------A---------------------------------------
------------------------------------------------------------
------------------------------------------AA----AAVA-A-----Q
VDPN--------------------------------------------------------
------------------------------------------------------------
------------------------------------------------------------
------------------------------------------------------------
------------------------------------------------------------
------------------------------------------------------------
------------------------------------------------------------
-------------------------------------------------------
>lcl|Query_10183
------------------------------------------------------------
------------------------------------------------------------
------------------------------------------------------------
--------MSSKFIIDSML-PKYHQQFHHQQLFQSATTE---------------------
------APAAY----------------SSSS----------------PSGSS--PQHSSS
SASTS------------PAA--RMYPYVSAAHHHHQAA----------------------
--------AAAFGAAAS-------------------------------------------
G-S----MVP---SFSSTASSALAAAVDAATDK------SCRYTAG---------LAANV
T---P-AD----------------SMV--NYTLGQHHHNGAA--V---------------
--SAA--------SSVSAASASMAVAA-QFYHQAA-------SA--VVDPLNS-------
----------------------------------------CSQ---P-------------
-----------------------AA---PGGQPI----------------P-DIPR----
------------------------------------------------------------
-------------------------------Y-PW-M------------SITD-------
-----------WMSP------FDRVVCG----------------------PN--------
-----------------GCPRRR-------------------------------------
------------------------------------------------------------
-----------------------------GRQTYTRFQTLELEKEFHFNHYLTRRRRIEI
AHALCLTERQIKIWFQNRRMKLKKE------------LR---------------------
---------------------------------AVKEINEQA------------------
------------------------------------------------------------
------------------------------------------------------------
------------------------------------------------------------
---------------------RRER-----------------------------------
------------------------------------------------------------
------------------------------------------EE----QE----------
----------RHKQQQQEKQQKIEQQTH-----------SSIHQHHH-------------
-----------------------------------------------------DPMKMS-
---------------------LDKSGGS--------------------------------
-----------------------------------------------DLLKAVSKV----
----------------PT------------------------------------------
------------------------------------------------------------
------------------------------------------------------------
-------------------------------------------------------
>lcl|Query_10184
------------------------------------------------------------
------------------------------------------------------------
--MMNG---GIY-----EESP---PPAPQSAATPISSS----GMTS--------------
------PA-------------------------AAPPPATTSSG----------------
------SPASV----------------A-------------------SNA-S--------
------------------------------------------------------------
------------------------------------------------------------
--------AP---L--------------HIPAK------RAAY-----------------
----D--C----------------E-GVIRHH----------------------------
--------------------------G-Q-WNYSP-------D---------NHF--E-Q
YPN-P-T--------------------------------YYN-------LADPARDSRKG
L--FWSP-----AATA--AATATEY--KYSAAAPGPSDPSVSS---CHQGF---SS----
------------------------------------------------------------
-------------------------------S-TW-C------------NYSAY------
-------SSASRHHVDH-Q---PVP-------------YLTPADDRGRVAAAAAMVAETA
SFHHDAAGYGLRNYGPEPVPSTP-YP-PPGSLG-----SMG-------------------
-----VSVPCGTSG-----------------NPLEW------------------------
---------------------TGQVTVRKKRKPYSKFQTLELEKEFLFNAYVSKQKRWEL
ARNLNLTERQVKIWFQNRRMKNKKN------------SQ---------------------
---------------------------------RQAAQQQNN------------------
------------------------------------------------------------
------------------------------------------------------------
------------------------------------------------------------
------------------------------------------------------------
------------------------------------------------------------
------------------------------------------------------------
------------NNAATNNQNHHHHAGH-HIHAQHHVVNHHVAANG--------------
---SLKHHQ---------------------------------------------------
------------------------------------------------------------
------------------------------------------------------------
------------------------------------------------------------
------------------------------------------------------------
------------------------------------------------------------
-------------------------------------------------------
>lcl|Query_10185
------------------------------------------------------------
------------------------------------------------------------
------------------------------------------------------------
------------------------------------------------------------
------------------------------------------------------------
------------------------------------------------------------
------------------------------------------------------------
------------------------------------------------------------
------------------------------------------------------------
------------------------------MAQPP-------PD-------QNFY--HHP
LPHTH-THPHP-----------------------------HSH---PHPHSHPHPHHQHP
QLQLPPQ-----------------F--RNPFDLLFDER---TG---AINYN---YI----
------------------------------------------------------------
-------------------------------R-PY-------------------------
--------------LPN-QM--PKPEEL--------------------------------
----------------------------PDSLVMR-------------------------
------------------------------------------------------------
-------------------------RPRRTRTTFTSSQIAELEQHFLQGRYLTAPRLADL
SAKLALGTAQVKIWFKNRRRRHKIQ------------SD---------------------
---------------------------------QHKDQSYEGM------PLSPGMKQSD-
------------------------------------------------------------
------------------------------------------------------------
------------------------------------------------------------
--------------------GDPPS-----------------------------------
------------------------------------------------------------
---LQ-----------------------------------TLSL----GGGATPNALTPS
PTPSTPTAHMTEHYSESFNAYYNYNGGHNHAQANRHMHMQYPSGGGPGPGSTNVNGGQFF
QQQQVHNHQQQLHHQGNHVPHQMQQQQQQAQQQQYHHFDFQQKQASACRVLVKDEPEADY
NFN----SSYYMRSGMSGATASASAVARGAASPGSEVYEPLTPKNDESP----------S
LCGIGIGGPCAIAVGETEAADDMDDGTSKKTTLQILEPLKGLDKSCDDGSSDDMSTGIRA
LAGTGNRGAAFAKFGKPSPPQGPQPPLGMGG-----------VAMGESNQYQCTMDTIMQ
AYNPHRNAAGNSQFAYCFN-----------------------------------------
------------------------------------------------------------
-------------------------------------------------------
>lcl|Query_10186
------------------------------------------------------------
------M----------SSV---------------------------MHY----------
------------------------------------------------------------
------------------------------------------------------------
-------------------------------------------------------YPV--
-----------------HQAKVGSY-----------------------------------
------------------------------------------------------------
---------------------------------------------S---------ADP--
S---E--V----------------KY--SDLIYGHHHDVNP-------------------
IGLPPN-YNQMNSNP----------------TTLN-------DH-CS-------------
PQHVH-Q-----Q----------------------------------------HVS---S
DENL---PS----------------------QPNH----------------DS-------
------------------------------------------------------------
---------------------------------QR-V-----------K-----------
-----------------------------------------------------------L
------------------------------------------------------------
------------------------------------------------------------
---------------------------KRSRTAFTSVQLVELENEFKSNMYLYRTRRIEI
AQRLSLCERQVKIWFQNRRMKFKKD------------IQ---------------------
----------------------------------GHREPKSNA------KLAQPQAEQS-
------------------------------------------------------------
------------------------------------------------------------
------------------------------------------------------------
--------------------AHRGI-----------------------------------
------------------------------------------------------------
---VK-----------------------------------RLMS----YSQDPR-----E
GTAAAEKRPMMAVAPVNPKPDYQASQKMKTEASTNNGMCSSADLSEILEHLAQ-TTAAPQ
VSTATSSTGTSTNSASSSSSGHYSYNVDLVLQSIKQDLEAAAQAWSK-SKSAPILATQS-
-WHPSSQSQVPTSVHAAPSMNLSWGEPAAKSRKLSVNHMNPCVTSYNYPN----------
------------------------------------------------------------
------------------------------------------------------------
------------------------------------------------------------
------------------------------------------------------------
-------------------------------------------------------
>lcl|Query_10187
------------------------------------------------------------
------------------------------------------------------------
------------------------------------------------------------
------------------------------------------------------------
------------------------------------------------------------
------------------------------------------------------------
------------------------------------------------------------
------------------------------------------------------------
------------------------------------------------------------
------------------------------------------------------------
------------------------------------------------------------
------------------------------------------------------------
------------------------------------------------------------
------------------------------------M-----------F-----------
----AIQSE-NYFVDNYSVSDLMMYPCVE-----LNVEAAPTAT---------TRSSEKS
------------------------------------------------------------
------------------------------------------------------------
---------------------------KRSRTAFSSLQLIELEREFHLNKYLARTRRIEI
SQRLALTERQVKIWFQNRRMKLKKS------------TNRKG------------------
---------------------------------AIGALTTSIP--------LSSQSSED-
------------------------------------------------------------
------------------------------------------------------------
------------------------------------------------------------
--------------------LQKD------------------------------------
------------------------------------------------------------
---DQ-----------------------------------IVER----LLRY-A-----N
TNVETAPLRQVDHGVLEEG-QITP--PYQSYDYLHEFSPEPMALPQLPFNEFDANWASSW
LGLEPTIPIAENVIEHNTQDQPMIQNFCWDSNSSSAS-----------------------
-SSDILDVDYDFIQNLLNF-----------------------------------------
------------------------------------------------------------
------------------------------------------------------------
------------------------------------------------------------
------------------------------------------------------------
-------------------------------------------------------
>lcl|Query_10188
------------------------------------------------------------
MMDVSSMYGNHPHHHHPHANAYDGYSTTTAS-AANASSYFAPQQHQPHLQLQQQQQHQ--
-HLQQPQQHLTYNGYESSSPGNYYPQQQAQLTPPPTSSHQVVQQHQQQQQAQQQQLYPHS
HLFSPSAAEYG-ITTSTTTGNPGTPLHPSSHSPADSYYESDSVH-----SYYAT-AAVAT
VAPPSNSSPIT----------------AANA----------------SATSNTQQQQQQA
AIISS------------E--NGMMYTNLDCMYPTAQAQ----------------------
--------APVHGYAGQIEEKYAAVLHASY------A----------------------P
GMV----LED---Q--DPMMQQATQSQMWHHQQ------HLAGSY-----------ALDA
M---DSLG----------------MHAHMHHGLPHGHLGNLAN-NPH-----------QQ
QPQVQ----QQQQQPHQQPQHPQNQSP-AAHQQHH-------QN---SVSPNGGM-----
--NRQ-QRG---------G--------------VISPGSSTSS-----------------
---------------------STSA--SNGAHPASTQS--KSP---NHSSS--IPT----
------------------------------------------------------------
-------------------------------Y-KW-M------------QLKRN------
-------VPKPQAPKLPASGIASMHDYQMNGQLDMCR--GGGGGGSGVGNGP-VGVGGNG
SPGIGGVLSVQNSLIMANSAAAA-GS-AHPNGMGVGLGSGS-------------------
-----GLSSCSLS-----------------------------------------------
-----------------------SNTNNSGRTNFTNKQLTELEKEFHFNRYLTRARRIEI
ANTLQLNETQVKIWFQNRRMKQKKR------------VK---------------------
---------------------------------E--GL-IPA------------------
------------------------------------------------------------
------------------------------------------------------------
------------------------------------------------------------
---------------------DILT-----------------------------------
------------------------------------------------------------
------------------------------------------QH----ST----------
---------------------------S-----------VISEKPPQQ------------
------------------------------------------------------------
-------------QQPQPPELQLKSQGSDLGGNELA---TGAPSTPTTA----------M
T----------------------------------------------LTAPTSKQS----
------------------------------------------------------------
------------------------------------------------------------
------------------------------------------------------------
-------------------------------------------------------
>lcl|Query_10189
------------------------------------------------------------
-MSKFVFDSMLPKYPQFQPFISSHHLTTTPPNSSSAAVAAALAAAAASASASVSASSS--
-SNNNSSNTIAGSNT---------SNTNNSSSSPSSSSNNNSNLNLSGGSLSPSHLSQHL
GQSPHSPVSSSSPFQQHHPQVQQQHLNHQQQQHLHHQQQQHHHQYSSLSAALQL-QQQQH
HISK-LAAAAV----------------ASHG----------------HAH-----QQLLL
TP---------------PSAGNSQAGDSSCSPSPSASG----------------------
--------SSSLHRSLNDNSPGSASASASA------S----------------------A
ASS----VAA---A-AAAAAAAASSSFAIPTSK------MYPYVSN---------HPSSH
G---G-LS----------------GMA-G--FTGLEDKSCSR--Y-T-----------DT
VMNSY--------QSMSVPASASAQFA-QFYQHAT-------AAASAVSAASAGA-----
---IG-VDSLGN--A-------------------------CTQ---P-------------
-----------------------AS---GVMPGAGGAGG--------AGIA-DLPR----
------------------------------------------------------------
-------------------------------Y-PW-M------------TLTDW------
-------MGSPFERVV----------CGD------------------FNGPN--------
-----------------GCPRRR-------------------------------------
------------------------------------------------------------
-----------------------------GRQTYTRFQTLELEKEFHFNHYLTRRRRIEI
AHALCLTERQIKIWFQNRRMKLKKE------------LR---------------------
---------------------------------AVKEINEQA------------------
------------------------------------------------------------
------------------------------------------------------------
------------------------------------------------------------
---------------------RRDR-----------------------------------
------------------------------------------------------------
------------------------------------------EE----QEKMKAQETMKS
AQQNKQVQQQQQQQQQQQQQQQQQHQQQ-----------QQQPQDHHSIIAHNP------
-----------------------------------------------------GHLHHSV
VGQ----NDLKLGLGMGVGVGVGGIGPGIGGGLGGN---LGMMSALDKS----------N
H----------------------------------------------DLLKAVSKV----
----------------NS------------------------------------------
------------------------------------------------------------
------------------------------------------------------------
-------------------------------------------------------
>lcl|Query_10190
------------------------------------------------------------
------------------------------------------------------------
------------------------------------------------------------
------------------------------------------------------------
------------------------------------------------------------
------------------------------------------------------------
------------------------------------------------------------
------------------------------------------------------------
------------------------------------------------------------
-------------------------------------MQEVCSS----LDTTSMGTQIKS
ES------PLNPLQVQTGQTSLP-----VGGCGGAGVVGGVGGVG---VSVGQPGIGQQG
V----PPVPSVLMVNK--MTPNCDK-RSADTAYWMTASEGGFINSQPSMAEFLNHLSPES
PKIGTPVGS---GAIGGVGVN---------------VNVNVGVGVGYPV----GVVPQT-
----------PDGMD------S----V--PEY-PW-MKEKK----------TSR------
-------KSSNNNNQG--------------------------------------------
--------------------DNS-------------------------------------
--I-------KNGL---------------------------------P------------
---------------------------RRLRTAYTNTQLLELEKEFHFNKYLCRPRRIEI
AASLDLTERQVKVWFQNRRMKHKRQ-TLSKT--DDEDNK--------------DSLKGDD
DQSDSNS----------------------NSKKSCQGCELPS-------DDIPDSTSNSR
GHNNNTPSATNNNPSAGNL-----TPNSSLETGISSN---------------LMGSTTVS
ASNVISADSSVASSVSLDED------IEESSPIKVKKKDDG-----------QVIKKEAV
STSSKASPFGYENSTPSLVSFRRDSDASAV--GNAPTSKA----VGKKRFQ---SAANA-
------IATPTPLSDS-NSGNGSGGG--PAGGYFP---G---------YYPSPKQQQQVQ
Q----QQLHPQQQQL--PQ-------------QQPQDYYGKYDIEFA-ASPHHNPHNKQQ
ALHGEYLSPKPSSANFHQNSQQQQ----QNDHFYY----NYNDT----NGTPYLNHQQQH
HHH---------AQHHQQQQHHQNHVADFEGPVNG------------------PSNFNNG
AY---YDNMSFQQQAQAH------QH--QTVVFQQQQPHQ--------------PAAINH
Q---HMHH----------------LGNG-----ETYSAL--GLQMENC-EGYN--NFGAA
GTGGG----YYEAG-----Q---QPP--IPA-----T------------HGHG--HHPHH
VQV-PAQAHA-P-IHAHHNSAAIPGGV----GVGPPPSHIHG-FAINGGPAVQGQAFGN-
-------NGSTAAGTAAISGLENSNSSDFNFLSNLANDFAP--EYYQLS-----------
------------------------------------------------------------
-------------------------------------------------------
>lcl|Query_10191
------------------------------------------------------------
------------------------------------------------------------
------------------------------------------------------------
------------------------------------------------------------
----------------------------------M---SSFLMGYPHAPHHVQSPMSMGN
GL-DPKFPPLADDYHHYNGHYS--------------------------------------
------------MTASTGHMSGAVGGGAGV-GSVGGGG--AGGMTGHPHSMHPADMVSDY
MAH--HHNPH---SH------------------------SHSHTH-----------SLPH
H---HSNS---AISGHHQA--SAGGY-S--SNYANATPPSHPH---S--HPHAHPHQSLG
YYVHHAPEFISAGAVHSDPTNGYGP-A-ANVPNTS-------NGGGGGGSGAV-------
-------LGGGAV----------------GGSANGYYGGYGGGYGTANGSVG---STHSQ
G-HSPHSQMMDLPLQC----SSTEP--PTNTALGLQELGLKLEKRIEEAVPA-GQQLQEL
G----MRLRCDDM--------------------GSENDDM--SEEDRLMLDRSPDELGSN
DNDDDLGDSDSDEDLMAETTDGER-----IIY-PW-MK----------------------
-------KIHVAGV----------------------------------------------
------------------------------------------------------------
----------ANGS-YQP--------------------------GMEP------------
---------------------------KRQRTAYTRHQILELEKEFHYNRYLTRRRRIEI
AHTLVLSERQIKIWFQNRRMKWKKD-NKLPNT-KNVRKKTVD------------------
---------------------------------ANGNPTPVAK-KPTKRAASKKQQQAQQ
QQQSQQQQ----------------------------------------------------
------------------------------------------------------------
-------------------------------------------TQQTPVMNECIRSDSLE
S------------IGDVSSSLGNPP----------------------YIPAAPETTSSYP
GSQQHLSN-----------------------------------------NNNNGSGNNNN
NNNNNNSNLNNNNNNNQ-------------------MGHTNLHG----HLQQQQ--S---
---------DL-MTNLQLHIKQDYDLTAL-------------------------------
------------------------------------------------------------
------------------------------------------------------------
------------------------------------------------------------
------------------------------------------------------------
------------------------------------------------------------
------------------------------------------------------------
-------------------------------------------------------
>lcl|Query_10192
------------------------------------------------------------
------------------------------------------------------------
------------------------------------------------------------
-----M---------------------------------------DPDCFA-MS-----S
YQFVNSLA-S-------------------CY----------PQQMNPQQNHPGAGNSSAG
GSGGGAGGSGGVVPSGGTNGGQGSAGAATPGANDYFPA-------------AAAYTPNLY
PNTPQAHYANQAAY---GGQ--------------G---------NPDMVDYTQLQ-----
-------------------------------------------------------PQRLL
L---QQQQQQQQQQHAHAAAAVAAQQQQQL--AQQQHPQQQQQ-----QQQ-ANISCKY-
----------ANDPVTPGGSGGGGVSG-SNNNNNS-----ANSNNNNSQSLAS-------
-----------PQ----DL-STRDISPK-LSPSSVVES--VAR-SLNKGVLGGSLAAAAA
AAGLNNNHSGSGV--------SGGPGNVNVPMHSPGGGDS-DSESDSGNEAGSSQ-----
--------------NSGNGK-KNPPQ----------------------------------
------------------------------IY-PW-MK----------------------
-------RVHLGTST---------------------------------------------
------------------------------------------------------------
----------VNAN-------------------------------GET------------
---------------------------KRQRTSYTRYQTLELEKEFHFNRYLTRRRRIEI
AHALCLTERQIKIWFQNRRMKWKKE-----------------------------------
------------------------------------------H----------KMASMNI
VPYHMGPYGHP-------------------------------------------------
------------------------------------------------------------
------------------------------------------YHQFDIHPSQFAHLSAXD
AWH---------FSGTGXRLNQLYQ----------------------EPYQTAAAASAAS
GYQSQDGG-----------------------------------------PIGGGSVGVGG
[truncated: 284,241 more chars]
